# Supplementary material
Source: Research Square preprint supplement (doi:10.21203/rs.3.rs-9501332/v1)
Supplement: Supplementary file 1 [file 58053b33256fb5a5aa95a95f.docx]

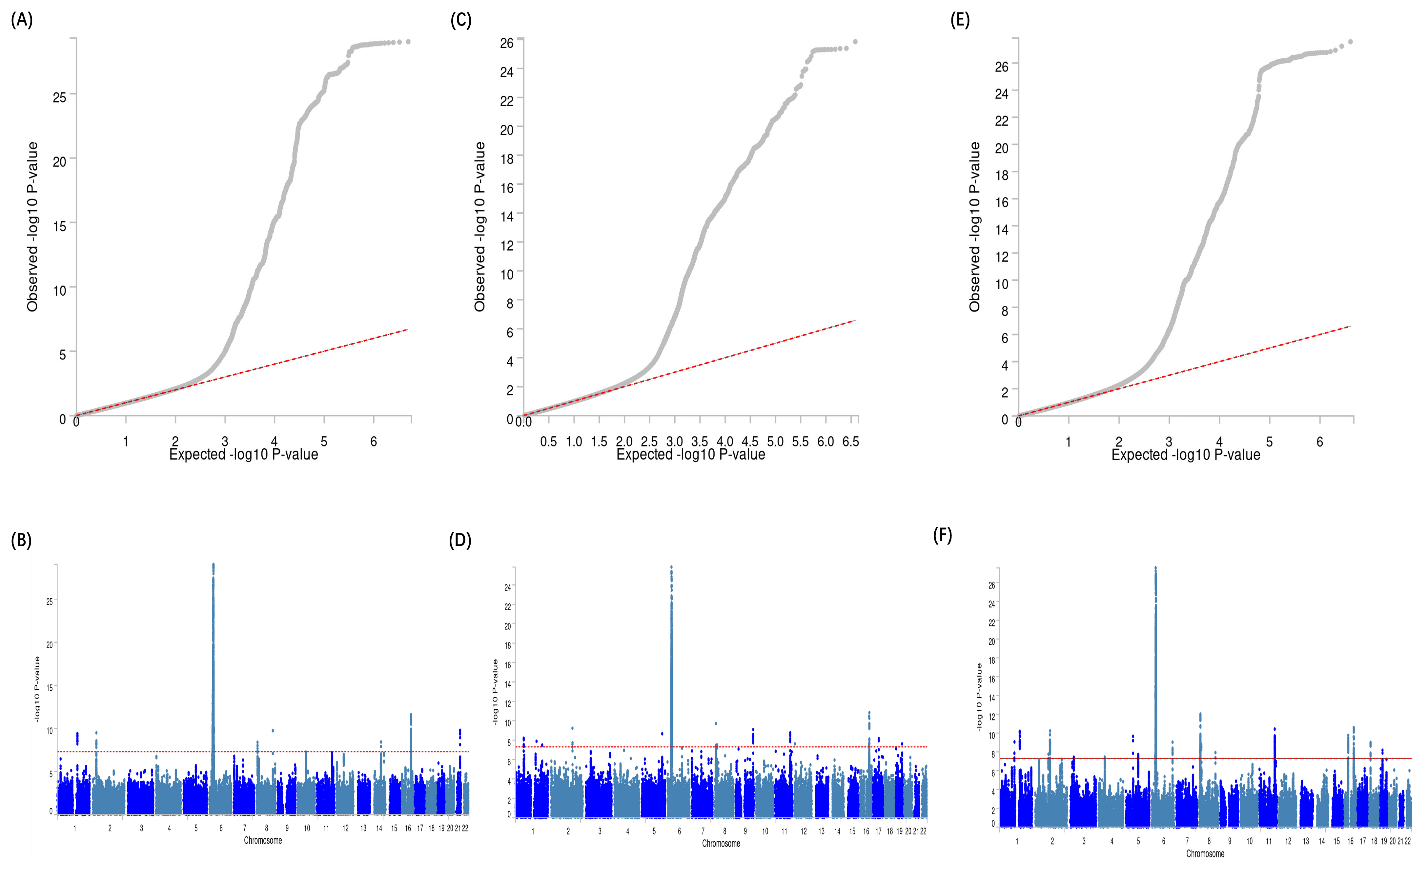


**Figure S1.** QQ and Manhattan plot of the PLACO results. Note: Red line represents the significance of 5×10-8. Abbreviations: GlycA, Glycoprotein acetyls; RA, Rheumatoid arthritis; AS, Ankylosing spondylitis; PsA, Psoriatic arthritis.


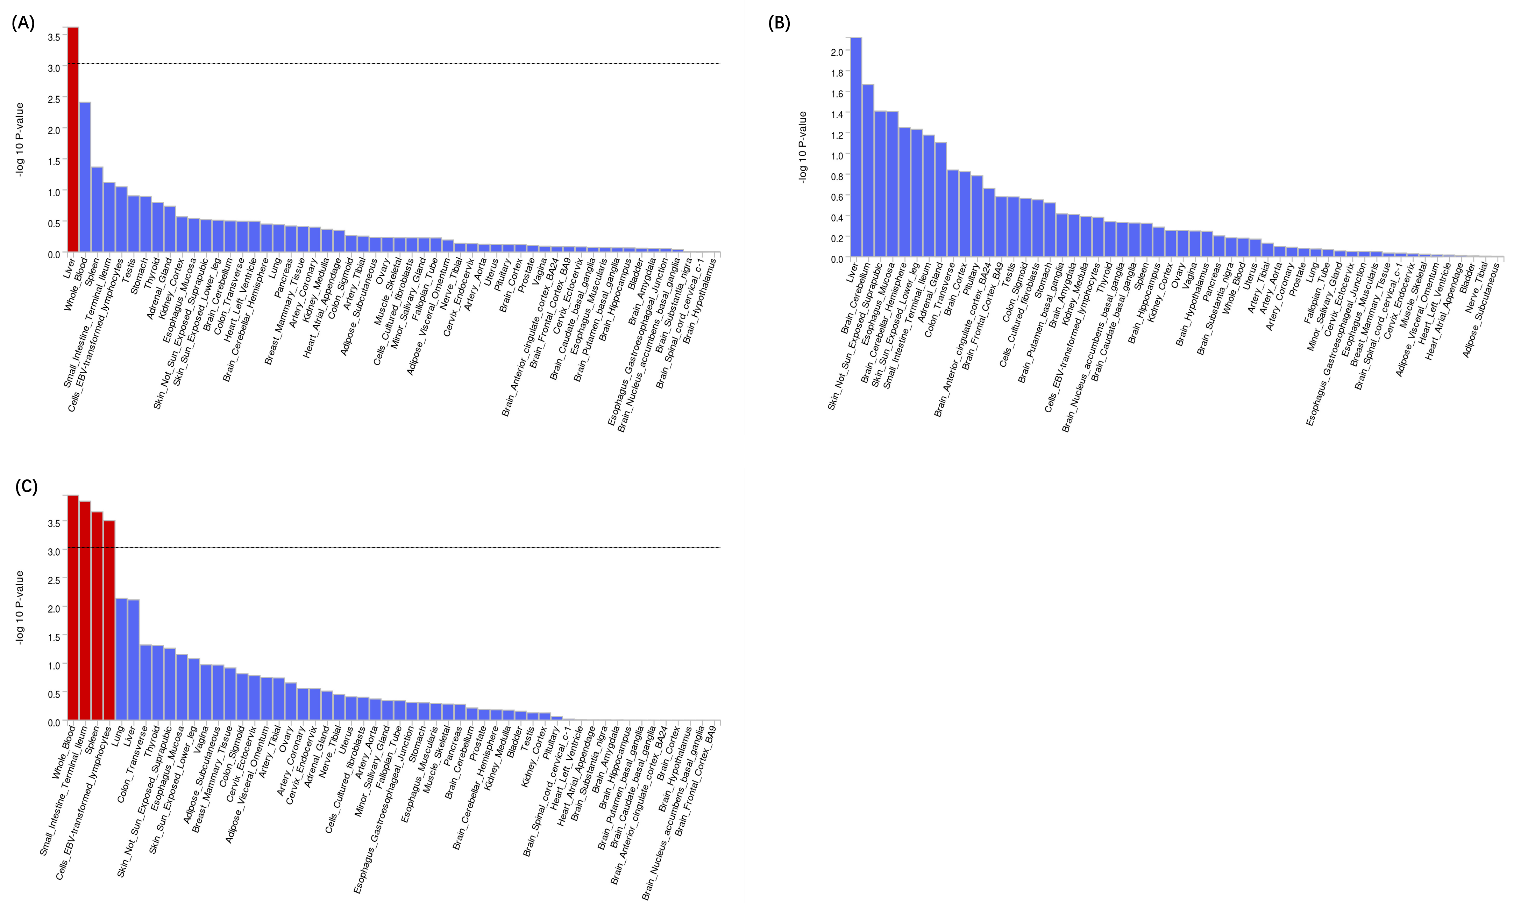


**Figure S2.** Figure S11. Gene-set enrichment for identified pleiotropic genes. Red panels represent significant tissues after Bonferroni adjustment. Abbreviations: DEG, differentially expressed genes.


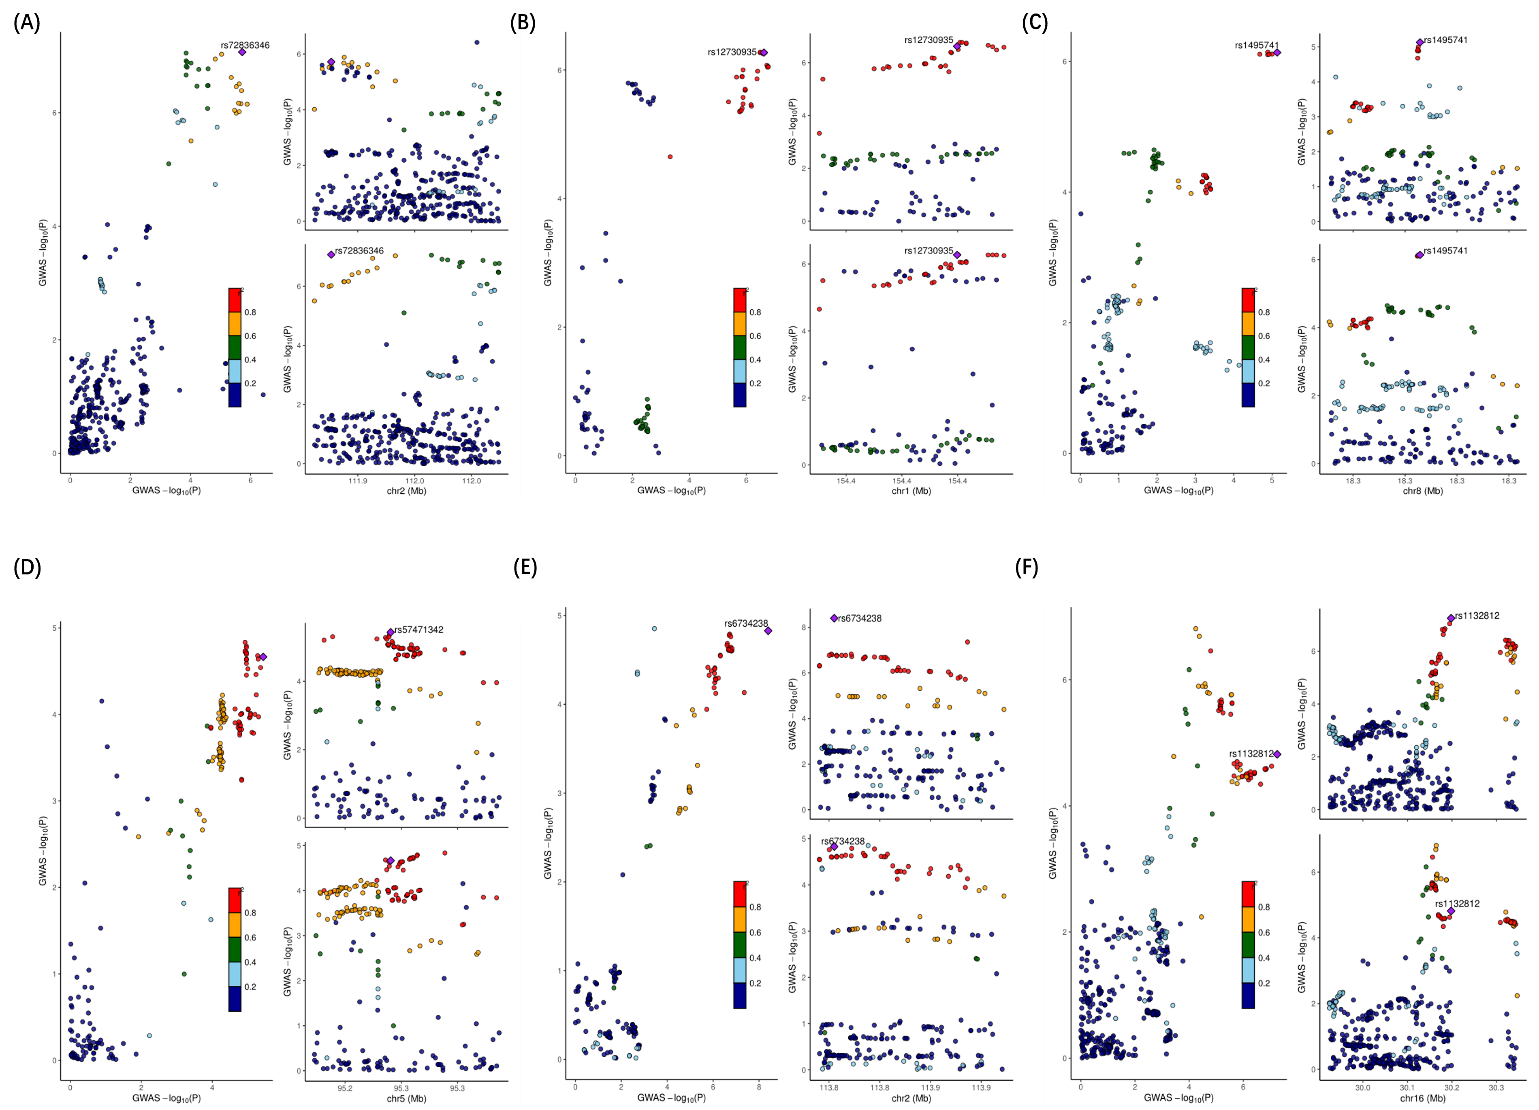


**Figure S3.** Regional plots of each colocalized locus (PP.H4 > 0.7) identified for corresponding trait pair (GlycA&RA) by using the PLACO. **Note:** PP.H4 was posterior probability of H4 calculated by coloc analysis.


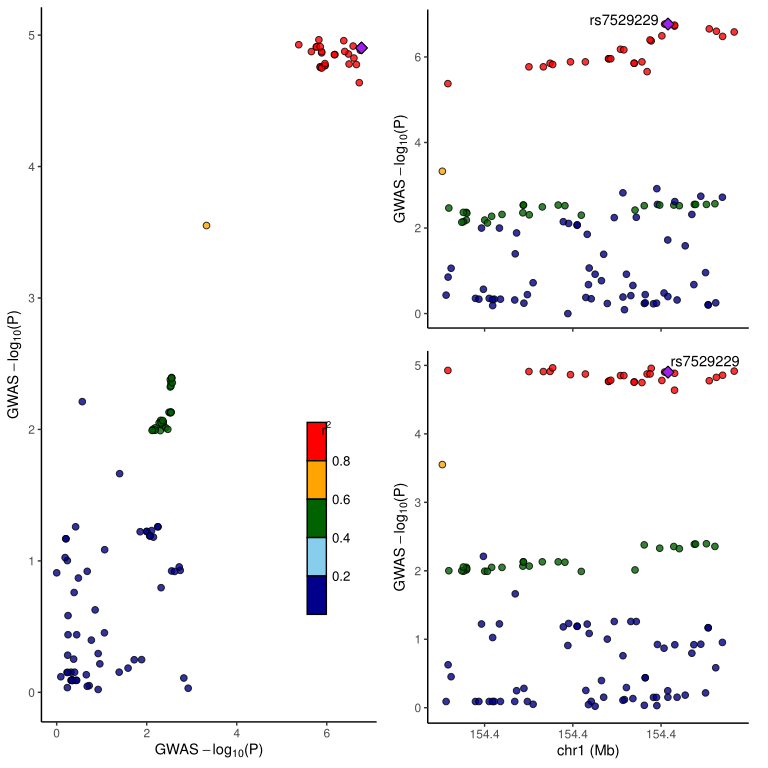


**Figure S4.** Regional plots of each colocalized locus (PP.H4 > 0.7) identified for corresponding trait pair (GlycA&PsA) by using the PLACO. **Note:** PP.H4 was posterior probability of H4 calculated by coloc analysis.


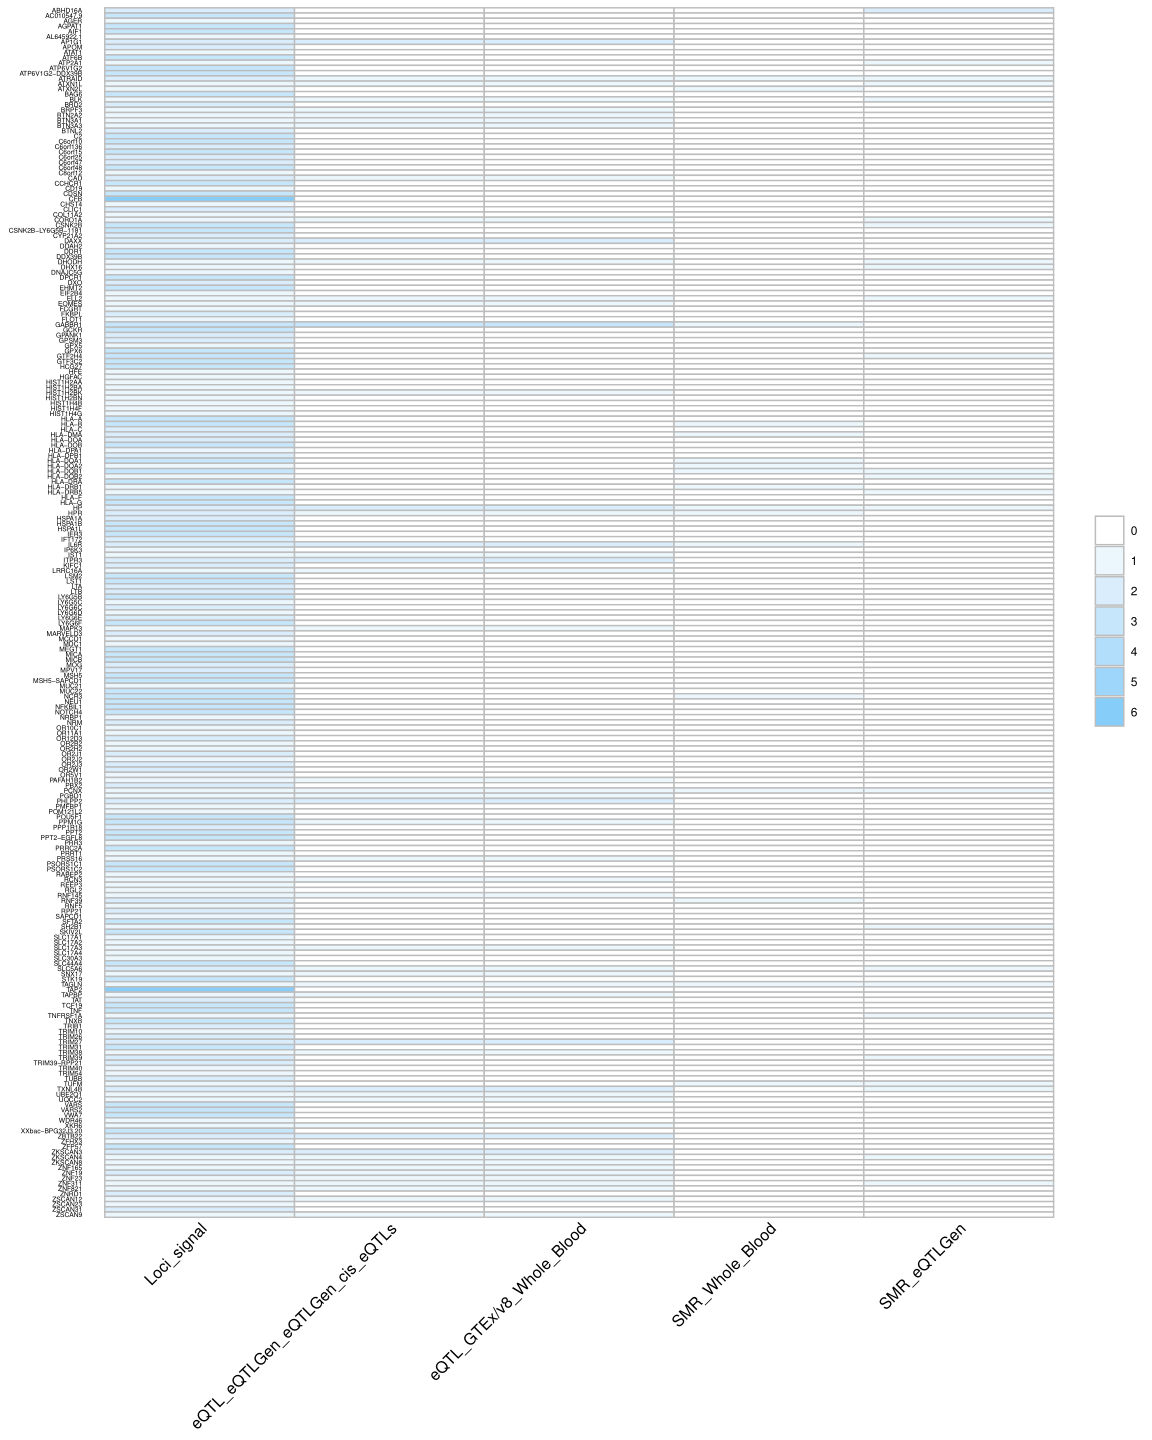


**Figure S5.** Overview of pleiotropic genes for the IA and GlycA. Note: The signals represent hits of genes across different trait pairs. Abbreviations: eQTL expression quantitative trait loci; SMR summary-based Mendelian randomization
