# Supplementary material
Source: Research Square preprint supplement (doi:10.21203/rs.3.rs-9501332/v1)
Supplement: Supplementary file 2 [file e5733eb771ea1585d6e58c65.xlsx]

## Sheet: Table S1
Table S1. Data sources
Note: The sample size of all GWAS summary-level datasets used in our analysis and corresponding references .
Phenotypes	Sample Size	Reference
	(case/control)	(PMID/Trait)
Glycoprotein acetyls (GlycA)	115078	met-d-GlycA
Rheumatoid Arthritis (RA)	12,931/57,196	36333501
Ankylosing Spondylitis (AS)	37037	FinnGen
Psoriatic Arthritis (PsA)	53657	35507331

## Sheet: HDL
V1	V2	V3	V4
logtxt.1	CZ_AD_Asthma_2022CellGenom_maf_GRCh37_qc_Blood_B_ALL_2019NC.txt	0.207946	0.0578716	0.000326595
logtxt.1	CZ_AD_Asthma_adultonset_2019AJHG_maf_GRCh37_Blood_B_ALL_2019NC.txt	0.159224	0.0616408	0.00979189
logtxt.1	CZ_AD_Asthma_childonset_2019AJHG_maf_GRCh37_Blood_B_ALL_2019NC.txt	-0.0116163	0.0557132	0.834837
logtxt.1	CZ_AD_Crohn_disease_2017LangeNG_Blood_B_ALL_2019NC.txt	0.0627384	0.0619655	0.311312
logtxt.1	CZ_AD_Graves_disease_2021Sakaue_Blood_B_ALL_2019NC.txt	0.0115197	0.133293	0.93113
logtxt.1	CZ_AD_Hashimoto_Disease_2021Sakaue_Blood_B_ALL_2019NC.txt	0.28125	0.165336	0.0889277
logtxt.1	CZ_AD_Hypothyroidism_2021Sakaue_Blood_B_ALL_2019NC.txt	0.171127	0.0648243	0.00829411
logtxt.1	CZ_AD_Inflammatory_bowel_disease_2017LangeNG_Blood_B_ALL_2019NC.txt	0.0495949	0.0533464	0.352538
logtxt.1	CZ_AD_Multiple_Sclerosis_2018_qc_Blood_B_ALL_2019NC.txt	0.142497	0.0573814	0.0130159
logtxt.1	CZ_AD_PBC_2021Cordell_Blood_B_ALL_2019NC.txt	0.205437	0.104193	0.0486443
logtxt.1	CZ_AD_Primary_sclerosing_cholangitis2016_Blood_B_ALL_2019NC.txt	#NAME?	NA	NA
logtxt.1	CZ_AD_Rheumatoid_Arthritis_European_2014_nature_Blood_B_ALL_2019NC.txt	0.253594	0.0831542	0.00229084
logtxt.1	CZ_AD_Rheumatoid_Arthritis_European_2022_NG_Blood_B_ALL_2019NC.txt	0.213864	0.0665844	0.00131849
logtxt.1	CZ_AD_Rheumatoid_Arthritis_pos_European_2022_NG_Blood_B_ALL_2019NC.txt	0.25926	0.0732335	0.000399857
logtxt.1	CZ_AD_Systemic_Lupus_Erythematosus_2015_NG_Blood_B_ALL_2019NC.txt	0.00790359	0.0761428	0.917328
logtxt.1	CZ_AD_T1D_2020_Diabetes_Blood_B_ALL_2019NC.txt	-0.136245	0.0611013	0.025759
logtxt.1	CZ_AD_Ulcerative_Colitis_2017LangeNG_Blood_B_ALL_2019NC.txt	0.0253819	0.0619823	0.682171
logtxt.1	CZ_AD_systemic_sclerosis_Blood_B_ALL_2019NC.txt	Inf	NA	NA
logtxt.1	CZ_AD_vitiligo_NG_2016_Blood_B_ALL_2019NC.txt	0.0259407	0.0656474	0.692731

## Sheet: LDSC
group	res	Trait 1	Trait 2	rg	se	z	p	h2_obs	h2_obs_se	h2_int	h2_int_se	gcov_int	gcov_int_se
res.1	hapmap3_withintercept	Blood_B_ALL_2019NC	AD_Asthma_adultonset_2019AJHG_maf_GRCh37	0.1558	0.0776	2.0076	0.0447	0.04	0.0034	1.0242	0.0106	0.0025	0.0055
res.2	hapmap3_nointercept	Blood_B_ALL_2019NC	AD_Asthma_adultonset_2019AJHG_maf_GRCh37	0.1074	0.034	3.1614	0.0016	0.0446	0.0026	1	NA	0	NA
res.3	1000G_withintercept	Blood_B_ALL_2019NC	AD_Asthma_adultonset_2019AJHG_maf_GRCh37	0.0677	0.1049	0.6453	0.5187	0.0533	0.0057	1.0001	0.018	0.0033	0.0077
res.4	1000G_nointercept	Blood_B_ALL_2019NC	AD_Asthma_adultonset_2019AJHG_maf_GRCh37	0.0625	0.0386	1.6177	0.1057	0.0533	0.0035	1	NA	0	NA
res.11	hapmap3_withintercept	Blood_B_ALL_2019NC	AD_Asthma_childonset_2019AJHG_maf_GRCh37	0.0461	0.0733	0.6294	0.5291	0.068	0.0088	1.0174	0.0203	-0.0051	0.0058
res.21	hapmap3_nointercept	Blood_B_ALL_2019NC	AD_Asthma_childonset_2019AJHG_maf_GRCh37	0.0004	0.0298	0.0145	0.9884	0.0716	0.0058	1	NA	0	NA
res.31	1000G_withintercept	Blood_B_ALL_2019NC	AD_Asthma_childonset_2019AJHG_maf_GRCh37	0.0647	0.1115	0.5801	0.5619	0.0796	0.0109	1.0031	0.0307	-0.0091	0.0093
res.41	1000G_nointercept	Blood_B_ALL_2019NC	AD_Asthma_childonset_2019AJHG_maf_GRCh37	-0.0168	0.0364	-0.4626	0.6436	0.0804	0.007	1	NA	0	NA
res.12	hapmap3_withintercept	Blood_B_ALL_2019NC	AD_Crohn_disease_2017LangeNG	0.2341	0.1009	2.319	0.0204	1.2575	0.1341	1.0911	0.0163	0.0059	0.0059
res.22	hapmap3_nointercept	Blood_B_ALL_2019NC	AD_Crohn_disease_2017LangeNG	0.1598	0.0332	4.8168	1.4586e-06	1.6602	0.1206	1	NA	0	NA
res.32	1000G_withintercept	Blood_B_ALL_2019NC	AD_Crohn_disease_2017LangeNG	0.2676	0.1051	2.5471	0.0109	1.3856	0.1729	1.0987	0.0259	-0.0008	0.0075
res.42	1000G_nointercept	Blood_B_ALL_2019NC	AD_Crohn_disease_2017LangeNG	0.1339	0.0325	4.1255	3.6991e-05	1.9002	0.1446	1	NA	0	NA
res.13	hapmap3_withintercept	Blood_B_ALL_2019NC	AD_Graves_disease_2021Sakaue	0.0245	0.1507	0.1628	0.8707	0.0057	0.0012	0.9967	0.0073	0.0028	0.0056
res.23	hapmap3_nointercept	Blood_B_ALL_2019NC	AD_Graves_disease_2021Sakaue	0.0618	0.0671	0.9213	0.3569	0.0053	0.0009	1	NA	0	NA
res.33	1000G_withintercept	Blood_B_ALL_2019NC	AD_Graves_disease_2021Sakaue	0.2439	0.3391	0.7193	0.4719	0.0033	0.0017	1.0097	0.0089	-0.0016	0.0074
res.43	1000G_nointercept	Blood_B_ALL_2019NC	AD_Graves_disease_2021Sakaue	0.0882	0.1115	0.7912	0.4288	0.0048	0.0012	1	NA	0	NA
res.14	hapmap3_withintercept	Blood_B_ALL_2019NC	AD_Hashimoto_Disease_2021Sakaue	0.2561	0.1449	1.7677	0.0771	0.0087	0.0017	1.0539	0.009	-0.0038	0.0049
res.24	hapmap3_nointercept	Blood_B_ALL_2019NC	AD_Hashimoto_Disease_2021Sakaue	0.0846	0.0404	2.0949	0.0362	0.0165	0.0015	1	NA	0	NA
res.34	1000G_withintercept	Blood_B_ALL_2019NC	AD_Hashimoto_Disease_2021Sakaue	0.2866	0.2245	1.2766	0.2017	0.0087	0.0024	1.0563	0.0121	-0.0047	0.007
res.44	1000G_nointercept	Blood_B_ALL_2019NC	AD_Hashimoto_Disease_2021Sakaue	0.0636	0.044	1.4442	0.1487	0.0225	0.0023	1	NA	0	NA
res.15	hapmap3_withintercept	Blood_B_ALL_2019NC	AD_Hypothyroidism_2021Sakaue	0.1665	0.0808	2.0609	0.0393	0.036	0.0036	1.0306	0.0107	0.0065	0.0056
res.25	hapmap3_nointercept	Blood_B_ALL_2019NC	AD_Hypothyroidism_2021Sakaue	0.1382	0.0322	4.2922	1.769e-05	0.041	0.0028	1	NA	0	NA
res.35	1000G_withintercept	Blood_B_ALL_2019NC	AD_Hypothyroidism_2021Sakaue	0.1558	0.1092	1.4266	0.1537	0.0401	0.0042	1.0213	0.0158	0.0061	0.0071
res.45	1000G_nointercept	Blood_B_ALL_2019NC	AD_Hypothyroidism_2021Sakaue	0.1284	0.0343	3.7437	0.0002	0.0442	0.0032	1	NA	0	NA
res.16	hapmap3_withintercept	Blood_B_ALL_2019NC	AD_Inflammatory_bowel_disease_2017LangeNG	0.1751	0.0819	2.1384	0.0325	0.3087	0.0292	1.1246	0.0155	0.0215	0.0056
res.26	hapmap3_nointercept	Blood_B_ALL_2019NC	AD_Inflammatory_bowel_disease_2017LangeNG	0.1992	0.0301	6.6184	3.6299e-11	0.4496	0.0249	1	NA	0	NA
res.36	1000G_withintercept	Blood_B_ALL_2019NC	AD_Inflammatory_bowel_disease_2017LangeNG	0.2143	0.0952	2.2498	0.0245	0.3559	0.038	1.1275	0.0235	0.0137	0.0073
res.46	1000G_nointercept	Blood_B_ALL_2019NC	AD_Inflammatory_bowel_disease_2017LangeNG	0.1823	0.0321	5.6807	1.3415e-08	0.5108	0.0293	1	NA	0	NA
res.17	hapmap3_withintercept	Blood_B_ALL_2019NC	AD_Multiple_Sclerosis_2018_qc	0.2186	0.0835	2.6184	0.0088	0.1727	0.0177	1.0189	0.0112	0.0261	0.0054
res.27	hapmap3_nointercept	Blood_B_ALL_2019NC	AD_Multiple_Sclerosis_2018_qc	0.3038	0.0367	8.286	1.1714e-16	0.1898	0.0137	1	NA	0	NA
res.37	1000G_withintercept	Blood_B_ALL_2019NC	AD_Multiple_Sclerosis_2018_qc	0.103	0.0922	1.1174	0.2638	0.2103	0.0213	1.0151	0.0144	0.0327	0.0067
res.47	1000G_nointercept	Blood_B_ALL_2019NC	AD_Multiple_Sclerosis_2018_qc	0.2726	0.0389	7.0153	2.2942e-12	0.2265	0.0138	1	NA	0	NA
res.18	hapmap3_withintercept	Blood_B_ALL_2019NC	AD_PBC_2021Cordell	0.0905	0.0967	0.9355	0.3495	0.4676	0.0705	0.9386	0.0172	0.0517	0.007
res.28	hapmap3_nointercept	Blood_B_ALL_2019NC	AD_PBC_2021Cordell	0.4629	0.0782	5.9213	3.1939e-09	0.3352	0.049	1	NA	0	NA
res.38	1000G_withintercept	Blood_B_ALL_2019NC	AD_PBC_2021Cordell	0.0391	0.1455	0.2685	0.7883	0.7433	0.1642	0.8868	0.0424	0.0576	0.0097
res.48	1000G_nointercept	Blood_B_ALL_2019NC	AD_PBC_2021Cordell	0.4797	0.0882	5.4406	5.3095e-08	0.4318	0.0594	1	NA	0	NA
res.19	hapmap3_withintercept	Blood_B_ALL_2019NC	AD_Pernicious_Anemia	-0.0732	0.3287	-0.2227	0.8238	0.0015	0.0014	1.0045	0.007	0.0026	0.005
res.29	hapmap3_nointercept	Blood_B_ALL_2019NC	AD_Pernicious_Anemia	0.0307	0.1168	0.2627	0.7928	0.0022	0.001	1	NA	0	NA
res.39	1000G_withintercept	Blood_B_ALL_2019NC	AD_Pernicious_Anemia	-0.0362	0.4451	-0.0814	0.9351	0.002	0.0025	1.0037	0.0097	0.0021	0.0071
res.49	1000G_nointercept	Blood_B_ALL_2019NC	AD_Pernicious_Anemia	0.0398	0.1113	0.3577	0.7206	0.0036	0.0016	1	NA	0	NA
res.110	hapmap3_withintercept	Blood_B_ALL_2019NC	AD_Primary_sclerosing_cholangitis2016	-0.072	0.1277	-0.5636	0.573	0.3189	0.0572	0.9416	0.0103	0.0054	0.0058
res.210	hapmap3_nointercept	Blood_B_ALL_2019NC	AD_Primary_sclerosing_cholangitis2016	0.0174	0.0831	0.2096	0.8339	0.1236	0.0366	1	NA	0	NA
res.310	1000G_withintercept	Blood_B_ALL_2019NC	AD_Primary_sclerosing_cholangitis2016	NA	NA	NA	NA	NA	NA	NA	NA	NA	NA
res.410	1000G_nointercept	Blood_B_ALL_2019NC	AD_Primary_sclerosing_cholangitis2016	-0.0425	0.1381	-0.3078	0.7583	0.06	0.0417	1	NA	0	NA
res.111	hapmap3_withintercept	Blood_B_ALL_2019NC	AD_Rheumatoid_Arthritis_European_2022_NG	0.3831	0.1007	3.8041	0.0001	0.1182	0.012	1.0761	0.0111	-0.0001	0.0056
res.211	hapmap3_nointercept	Blood_B_ALL_2019NC	AD_Rheumatoid_Arthritis_European_2022_NG	0.1981	0.0335	5.9091	3.4395e-09	0.1674	0.0099	1	NA	0	NA
res.311	1000G_withintercept	Blood_B_ALL_2019NC	AD_Rheumatoid_Arthritis_European_2022_NG	0.3052	0.1271	2.4013	0.0163	0.1431	0.0141	1.0699	0.0174	0.0011	0.0071
res.411	1000G_nointercept	Blood_B_ALL_2019NC	AD_Rheumatoid_Arthritis_European_2022_NG	0.1622	0.034	4.7666	1.8737e-06	0.1956	0.0107	1	NA	0	NA
res.112	hapmap3_withintercept	Blood_B_ALL_2019NC	AD_Rheumatoid_Arthritis_pos_European_2022_NG	0.3601	0.1021	3.5265	0.0004	0.1115	0.0126	1.0791	0.0108	0.0035	0.0054
res.212	hapmap3_nointercept	Blood_B_ALL_2019NC	AD_Rheumatoid_Arthritis_pos_European_2022_NG	0.2056	0.0352	5.8487	4.9544e-09	0.1625	0.0104	1	NA	0	NA
res.312	1000G_withintercept	Blood_B_ALL_2019NC	AD_Rheumatoid_Arthritis_pos_European_2022_NG	0.2854	0.13	2.1948	0.0282	0.1303	0.0141	1.0778	0.0179	0.003	0.0072
res.412	1000G_nointercept	Blood_B_ALL_2019NC	AD_Rheumatoid_Arthritis_pos_European_2022_NG	0.1594	0.0348	4.5832	4.5783e-06	0.1887	0.0115	1	NA	0	NA
res.113	hapmap3_withintercept	Blood_B_ALL_2019NC	AD_Systemic_Lupus_Erythematosus_2015_NG	0.0643	0.1166	0.5513	0.5814	0.3075	0.0382	1.1974	0.0099	0.0031	0.0063
res.213	hapmap3_nointercept	Blood_B_ALL_2019NC	AD_Systemic_Lupus_Erythematosus_2015_NG	0.0442	0.0269	1.6398	0.101	0.8633	0.0337	1	NA	0	NA
res.313	1000G_withintercept	Blood_B_ALL_2019NC	AD_Systemic_Lupus_Erythematosus_2015_NG	-0.0689	0.1324	-0.5203	0.6029	0.4832	0.0815	1.1729	0.0181	0.0057	0.0081
res.413	1000G_nointercept	Blood_B_ALL_2019NC	AD_Systemic_Lupus_Erythematosus_2015_NG	-0.0011	0.0309	-0.035	0.9721	1.0677	0.0468	1	NA	0	NA
res.114	hapmap3_withintercept	Blood_B_ALL_2019NC	AD_T1D_2020_Diabetes	-0.0314	0.1364	-0.2302	0.8179	0.1427	0.0312	1.1285	0.0098	0.0229	0.0049
res.214	hapmap3_nointercept	Blood_B_ALL_2019NC	AD_T1D_2020_Diabetes	0.1549	0.035	4.4204	9.8539e-06	0.4562	0.0222	1	NA	0	NA
res.314	1000G_withintercept	Blood_B_ALL_2019NC	AD_T1D_2020_Diabetes	0.0879	0.2011	0.4373	0.6619	0.1282	0.0582	1.1399	0.0122	0.0216	0.0067
res.414	1000G_nointercept	Blood_B_ALL_2019NC	AD_T1D_2020_Diabetes	0.1823	0.0352	5.1837	2.1757e-07	0.5803	0.0431	1	NA	0	NA
res.115	hapmap3_withintercept	Blood_B_ALL_2019NC	AD_Ulcerative_Colitis_2017LangeNG	0.0809	0.0838	0.965	0.3346	0.7869	0.0891	1.0981	0.0144	0.0275	0.0054
res.215	hapmap3_nointercept	Blood_B_ALL_2019NC	AD_Ulcerative_Colitis_2017LangeNG	0.2033	0.0321	6.3335	2.3971e-10	1.2288	0.0672	1	NA	0	NA
res.315	1000G_withintercept	Blood_B_ALL_2019NC	AD_Ulcerative_Colitis_2017LangeNG	0.1613	0.1065	1.5146	0.1299	0.964	0.1191	1.0933	0.0175	0.0182	0.0071
res.415	1000G_nointercept	Blood_B_ALL_2019NC	AD_Ulcerative_Colitis_2017LangeNG	0.1954	0.0335	5.8301	5.5389e-09	1.461	0.0813	1	NA	0	NA
res.116	hapmap3_withintercept	Blood_B_ALL_2019NC	AD_systemic_sclerosis	0.2118	0.1664	1.273	0.203	0.1114	0.0216	1.0473	0.0082	0.0263	0.0052
res.216	hapmap3_nointercept	Blood_B_ALL_2019NC	AD_systemic_sclerosis	0.3405	0.0521	6.5307	6.5478e-11	0.2042	0.014	1	NA	0	NA
res.316	1000G_withintercept	Blood_B_ALL_2019NC	AD_systemic_sclerosis	0.3465	0.1873	1.8505	0.0642	0.1716	0.0375	1.0288	0.0109	0.022	0.0067
res.416	1000G_nointercept	Blood_B_ALL_2019NC	AD_systemic_sclerosis	0.3898	0.0582	6.7014	2.064e-11	0.2482	0.0219	1	NA	0	NA
res.117	hapmap3_withintercept	Blood_B_ALL_2019NC	AD_vitiligo_NG_2016	0.0315	0.0969	0.3251	0.7451	0.1723	0.021	1.1329	0.0104	-0.0126	0.0055
res.217	hapmap3_nointercept	Blood_B_ALL_2019NC	AD_vitiligo_NG_2016	-0.0653	0.0294	-2.2229	0.0262	0.3613	0.016	1	NA	0	NA
res.317	1000G_withintercept	Blood_B_ALL_2019NC	AD_vitiligo_NG_2016	-0.0747	0.1237	-0.6037	0.5461	0.2385	0.0305	1.1132	0.0128	-0.0055	0.0074
res.417	1000G_nointercept	Blood_B_ALL_2019NC	AD_vitiligo_NG_2016	-0.0667	0.0332	-2.0108	0.0443	0.4246	0.0197	1	NA	0	NA

## Sheet: Table S2
Table S2 Genetic correlation analysis conducted by LDSC and HDL
Note: rg represents genetic correlation coefficients; Abbreviations: SE, standard error; FDR, False discovery rate; GlycA, Glycoprotein acetyls; RA, Rheumatoid arthritis; AS, Ankylosing spondylitis; PsA, Psoriatic arthritis.
Trait pairs	Trait 1	LDSC																		HDL
		rg	se	z	low	up	rg(SE)	p	h2_obs	h2_obs_se	h2_int	h2_int_se	gcov_int	gcov_int_se	Intercept (SE)	Z	FDR	Bonferroni		rg	se	rg(SE)	P
GlycA&PsA	B-ALL	0.1558	0.0776	2.0076	0.003704	0.307896	0.175(0.056)	0.0018	0.04	0.0034	1.0242	0.0106	-0.0045	0.0051	1.012 (0.0186)	3.1169	0.0036	0.0054		0.159224	0.0616408	0.153 (0.043)	0.000354
GlycA&RA	B-ALL	0.0461	0.0733	0.6294	-0.097568	0.189768	0.109(0.037)	0.0036	0.068	0.0088	1.0174	0.0203	0.0055	0.0057	1.060 (0.0137)	2.9119	0.0036	0.0108		-0.0116163	0.0557132	0.102 (0.026)	7.54e-05
GlycA&AS	B-ALL	0.0315	0.0969	0.3251	-0.158424	0.221424	0.173(0.059)	0.0032	0.1723	0.021	1.1329	0.0104	0.0034	0.0054	1.052 (0.0168)	2.9473	0.0036	0.0096		0.0259407	0.0656474	0.193 (0.079)	0.0151
				0.003125

## Sheet: Table S3
Table S3 Local genetic correlation analysis conducted by LAVA
Note: rho represents genetic correlation coefficients; Abbreviations: FDR, False discovery rate; GlycA, Glycoprotein acetyls; RA, Rheumatoid arthritis; AS, Ankylosing spondylitis; PsA, Psoriatic arthritis.
phen1	phen2	value	locus	chr	start	stop	n.snps	n.pcs	rho	rho.lower	rho.upper	r2	r2.lower	r2.upper	p	FDR	Bonferroni
GlycA	AS	0.488303	954	6	29529756	29833843	2234	53	0.488303	0.32439	0.65213	0.238439	0.10523	0.42527	2.46871e-07	6.85413e-06	0.000214778
GlycA	PsA	-0.88179	446	3	25516194	26905340	2808	267	-0.88179	-1	-0.46638	0.777553	0.21751	1	1.79268e-05	0.000161297	0.0155963
GlycA	PsA	-0.843361	1268	8	22895019	23788494	2602	281	-0.843361	-1	-0.43526	0.711257	0.18945	1	4.03874e-05	0.000295269	0.035137
GlycA	PsA	-0.909016	1640	11	27018308	28577718	2356	222	-0.909016	-1	-0.5261	0.82631	0.27679	1	3.01547e-06	4.16422e-05	0.00262346
GlycA	PsA	-0.687669	1727	11	122589225	123398882	2132	307	-0.687669	-1	-0.3562	0.472888	0.12688	1	4.30538e-05	0.000311415	0.0374568
GlycA	PsA	-0.869608	1873	13	28587126	30068525	3358	323	-0.869608	-1	-0.46313	0.756218	0.21449	1	1.56492e-05	0.000146251	0.0136148
GlycA	PsA	-0.685038	2242	18	3722829	4603961	2252	340	-0.685038	-1	-0.36978	0.469277	0.13674	1	1.864e-05	0.000161297	0.0162168
GlycA	PsA	-0.745421	2301	18	73568261	74471745	2744	327	-0.745421	-1	-0.42241	0.555652	0.17843	1	6.24276e-06	7.33946e-05	0.0054312
GlycA	PsA	-0.650436	2366	19	56411087	57143509	2120	308	-0.650436	-1	-0.36313	0.423067	0.13186	1	9.75736e-06	0.000102276	0.0084889
GlycA	PsA	-0.642479	2463	22	17587475	18535225	2721	345	-0.642479	-1	-0.34037	0.412779	0.11585	1	2.22825e-05	0.000177558	0.0193858
GlycA	RA	0.459085	954	6	29529756	29833843	2234	53	0.459085	0.27984	0.63848	0.210759	0.07831	0.40765	4.31859e-06	5.36583e-05	0.00375717
GlycA	RA	0.434712	956	6	30070718	30715006	2278	93	0.434712	0.28963	0.57234	0.188974	0.08388	0.32758	2.40367e-08	1.67276e-06	2.09119e-05
GlycA	RA	0.288235	962	6	32208902	32454577	1971	52	0.288235	0.16759	0.40514	0.0830792	0.02809	0.16414	3.72734e-06	4.91331e-05	0.00324279
GlycA	RA	0.334579	965	6	32586785	32629239	696	101	0.334579	0.20728	0.4638	0.111943	0.04296	0.21511	2.93553e-06	4.16422e-05	0.00255391
GlycA	RA	-0.527488	2148	16	69549150	71062712	1839	205	-0.527488	-0.79897	-0.31288	0.278244	0.09789	0.63835	4.37901e-06	5.36583e-05	0.00380974
PsA	AS	-0.731409	16	1	14720132	15755230	2970	354	-0.731409	-1	-0.45507	0.534958	0.20708	1	6.74918e-08	3.2621e-06	5.87179e-05
PsA	AS	-0.880642	38	1	41093876	41977966	2100	235	-0.880642	-1	-0.48216	0.77553	0.23248	1	4.15509e-06	5.23903e-05	0.00361493
PsA	AS	-0.645458	53	1	61377616	62778733	3235	337	-0.645458	-1	-0.34352	0.416616	0.11801	1	1.37448e-05	0.000132866	0.011958
PsA	AS	-0.733213	55	1	64344227	65894184	3092	300	-0.733213	-1	-0.39686	0.537602	0.1575	1	8.16431e-06	8.87869e-05	0.00710295
PsA	AS	-0.830703	70	1	80781443	82123368	3379	302	-0.830703	-1	-0.47741	0.690068	0.22792	1	1.41714e-06	2.37098e-05	0.00123291
PsA	AS	-0.953701	82	1	94168577	95122541	2024	219	-0.953701	-1	-0.58815	0.909545	0.34592	1	1.65777e-07	5.54715e-06	0.000144226
PsA	AS	-1	192	1	241033585	241813534	1893	280	-1	-1	-0.60906	1	0.37095	1	2.73743e-09	4.28535e-07	2.38156e-06
PsA	AS	-0.900212	275	2	68877775	70756283	3411	304	-0.900212	-1	-0.5063	0.810382	0.25634	1	2.80342e-06	4.06496e-05	0.00243898
PsA	AS	-0.729829	279	2	73544291	75148103	2288	262	-0.729829	-1	-0.37258	0.532651	0.13882	1	3.28792e-05	0.000244486	0.0286049
PsA	AS	-1	286	2	79900056	80737811	1824	277	-1	-1	-0.6227	1	0.38775	1	5.6107e-08	2.87136e-06	4.88131e-05
PsA	AS	-0.522082	305	2	110097869	112644828	2686	298	-0.522082	-0.82652	-0.27561	0.272569	0.07596	0.68314	1.8939e-05	0.000161297	0.0164769
PsA	AS	-0.537978	407	2	230541093	231847386	3103	299	-0.537978	-0.86994	-0.27763	0.289421	0.07708	0.75679	2.60164e-05	0.000198546	0.0226343
PsA	AS	-0.859576	412	2	235625790	236276287	2053	290	-0.859576	-1	-0.48988	0.73887	0.23998	1	2.25758e-06	3.44578e-05	0.00196409
PsA	AS	-0.917633	425	3	3128153	4109393	3178	321	-0.917633	-1	-0.59814	0.84205	0.35777	1	1.52635e-08	1.32792e-06	1.32792e-05
PsA	AS	-0.856221	427	3	4835084	5496182	1704	313	-0.856221	-1	-0.51344	0.733115	0.26362	1	7.81131e-07	1.54451e-05	0.000679584
PsA	AS	-0.824644	428	3	5496183	6421145	3173	313	-0.824644	-1	-0.42145	0.680038	0.17762	1	2.70406e-05	0.000204568	0.0235253
PsA	AS	-0.694981	546	3	142976708	144408821	3198	286	-0.694981	-1	-0.36065	0.482999	0.13007	1	2.50066e-05	0.000192529	0.0217557
PsA	AS	-0.777744	584	3	186602046	187939199	3296	358	-0.777744	-1	-0.52713	0.604886	0.27786	1	2.80435e-09	4.28535e-07	2.43978e-06
PsA	AS	-1	648	4	47408266	49325138	2950	228	-1	-1	-0.57135	1	0.32644	1	4.11997e-07	1.05423e-05	0.000358437
PsA	AS	-0.838143	653	4	57103101	58011085	2547	257	-0.838143	-1	-0.42087	0.702484	0.17713	1	3.82983e-05	0.000282369	0.0333195
PsA	AS	-0.942866	768	4	184338585	185483262	3282	371	-0.942866	-1	-0.5354	0.888996	0.28666	1	7.21667e-07	1.49488e-05	0.00062785
PsA	AS	-0.835298	781	5	4636543	5828694	3249	347	-0.835298	-1	-0.44793	0.697722	0.20064	1	9.23139e-06	9.79428e-05	0.00803131
PsA	AS	-0.479116	915	5	166863414	168342743	2929	358	-0.479116	-0.76661	-0.23942	0.229552	0.05732	0.58769	4.33117e-05	0.000311415	0.0376812
PsA	AS	-0.853002	936	6	11790672	13352326	3492	321	-0.853002	-1	-0.51978	0.727612	0.27018	1	2.27019e-07	6.81057e-06	0.000197507
PsA	AS	-0.829193	944	6	20418021	21295864	2037	213	-0.829193	-1	-0.43411	0.68756	0.18845	1	3.09855e-05	0.000232391	0.0269574
PsA	AS	-0.644586	1067	6	143083348	144791455	3044	327	-0.644586	-0.98329	-0.38288	0.415491	0.1466	0.96687	6.35456e-07	1.41756e-05	0.000552847
PsA	AS	-1	1073	6	150635316	151629954	3149	318	-1	-1	-0.62905	1	0.39571	1	1.80719e-09	4.28535e-07	1.57226e-06
PsA	AS	-0.676077	1113	7	13676748	15013694	3342	351	-0.676077	-1	-0.35094	0.45708	0.12316	1	2.21927e-05	0.000177558	0.0193076
PsA	AS	-0.70222	1146	7	49632427	50894508	2997	247	-0.70222	-1	-0.37258	0.493114	0.13882	1	2.22818e-05	0.000177558	0.0193852
PsA	AS	-0.954135	1215	7	138755108	140217630	2917	326	-0.954135	-1	-0.57842	0.910374	0.33457	1	1.05799e-07	4.04104e-06	9.20451e-05
PsA	AS	-0.948109	1235	8	1628040	2070902	1575	311	-0.948109	-1	-0.53769	0.898911	0.28911	1	8.9138e-07	1.72333e-05	0.000775501
PsA	AS	-0.944451	1344	8	116094204	118300068	3294	326	-0.944451	-1	-0.5929	0.891988	0.35153	1	2.49952e-08	1.67276e-06	2.17458e-05
PsA	AS	-0.737416	1360	8	135313674	136220342	2244	262	-0.737416	-1	-0.4013	0.543782	0.16104	1	1.05299e-05	0.00010906	0.00916101
PsA	AS	-0.828012	1429	9	83455503	85135751	3122	315	-0.828012	-1	-0.43285	0.685604	0.18736	1	1.25787e-05	0.00012296	0.0109435
PsA	AS	-1	1443	9	97418634	98885862	2676	248	-1	-1	-0.60429	1	0.36516	1	4.44159e-09	4.83023e-07	3.86418e-06
PsA	AS	-0.964677	1486	10	1329233	1872960	1667	267	-0.964677	-1	-0.62359	0.930602	0.38886	1	1.86209e-08	1.47274e-06	1.62002e-05
PsA	AS	-0.782484	1490	10	3880323	4813182	2452	305	-0.782484	-1	-0.4545	0.612281	0.20657	1	1.0314e-06	1.87648e-05	0.000897318
PsA	AS	-0.895437	1492	10	5396243	6234718	2513	313	-0.895437	-1	-0.50292	0.801808	0.25293	1	2.62838e-06	3.87575e-05	0.00228669
PsA	AS	-0.896933	1553	10	71672998	72659223	2790	296	-0.896933	-1	-0.5265	0.804488	0.2772	1	9.95552e-07	1.87648e-05	0.00086613
PsA	AS	-0.768281	1631	11	19780785	20686336	2408	326	-0.768281	-1	-0.41967	0.590256	0.17613	1	7.9982e-06	8.86482e-05	0.00695843
PsA	AS	-0.943115	1653	11	40362941	41603195	2628	229	-0.943115	-1	-0.58769	0.889466	0.34538	1	2.38276e-07	6.85413e-06	0.0002073
PsA	AS	-0.800417	1673	11	62800369	64594822	2793	279	-0.800417	-1	-0.43065	0.640668	0.18546	1	1.19348e-05	0.000119348	0.0103833
PsA	AS	-0.768979	1678	11	69713997	71242834	3610	326	-0.768979	-1	-0.49151	0.591329	0.24158	1	4.61666e-08	2.51031e-06	4.01649e-05
PsA	AS	-1	1743	12	3069507	3871114	2324	325	-1	-1	-0.57496	1	0.33058	1	1.43203e-07	5.19111e-06	0.000124587
PsA	AS	-0.752853	1745	12	4967644	6023700	2457	326	-0.752853	-1	-0.4364	0.566787	0.19044	1	1.23911e-06	2.20005e-05	0.00107803
PsA	AS	-0.8583	1824	12	93487548	94385884	1908	271	-0.8583	-1	-0.47302	0.736678	0.22375	1	4.85852e-06	5.87071e-05	0.00422691
PsA	AS	-0.768442	1825	12	94385885	95147845	2056	288	-0.768442	-1	-0.43038	0.590503	0.18522	1	5.00462e-06	5.96441e-05	0.00435402
PsA	AS	-0.749555	1855	12	127545378	128372588	2165	311	-0.749555	-1	-0.39449	0.561833	0.15562	1	1.15448e-05	0.000117249	0.010044
PsA	AS	-0.810682	1859	12	130629841	131404042	2484	321	-0.810682	-1	-0.42971	0.657205	0.18465	1	1.21184e-05	0.000119807	0.010543
PsA	AS	-0.757413	1866	13	21540734	22795188	3168	356	-0.757413	-1	-0.42006	0.573675	0.17645	1	3.71832e-06	4.91331e-05	0.00323494
PsA	AS	-0.82341	1883	13	40091624	41003943	2100	280	-0.82341	-1	-0.46337	0.678003	0.21471	1	3.01035e-06	4.16422e-05	0.002619
PsA	AS	-0.932353	1884	13	41003944	42037054	1714	219	-0.932353	-1	-0.57866	0.869283	0.33484	1	2.09131e-07	6.69387e-06	0.000181944
PsA	AS	-0.682847	1937	13	98527336	99402294	2191	309	-0.682847	-1	-0.35561	0.466279	0.12646	1	2.32971e-05	0.000180969	0.0202685
PsA	AS	-0.694009	1941	13	103050418	104378435	3548	306	-0.694009	-1	-0.37994	0.481648	0.14435	1	8.36026e-06	8.97954e-05	0.00727343
PsA	AS	-0.787458	1945	13	107037865	108521978	3498	372	-0.787458	-1	-0.4758	0.62009	0.22639	1	2.52106e-07	6.85413e-06	0.000219332
PsA	AS	-0.795725	1955	14	20876081	21982654	2777	384	-0.795725	-1	-0.41268	0.633178	0.1703	1	2.26539e-05	0.000177558	0.0197089
PsA	AS	-0.901073	2027	14	100786190	102004377	2845	373	-0.901073	-1	-0.5593	0.811933	0.31281	1	4.32614e-08	2.50916e-06	3.76374e-05
PsA	AS	-0.758269	2047	15	36583328	37962915	3048	320	-0.758269	-1	-0.36638	0.574972	0.13424	1	5.57114e-05	0.000390878	0.0484689
PsA	AS	-0.794647	2050	15	40604781	42332685	2879	252	-0.794647	-1	-0.39921	0.631464	0.15937	1	5.2554e-05	0.000371723	0.045722
PsA	AS	-0.687091	2089	15	89385188	90632718	2520	322	-0.687091	-1	-0.41329	0.472094	0.17081	1	5.67728e-07	1.2998e-05	0.000493923
PsA	AS	-0.785255	2104	16	1996493	3379996	2152	341	-0.785255	-1	-0.44136	0.616625	0.1948	1	2.61073e-06	3.87575e-05	0.00227134
PsA	AS	-0.633363	2127	16	27443062	29043177	1956	289	-0.633363	-0.95992	-0.38118	0.401149	0.1453	0.92145	6.68803e-07	1.41917e-05	0.000581859
PsA	AS	-0.606388	2133	16	50467034	52041336	3039	346	-0.606388	-0.9971	-0.31631	0.367707	0.10005	0.99421	2.1373e-05	0.00017542	0.0185945
PsA	AS	-0.757811	2161	16	80559686	81437861	2754	308	-0.757811	-1	-0.4011	0.574277	0.16088	1	1.66543e-05	0.000152518	0.0144892
PsA	AS	-0.864695	2183	17	9619357	10572617	2613	333	-0.864695	-1	-0.50945	0.747698	0.25954	1	5.60041e-07	1.2998e-05	0.000487236
PsA	AS	-0.637458	2198	17	31318754	32356061	2715	331	-0.637458	-1	-0.33101	0.406353	0.10956	1	1.96423e-05	0.000164315	0.0170888
PsA	AS	-0.406299	2210	17	47516225	48722590	2253	349	-0.406299	-0.63279	-0.2181	0.165079	0.04757	0.40043	1.88517e-05	0.000161297	0.016401
PsA	AS	-1	2216	17	54950108	56245227	2702	374	-1	-1	-0.5893	1	0.34728	1	3.30656e-09	4.28535e-07	2.87671e-06
PsA	AS	-0.737132	2233	17	76596288	77412786	2484	352	-0.737132	-1	-0.40029	0.543363	0.16024	1	8.04966e-06	8.86482e-05	0.0070032
PsA	AS	-0.94523	2234	17	77412787	78438332	2302	326	-0.94523	-1	-0.57368	0.893459	0.3291	1	7.55651e-08	3.28708e-06	6.57416e-05
PsA	AS	-0.713978	2277	18	48228380	49790996	3144	304	-0.713978	-1	-0.39073	0.509764	0.15267	1	7.60586e-06	8.70671e-05	0.0066171
PsA	AS	-0.808752	2303	18	75240761	76231685	3120	327	-0.808752	-1	-0.4093	0.65408	0.16753	1	1.89081e-05	0.000161297	0.01645
PsA	AS	-0.680602	2307	19	762047	1515920	1860	336	-0.680602	-1	-0.36133	0.463219	0.13056	1	2.01571e-05	0.000167016	0.0175367
PsA	AS	-0.613548	2315	19	7249360	8199016	2398	314	-0.613548	-0.99338	-0.35777	0.376441	0.128	0.98681	1.79332e-06	2.88924e-05	0.00156019
PsA	AS	-0.701069	2351	19	45040933	45893307	1920	291	-0.701069	-1	-0.41966	0.491498	0.17611	1	5.61361e-07	1.2998e-05	0.000488384
PsA	AS	-1	2359	19	51903805	52678748	2461	269	-1	-1	-0.55902	1	0.31251	1	1.35035e-06	2.30354e-05	0.0011748
PsA	AS	-0.668851	2363	19	54602371	55182973	1767	306	-0.668851	-1	-0.34746	0.447362	0.12073	1	2.2483e-05	0.000177558	0.0195602
PsA	AS	-0.967041	2370	20	884242	1771285	2230	307	-0.967041	-1	-0.59762	0.935169	0.35715	1	7.27847e-08	3.28708e-06	6.33227e-05
PsA	AS	-1	2416	20	52411533	53120334	1999	256	-1	-1	-0.54995	1	0.30244	1	1.06832e-07	4.04104e-06	9.29438e-05
PsA	AS	-0.833622	2428	20	61470769	62179241	2162	290	-0.833622	-1	-0.48896	0.694926	0.23908	1	7.63831e-07	1.54451e-05	0.000664533
PsA	AS	-0.772773	2449	21	34383795	35729261	2562	309	-0.772773	-1	-0.44713	0.597177	0.19993	1	1.28745e-06	2.24016e-05	0.00112008
PsA	AS	-0.832951	2455	21	41344743	42187152	2462	291	-0.832951	-1	-0.45406	0.693807	0.20617	1	4.0304e-06	5.15654e-05	0.00350645
PsA	AS	-0.946047	2457	21	43081435	43812791	2599	346	-0.946047	-1	-0.61455	0.895006	0.37767	1	1.08201e-08	1.04594e-06	9.41349e-06
PsA	RA	-0.743499	130	1	172465154	173582511	1888	237	-0.743499	-1	-0.47795	0.55279	0.22844	1	8.09291e-08	3.35278e-06	7.04083e-05
PsA	RA	-0.811441	528	3	122340833	123518507	2311	268	-0.811441	-1	-0.44302	0.658437	0.19627	1	1.42723e-05	0.000136184	0.0124169
PsA	RA	-1	864	5	106389389	107265911	1981	254	-1	-1	-0.57646	1	0.33231	1	6.61843e-07	1.41917e-05	0.000575803
PsA	RA	-0.548085	888	5	132554691	134556570	3573	352	-0.548085	-0.88849	-0.2747	0.300397	0.07546	0.78942	5.72252e-05	0.000398287	0.0497859
PsA	RA	-0.63796	920	5	173606996	174662885	2922	349	-0.63796	-1	-0.34646	0.406993	0.12003	1	1.44011e-05	0.000136184	0.012529
PsA	RA	-0.710094	921	5	174662886	176180301	2767	345	-0.710094	-1	-0.38497	0.504233	0.1482	1	1.58018e-05	0.000146251	0.0137476
PsA	RA	-0.200102	958	6	31106494	31250556	1663	40	-0.200102	-0.2749	-0.12597	0.0400409	0.01587	0.07557	2.15435e-07	6.69387e-06	0.000187428
PsA	RA	-0.130632	959	6	31250557	31320268	1496	63	-0.130632	-0.18305	-0.07984	0.0170647	0.00637	0.03351	1.0353e-06	1.87648e-05	0.000900711
PsA	RA	-0.162426	960	6	31320269	31427209	1476	41	-0.162426	-0.22832	-0.09529	0.0263822	0.00908	0.05213	1.99682e-06	3.15861e-05	0.00173723
PsA	RA	0.190182	962	6	32208902	32454577	1971	52	0.190182	0.10871	0.27084	0.0361692	0.01182	0.07335	3.44642e-06	4.68498e-05	0.00299839
PsA	RA	0.359423	964	6	32539568	32586784	636	54	0.359423	0.24766	0.46531	0.129185	0.06134	0.21651	5.56354e-10	2.42014e-07	4.84028e-07
PsA	RA	-0.185675	966	6	32629240	32682213	1052	68	-0.185675	-0.25202	-0.12059	0.0344753	0.01454	0.06351	3.37096e-08	2.09481e-06	2.93274e-05
PsA	RA	-0.722311	1037	6	106053916	107309327	3169	312	-0.722311	-1	-0.4481	0.521733	0.20079	1	2.75503e-07	7.26326e-06	0.000239688
PsA	RA	-0.362585	1063	6	137553213	138825721	3116	309	-0.362585	-0.53947	-0.19265	0.131468	0.03711	0.29103	1.90961e-05	0.000161297	0.0166136
PsA	RA	-0.674584	1389	9	14244748	14902924	1840	317	-0.674584	-1	-0.37387	0.455064	0.13978	1	7.91402e-06	8.86482e-05	0.0068852
PsA	RA	-0.727587	1603	10	129831970	130694008	2498	336	-0.727587	-1	-0.38319	0.529383	0.14684	1	1.8577e-05	0.000161297	0.016162
PsA	RA	-0.814722	1726	11	121208187	122589224	2722	316	-0.814722	-1	-0.44697	0.663772	0.19978	1	1.15901e-05	0.000117249	0.0100834
PsA	RA	-0.963851	1873	13	28587126	30068525	3358	323	-0.963851	-1	-0.58498	0.929008	0.3422	1	4.94392e-07	1.22892e-05	0.000430121
PsA	RA	-0.700289	1941	13	103050418	104378435	3548	306	-0.700289	-1	-0.36124	0.490405	0.13049	1	4.49042e-05	0.000320218	0.0390667
PsA	RA	-0.891508	1999	14	68976913	69794542	1934	246	-0.891508	-1	-0.51778	0.794786	0.2681	1	3.87088e-06	5.02637e-05	0.00336767
PsA	RA	-0.842695	2011	14	82524786	84087372	3429	285	-0.842695	-1	-0.45157	0.710134	0.20392	1	1.8703e-05	0.000161297	0.0162716
PsA	RA	-0.898365	2023	14	97174315	98268391	2475	304	-0.898365	-1	-0.49482	0.807059	0.24484	1	6.91303e-06	8.01911e-05	0.00601434
PsA	RA	-1	2123	16	22667049	24014705	2906	302	-1	-1	-0.58685	1	0.34439	1	1.52627e-07	5.31142e-06	0.000132785
RA	AS	0.37772	954	6	29529756	29833843	2234	53	0.37772	0.30783	0.44625	0.142672	0.09476	0.19914	8.10755e-23	7.05357e-20	7.05357e-20
RA	AS	0.280668	955	6	29833844	30070717	1639	44	0.280668	0.19078	0.3698	0.0787745	0.0364	0.13675	3.44798e-09	4.28535e-07	2.99974e-06
RA	AS	-0.901006	1937	13	98527336	99402294	2191	309	-0.901006	-1	-0.54743	0.811812	0.29968	1	1.57327e-06	2.58254e-05	0.00136874
RA	AS	-0.960163	2208	17	44865833	45883901	2019	163	-0.960163	-1	-0.60155	0.921913	0.36186	1	2.06805e-06	3.21286e-05	0.0017992

## Sheet: Table S4
Table S4 Genetic correlation analysis conducted by LAVA across multple traits
Note: rg represents genetic correlation strength; Abbreviations: GlycA, Glycoprotein acetyls; RA, Rheumatoid arthritis; AS, Ankylosing spondylitis; PsA, Psoriatic arthritis.
locus	chr	start	stop	n.snps	phen1	phen2	z	r2.phen1_z	r2.phen2_z	pcor	ci.lower	ci.upper	p
954	6	29529756	29833843	2234	GlycA	AS	RA	0.210759	0.142672	0.382816	0.18982	0.58628	0.000241746
1873	13	28587126	30068525	3358	GlycA	PsA	RA	0.0668395	0.929008	-1	-1	-0.46429	0.0424888
954	6	29529756	29833843	2234	GlycA	RA	AS	0.238439	0.142672	0.339894	0.12496	0.56349	0.00304193
962	6	32208902	32454577	1971	GlycA	RA	PsA	0.000357026	0.0361692	0.289984	0.16665	0.41165	3.59352e-06
2133	16	50467034	52041336	3039	PsA	AS	GlycA	0.288852	0.0968597	-0.965361	-1	-0.48074	0.00237746
1941	13	103050418	104378435	3548	PsA	AS	RA	0.490405	0.0289886	-1	-1	-0.46054	0.00166422
1941	13	103050418	104378435	3548	PsA	RA	AS	0.481648	0.0289886	-1	-1	-0.44519	0.000914891
1873	13	28587126	30068525	3358	PsA	RA	GlycA	0.756218	0.0668395	-1	-1	-0.29181	0.00717022
954	6	29529756	29833843	2234	RA	AS	GlycA	0.210759	0.238439	0.198055	0.01288	0.32554	0.0189832
1937	13	98527336	99402294	2191	RA	AS	PsA	0.12392	0.466279	-1	-1	-0.54533	0.00032626

## Sheet: Table S5
Table S5 S-LDSC cell-type heritability enrichment analysis
Abbreviations: GlycA, Glycoprotein acetyls; RA, Rheumatoid arthritis; AS, Ankylosing spondylitis; PsA, Psoriatic arthritis.
Trait	Name	Coefficient	Coefficient_std_error	Coefficient_P_value
AOA	Astrocyte	7.54662e-10	1.18971e-09	0.262935
B-ALL	Astrocyte	-2.08254e-09	1.09553e-09	0.971346
CD	Astrocyte	8.09771e-09	3.83944e-08	0.416479
HT	Astrocyte	3.66876e-09	2.31e-09	0.0561193
IBD	Astrocyte	-5.26453e-09	9.69157e-09	0.706506
MS	Astrocyte	6.9236e-09	5.82208e-09	0.117181
PBC	Astrocyte	-3.76753e-08	1.44513e-08	0.995434
RA	Astrocyte	-3.8984e-09	4.55497e-09	0.803961
AOA	Neuron	-6.96488e-10	1.03498e-09	0.749509
B-ALL	Neuron	-5.63319e-10	1.06916e-09	0.700862
CD	Neuron	-6.10828e-09	3.33963e-08	0.572563
HT	Neuron	-4.36935e-09	1.41032e-09	0.999026
IBD	Neuron	6.36404e-10	8.2708e-09	0.469333
MS	Neuron	-9.90403e-09	5.46349e-09	0.965066
PBC	Neuron	2.41707e-08	1.8863e-08	0.10003
RA	Neuron	-2.6443e-09	4.37039e-09	0.727427
AOA	Oligodendrocyte	-1.51831e-09	1.17191e-09	0.902441
B-ALL	Oligodendrocyte	1.70191e-09	1.6361e-09	0.149118
CD	Oligodendrocyte	-4.04955e-08	3.7324e-08	0.861033
HT	Oligodendrocyte	-1.92731e-09	1.67121e-09	0.875594
IBD	Oligodendrocyte	-4.13671e-09	9.79606e-09	0.663591
MS	Oligodendrocyte	-7.65431e-09	6.1344e-09	0.893942
PBC	Oligodendrocyte	-1.14299e-09	2.41448e-08	0.518879
RA	Oligodendrocyte	-1.70911e-09	4.21426e-09	0.657464
AOA	CD4	4.09533e-08	2.69398e-08	0.0642333
B-ALL	CD4	3.43118e-08	3.05227e-08	0.130476
CD	CD4	1.52853e-06	7.16439e-07	0.0164416
HT	CD4	1.22417e-07	3.94554e-08	0.000958935
IBD	CD4	4.70206e-07	1.85878e-07	0.00570886
MS	CD4	5.80385e-07	1.44174e-07	2.84164e-05
PBC	CD4	9.37147e-07	4.89798e-07	0.0278528
RA	CD4	2.80019e-07	8.45614e-08	0.000464111
AOA	CD8	1.53997e-08	2.71829e-08	0.28552
B-ALL	CD8	1.67059e-08	2.10568e-08	0.21378
CD	CD8	1.73596e-06	7.09194e-07	0.00718673
HT	CD8	7.73692e-08	2.75172e-08	0.0024643
IBD	CD8	5.23935e-07	1.7391e-07	0.00129475
MS	CD8	5.05249e-07	1.40203e-07	0.000156865
PBC	CD8	7.78476e-07	4.66925e-07	0.0477333
RA	CD8	2.20759e-07	7.64612e-08	0.00194341
AOA	CMP	7.3995e-09	1.54029e-08	0.315472
B-ALL	CMP	3.40715e-08	3.23703e-08	0.146273
CD	CMP	7.73051e-07	4.71252e-07	0.0504591
HT	CMP	8.94449e-09	2.06758e-08	0.33265
IBD	CMP	1.32602e-07	9.96817e-08	0.0917181
MS	CMP	3.03264e-08	6.66762e-08	0.324615
PBC	CMP	4.05315e-08	2.64607e-07	0.43913
RA	CMP	-3.57331e-08	4.95023e-08	0.764806
AOA	Erythro	-3.64458e-09	3.16077e-08	0.545899
B-ALL	Erythro	-8.88863e-09	2.57232e-08	0.635159
CD	Erythro	1.77812e-07	8.24888e-07	0.414666
HT	Erythro	-1.00404e-08	2.59332e-08	0.650683
IBD	Erythro	7.10847e-09	1.87932e-07	0.484914
MS	Erythro	-4.15994e-08	1.17867e-07	0.637931
PBC	Erythro	-3.49074e-07	4.24274e-07	0.794677
RA	Erythro	-9.97574e-08	8.09518e-08	0.891083
AOA	GMP	1.66455e-08	1.76081e-08	0.172245
B-ALL	GMP	4.38325e-08	3.11513e-08	0.079701
CD	GMP	9.79009e-07	5.5985e-07	0.0401715
HT	GMP	1.82557e-08	2.3279e-08	0.216457
IBD	GMP	2.25232e-07	1.18337e-07	0.0284999
MS	GMP	7.3287e-08	7.59206e-08	0.167194
PBC	GMP	3.49859e-07	3.00766e-07	0.122369
RA	GMP	-2.91553e-08	5.56453e-08	0.699843
AOA	HSC	1.44664e-08	1.56119e-08	0.17706
B-ALL	HSC	1.5846e-08	2.39362e-08	0.253982
CD	HSC	1.25123e-06	5.9466e-07	0.0176846
HT	HSC	7.3212e-09	2.3919e-08	0.379771
IBD	HSC	2.46848e-07	1.19957e-07	0.0198047
MS	HSC	1.13142e-08	7.50413e-08	0.440077
PBC	HSC	-5.99533e-08	2.46687e-07	0.596011
RA	HSC	-5.45443e-09	5.99555e-08	0.536244
AOA	LMPP	1.82808e-08	2.32064e-08	0.215422
B-ALL	LMPP	3.44736e-08	2.88665e-08	0.116191
CD	LMPP	1.01548e-06	6.47998e-07	0.0585455
HT	LMPP	1.00874e-08	2.79989e-08	0.359319
IBD	LMPP	2.45469e-07	1.41265e-07	0.041136
MS	LMPP	5.83182e-08	9.23224e-08	0.263798
PBC	LMPP	2.00234e-07	3.74833e-07	0.296603
RA	LMPP	-9.43787e-09	7.02166e-08	0.553461
AOA	MEP	1.49556e-08	1.15829e-08	0.0983197
B-ALL	MEP	3.66512e-08	3.36566e-08	0.138083
CD	MEP	6.80709e-07	4.14255e-07	0.0501695
HT	MEP	1.91313e-08	2.4558e-08	0.217982
IBD	MEP	1.53131e-07	9.369e-08	0.0510824
MS	MEP	4.22623e-08	7.15414e-08	0.277348
PBC	MEP	5.66837e-08	2.05637e-07	0.391409
RA	MEP	-2.50381e-08	4.6309e-08	0.705634
AOA	Mono	-6.10024e-09	2.97516e-08	0.581229
B-ALL	Mono	1.71777e-08	2.3428e-08	0.231714
CD	Mono	4.26859e-06	9.71451e-07	5.56321e-06
HT	Mono	1.58913e-08	4.81944e-08	0.370801
IBD	Mono	9.07906e-07	2.25314e-07	2.79469e-05
MS	Mono	3.607e-07	1.59411e-07	0.0118269
PBC	Mono	1.96067e-07	4.63076e-07	0.336002
RA	Mono	9.54817e-08	1.21974e-07	0.216872
AOA	MPP	2.11037e-08	1.63051e-08	0.0977799
B-ALL	MPP	1.92334e-08	2.63594e-08	0.232799
CD	MPP	1.11176e-06	5.30906e-07	0.0181264
HT	MPP	2.20094e-08	2.54325e-08	0.193409
IBD	MPP	2.22261e-07	1.10908e-07	0.0225341
MS	MPP	4.62971e-09	7.2849e-08	0.474663
PBC	MPP	3.96841e-08	2.77251e-07	0.443092
RA	MPP	-6.51718e-09	5.4942e-08	0.547212
AOA	NK	4.67336e-08	3.73501e-08	0.105425
B-ALL	NK	5.25707e-09	1.88555e-08	0.390196
CD	NK	1.88989e-06	7.43606e-07	0.00551864
HT	NK	2.91686e-08	2.89499e-08	0.156834
IBD	NK	5.20346e-07	1.78611e-07	0.00178815
MS	NK	3.7697e-07	1.18801e-07	0.000754049
PBC	NK	6.75394e-07	3.92717e-07	0.0427344
RA	NK	1.50959e-07	7.97785e-08	0.0292303
AOA	ABD.TR.14w.B6	2.801e-09	1.71692e-09	0.0514025
B-ALL	ABD.TR.14w.B6	-1.12562e-09	1.5119e-09	0.771715
CD	ABD.TR.14w.B6	1.48366e-07	5.41103e-08	0.00305407
HT	ABD.TR.14w.B6	4.78573e-09	1.76099e-09	0.00328753
IBD	ABD.TR.14w.B6	2.2749e-08	1.26139e-08	0.0356562
MS	ABD.TR.14w.B6	1.88247e-08	7.13994e-09	0.00418794
PBC	ABD.TR.14w.B6	5.68021e-08	2.34344e-08	0.00767778
RA	ABD.TR.14w.B6	1.72714e-08	5.06593e-09	0.000325622
AOA	B.Fo.LN	6.65651e-10	1.25132e-09	0.297378
B-ALL	B.Fo.LN	-4.76669e-10	1.1083e-09	0.666435
CD	B.Fo.LN	1.07458e-07	5.26084e-08	0.0205461
HT	B.Fo.LN	1.92848e-09	2.55765e-09	0.225424
IBD	B.Fo.LN	3.5034e-08	1.29418e-08	0.00339435
MS	B.Fo.LN	2.06267e-08	7.534e-09	0.0030924
PBC	B.Fo.LN	7.56155e-08	2.94469e-08	0.00511647
RA	B.Fo.LN	9.48732e-09	5.60323e-09	0.0452098
AOA	B.Fo.MLN	1.47293e-09	1.21142e-09	0.112018
B-ALL	B.Fo.MLN	-2.12933e-09	1.25782e-09	0.95476
CD	B.Fo.MLN	1.1951e-07	5.48977e-08	0.014742
HT	B.Fo.MLN	1.87626e-09	2.40499e-09	0.21765
IBD	B.Fo.MLN	2.51458e-08	1.24609e-08	0.0217968
MS	B.Fo.MLN	1.57846e-08	7.66268e-09	0.0197025
PBC	B.Fo.MLN	6.55803e-08	2.75832e-08	0.00871414
RA	B.Fo.MLN	1.10546e-08	5.70963e-09	0.0264259
AOA	B.Fo.PC	9.80597e-11	1.16399e-09	0.466431
B-ALL	B.Fo.PC	7.2928e-10	1.20602e-09	0.27269
CD	B.Fo.PC	1.46265e-07	5.21368e-08	0.00251269
HT	B.Fo.PC	2.63892e-09	2.43156e-09	0.138899
IBD	B.Fo.PC	3.47087e-08	1.13237e-08	0.00108788
MS	B.Fo.PC	8.66384e-09	7.05766e-09	0.109802
PBC	B.Fo.PC	3.39745e-08	2.77967e-08	0.110807
RA	B.Fo.PC	1.16162e-08	5.4054e-09	0.0158168
AOA	B.Fo.Sp	1.19656e-09	1.23209e-09	0.165734
B-ALL	B.Fo.Sp	-1.00208e-09	1.06856e-09	0.825823
CD	B.Fo.Sp	1.1322e-07	5.03683e-08	0.0122928
HT	B.Fo.Sp	2.72538e-09	2.29353e-09	0.117359
IBD	B.Fo.Sp	3.25902e-08	1.23778e-08	0.00423235
MS	B.Fo.Sp	1.69591e-08	7.21495e-09	0.00937297
PBC	B.Fo.Sp	4.52e-08	2.64742e-08	0.0438811
RA	B.Fo.Sp	1.22784e-08	5.33067e-09	0.0106296
AOA	B.FrE.FL	-1.05544e-09	1.31589e-09	0.788745
B-ALL	B.FrE.FL	9.56819e-10	1.61104e-09	0.276285
CD	B.FrE.FL	3.72924e-09	4.85787e-08	0.469404
HT	B.FrE.FL	-2.83052e-09	1.70435e-09	0.951619
IBD	B.FrE.FL	1.56761e-08	1.28619e-08	0.111459
MS	B.FrE.FL	2.98748e-08	8.13932e-09	0.000121074
PBC	B.FrE.FL	2.73271e-08	2.41961e-08	0.129364
RA	B.FrE.FL	1.45969e-08	5.47659e-09	0.00384563
AOA	B.FrF.BM	4.31573e-10	1.18391e-09	0.357731
B-ALL	B.FrF.BM	-1.24426e-09	1.15522e-09	0.859277
CD	B.FrF.BM	1.09704e-07	4.73467e-08	0.010251
HT	B.FrF.BM	4.24799e-09	2.73544e-09	0.0602181
IBD	B.FrF.BM	3.43702e-08	1.21031e-08	0.00225724
MS	B.FrF.BM	2.81635e-08	7.94882e-09	0.000197724
PBC	B.FrF.BM	4.66824e-08	2.86828e-08	0.0518112
RA	B.FrF.BM	1.22941e-08	5.48759e-09	0.0125343
AOA	B.GC.Sp	-2.53087e-10	1.41804e-09	0.570826
B-ALL	B.GC.Sp	2.4921e-10	1.58797e-09	0.437648
CD	B.GC.Sp	-2.29509e-08	4.9235e-08	0.679446
HT	B.GC.Sp	3.18931e-10	2.05524e-09	0.43834
IBD	B.GC.Sp	-1.13452e-09	1.19029e-08	0.537968
MS	B.GC.Sp	9.07838e-09	7.95134e-09	0.126781
PBC	B.GC.Sp	5.77859e-09	2.18105e-08	0.395526
RA	B.GC.Sp	4.12935e-09	4.92194e-09	0.200744
AOA	B.Mem.Sp.v2	2.10658e-09	1.28084e-09	0.0500179
B-ALL	B.Mem.Sp.v2	-1.0095e-09	8.00421e-10	0.896383
CD	B.Mem.Sp.v2	7.24014e-08	4.41077e-08	0.0503503
HT	B.Mem.Sp.v2	2.89977e-10	1.44664e-09	0.420565
IBD	B.Mem.Sp.v2	1.26559e-08	1.11383e-08	0.127926
MS	B.Mem.Sp.v2	1.49805e-08	6.39478e-09	0.00957471
PBC	B.Mem.Sp.v2	3.10183e-08	2.25674e-08	0.0846466
RA	B.Mem.Sp.v2	8.12867e-09	4.9014e-09	0.0486146
AOA	B.MZ.Sp	9.81223e-10	1.52918e-09	0.260545
B-ALL	B.MZ.Sp	1.27345e-09	1.30057e-09	0.163754
CD	B.MZ.Sp	1.30885e-07	5.64114e-08	0.0101654
HT	B.MZ.Sp	2.56338e-09	2.2108e-09	0.12313
IBD	B.MZ.Sp	3.77485e-08	1.30843e-08	0.0019569
MS	B.MZ.Sp	1.89074e-08	8.49197e-09	0.0129902
PBC	B.MZ.Sp	4.75954e-08	2.50912e-08	0.0289209
RA	B.MZ.Sp	1.27318e-08	5.58701e-09	0.011339
AOA	B.T1.Sp	5.62836e-11	1.38763e-09	0.483823
B-ALL	B.T1.Sp	5.93702e-10	1.24191e-09	0.316306
CD	B.T1.Sp	1.00031e-07	5.14268e-08	0.0258807
HT	B.T1.Sp	2.80774e-09	2.24125e-09	0.105147
IBD	B.T1.Sp	2.71936e-08	1.23661e-08	0.0139375
MS	B.T1.Sp	2.66617e-08	8.00917e-09	0.000435957
PBC	B.T1.Sp	5.28542e-08	2.45871e-08	0.0157905
RA	B.T1.Sp	1.48446e-08	5.50433e-09	0.00349939
AOA	B.T2.Sp	1.35536e-09	1.36017e-09	0.159512
B-ALL	B.T2.Sp	-1.56694e-09	1.1385e-09	0.915638
CD	B.T2.Sp	1.21968e-07	5.24541e-08	0.0100295
HT	B.T2.Sp	3.45449e-09	2.44179e-09	0.0785734
IBD	B.T2.Sp	3.61425e-08	1.28689e-08	0.00248856
MS	B.T2.Sp	2.59015e-08	8.48568e-09	0.00113517
PBC	B.T2.Sp	5.49252e-08	2.77342e-08	0.0238284
RA	B.T2.Sp	1.48159e-08	5.10325e-09	0.00184672
AOA	B.T3.Sp	1.08792e-09	1.18396e-09	0.179077
B-ALL	B.T3.Sp	-9.97402e-10	1.21268e-09	0.794598
CD	B.T3.Sp	9.78148e-08	4.93546e-08	0.0237465
HT	B.T3.Sp	2.84923e-09	2.32118e-09	0.109818
IBD	B.T3.Sp	2.90619e-08	1.18082e-08	0.00692436
MS	B.T3.Sp	1.88481e-08	7.76152e-09	0.00758283
PBC	B.T3.Sp	4.94567e-08	2.71986e-08	0.0345047
RA	B.T3.Sp	1.4128e-08	4.88217e-09	0.00190311
AOA	B1a.PC	8.49505e-11	1.21594e-09	0.472151
B-ALL	B1a.PC	-1.65513e-09	1.15863e-09	0.923431
CD	B1a.PC	6.9378e-08	5.15368e-08	0.0891216
HT	B1a.PC	4.40485e-09	2.54384e-09	0.0416747
IBD	B1a.PC	1.70044e-08	1.20585e-08	0.0792464
MS	B1a.PC	1.55441e-08	8.19885e-09	0.0289871
PBC	B1a.PC	4.22724e-08	2.19274e-08	0.0269381
RA	B1a.PC	1.25402e-08	5.28191e-09	0.00879421
AOA	B1a.Sp	1.25358e-09	1.43223e-09	0.190717
B-ALL	B1a.Sp	-2.05767e-09	1.22446e-09	0.953567
CD	B1a.Sp	1.00366e-07	5.53228e-08	0.0348242
HT	B1a.Sp	5.42391e-09	2.63554e-09	0.0197956
IBD	B1a.Sp	2.40397e-08	1.27805e-08	0.0299882
MS	B1a.Sp	3.18352e-08	8.61308e-09	0.000109447
PBC	B1a.Sp	6.92641e-08	2.61777e-08	0.00407342
RA	B1a.Sp	1.47016e-08	5.21846e-09	0.00242201
AOA	B1a.Sp.v2	-5.00794e-11	1.26226e-09	0.515824
B-ALL	B1a.Sp.v2	-7.77392e-10	1.00754e-09	0.779817
CD	B1a.Sp.v2	-3.53336e-08	3.53474e-08	0.84125
HT	B1a.Sp.v2	-1.26968e-09	1.25752e-09	0.843673
IBD	B1a.Sp.v2	-1.20401e-08	9.01887e-09	0.90906
MS	B1a.Sp.v2	1.89044e-09	6.55715e-09	0.386558
PBC	B1a.Sp.v2	2.53173e-08	1.76518e-08	0.0757493
RA	B1a.Sp.v2	3.2476e-09	4.3191e-09	0.22605
AOA	B1b.PC	3.73474e-10	1.26919e-09	0.384279
B-ALL	B1b.PC	-1.65603e-09	1.10766e-09	0.932552
CD	B1b.PC	6.01302e-08	4.86769e-08	0.108361
HT	B1b.PC	5.28984e-09	2.70111e-09	0.025092
IBD	B1b.PC	2.15939e-08	1.17645e-08	0.0332151
MS	B1b.PC	1.88925e-08	8.33009e-09	0.0116652
PBC	B1b.PC	4.04208e-08	2.28336e-08	0.0383441
RA	B1b.PC	1.53034e-08	5.35822e-09	0.00214462
AOA	BA.Bl	6.51956e-10	1.39369e-09	0.319967
B-ALL	BA.Bl	-6.98145e-10	9.84868e-10	0.760798
CD	BA.Bl	3.15739e-08	4.25311e-08	0.228931
HT	BA.Bl	-1.75853e-09	1.52644e-09	0.87535
IBD	BA.Bl	7.77487e-09	9.96604e-09	0.217655
MS	BA.Bl	2.19731e-09	5.91827e-09	0.355216
PBC	BA.Bl	1.66355e-08	1.74498e-08	0.17021
RA	BA.Bl	-3.08251e-09	4.5472e-09	0.75108
AOA	BA.Sp	3.21614e-10	1.39284e-09	0.408694
B-ALL	BA.Sp	-7.82338e-10	1.06303e-09	0.769119
CD	BA.Sp	1.99076e-09	4.41054e-08	0.481999
HT	BA.Sp	-1.88338e-09	1.44087e-09	0.904413
IBD	BA.Sp	-4.53546e-11	1.01002e-08	0.501791
MS	BA.Sp	2.10172e-09	6.46813e-09	0.372615
PBC	BA.Sp	1.94319e-08	1.8556e-08	0.147504
RA	BA.Sp	1.37953e-09	4.16527e-09	0.370247
AOA	BEC.MLN	-1.96488e-10	1.22723e-09	0.563602
B-ALL	BEC.MLN	1.17375e-09	1.21545e-09	0.167101
CD	BEC.MLN	-3.41186e-08	3.98262e-08	0.804192
HT	BEC.MLN	-2.06897e-09	1.55562e-09	0.908241
IBD	BEC.MLN	5.68553e-09	1.07998e-08	0.299289
MS	BEC.MLN	3.96149e-09	6.90511e-09	0.283084
PBC	BEC.MLN	-2.16976e-08	1.61313e-08	0.910697
RA	BEC.MLN	-6.08802e-09	3.80369e-09	0.945262
AOA	BEC.SLN	-8.78191e-10	1.21803e-09	0.764544
B-ALL	BEC.SLN	1.35976e-09	1.11855e-09	0.11206
CD	BEC.SLN	-2.9396e-08	3.82605e-08	0.778849
HT	BEC.SLN	-1.45099e-09	1.58147e-09	0.820559
IBD	BEC.SLN	4.65755e-09	1.01911e-08	0.323828
MS	BEC.SLN	1.92106e-09	6.46901e-09	0.383247
PBC	BEC.SLN	-3.02725e-08	1.6423e-08	0.967357
RA	BEC.SLN	-6.43229e-09	3.85651e-09	0.952332
AOA	BEC.SLN.OT	-1.2696e-09	1.17734e-09	0.859563
B-ALL	BEC.SLN.OT	1.30817e-09	1.15615e-09	0.128926
CD	BEC.SLN.OT	-4.26659e-08	3.8094e-08	0.868647
HT	BEC.SLN.OT	-1.08051e-09	1.49576e-09	0.764971
IBD	BEC.SLN.OT	4.47142e-09	1.04912e-08	0.334978
MS	BEC.SLN.OT	3.73806e-09	6.30085e-09	0.276503
PBC	BEC.SLN.OT	-1.48305e-08	1.77513e-08	0.798271
RA	BEC.SLN.OT	-4.77401e-09	3.69242e-09	0.901981
AOA	CD19Control	1.46808e-09	1.184e-09	0.107499
B-ALL	CD19Control	-1.72744e-09	1.11799e-09	0.938843
CD	CD19Control	1.03472e-07	5.23957e-08	0.024144
HT	CD19Control	3.14231e-09	2.315e-09	0.0873319
IBD	CD19Control	2.72598e-08	1.19916e-08	0.0115058
MS	CD19Control	1.91544e-08	7.868e-09	0.00745698
PBC	CD19Control	3.52121e-08	2.6092e-08	0.088582
RA	CD19Control	9.6234e-09	4.87771e-09	0.0242517
AOA	CD4.1h.LN	-8.38681e-10	1.56689e-09	0.703762
B-ALL	CD4.1h.LN	-1.50893e-09	1.00885e-09	0.932633
CD	CD4.1h.LN	3.78302e-08	4.30552e-08	0.189797
HT	CD4.1h.LN	4.09154e-10	2.19715e-09	0.426136
IBD	CD4.1h.LN	8.45713e-09	1.09529e-08	0.220017
MS	CD4.1h.LN	7.35898e-09	7.34059e-09	0.15805
PBC	CD4.1h.LN	1.27126e-09	1.79993e-08	0.471847
RA	CD4.1h.LN	7.53127e-10	4.79838e-09	0.43764
AOA	CD4.24h.LN	-1.10868e-09	1.57136e-09	0.759769
B-ALL	CD4.24h.LN	3.21316e-09	2.10354e-09	0.0633179
CD	CD4.24h.LN	1.09245e-07	5.29998e-08	0.0196403
HT	CD4.24h.LN	5.58016e-10	2.48393e-09	0.411126
IBD	CD4.24h.LN	2.40126e-08	1.36342e-08	0.0391027
MS	CD4.24h.LN	6.44404e-09	8.46546e-09	0.223264
PBC	CD4.24h.LN	5.43861e-09	2.421e-08	0.411129
RA	CD4.24h.LN	-5.52676e-10	6.91518e-09	0.53185
AOA	CD4.48h.LN	1.68944e-09	1.65199e-09	0.153232
B-ALL	CD4.48h.LN	1.99429e-09	2.31446e-09	0.194435
CD	CD4.48h.LN	-9.95828e-11	5.20825e-08	0.500763
HT	CD4.48h.LN	6.77878e-09	4.23021e-09	0.0545259
IBD	CD4.48h.LN	-5.28688e-10	1.35323e-08	0.515582
MS	CD4.48h.LN	1.69864e-08	8.91484e-09	0.0283637
PBC	CD4.48h.LN	5.01207e-09	2.61818e-08	0.424093
RA	CD4.48h.LN	1.44907e-08	7.54237e-09	0.0273509
AOA	CD4.5h.LN	1.54657e-11	1.72845e-09	0.49643
B-ALL	CD4.5h.LN	-6.37593e-10	1.30363e-09	0.687611
CD	CD4.5h.LN	1.55499e-07	5.77533e-08	0.00354625
HT	CD4.5h.LN	-9.95071e-11	2.22564e-09	0.517831
IBD	CD4.5h.LN	4.1048e-08	1.3978e-08	0.00165909
MS	CD4.5h.LN	2.5289e-08	8.49195e-09	0.00145073
PBC	CD4.5h.LN	5.25703e-08	2.18529e-08	0.00807192
RA	CD4.5h.LN	7.76638e-09	7.57954e-09	0.152764
AOA	CD4.96h.LN	4.31803e-10	1.54733e-09	0.390098
B-ALL	CD4.96h.LN	3.40081e-10	1.06933e-09	0.375231
CD	CD4.96h.LN	7.92355e-08	4.62993e-08	0.0435059
HT	CD4.96h.LN	4.06968e-09	2.11913e-09	0.0274007
IBD	CD4.96h.LN	2.3126e-08	1.24642e-08	0.0317697
MS	CD4.96h.LN	9.94364e-09	8.06282e-09	0.108738
PBC	CD4.96h.LN	8.05061e-09	2.12175e-08	0.352183
RA	CD4.96h.LN	5.09942e-09	4.82174e-09	0.145121
AOA	CD4.CTR.LN	8.90249e-10	1.43963e-09	0.26816
B-ALL	CD4.CTR.LN	9.08027e-10	1.11006e-09	0.206679
CD	CD4.CTR.LN	9.49273e-08	4.56359e-08	0.0187581
HT	CD4.CTR.LN	4.59666e-09	2.49463e-09	0.0326922
IBD	CD4.CTR.LN	3.03654e-08	1.24516e-08	0.0073708
MS	CD4.CTR.LN	2.27299e-08	7.72335e-09	0.0016252
PBC	CD4.CTR.LN	2.45762e-08	2.05434e-08	0.115789
RA	CD4.CTR.LN	1.82647e-09	1.15239e-09	0.05649
AOA	CD8.1h.LN	-1.30985e-09	1.52355e-09	0.805034
B-ALL	CD8.1h.LN	-1.39365e-10	1.10228e-09	0.550306
CD	CD8.1h.LN	7.69009e-08	5.15844e-08	0.0680097
HT	CD8.1h.LN	3.95632e-09	3.3287e-09	0.117308
IBD	CD8.1h.LN	1.16746e-08	1.30486e-08	0.185473
MS	CD8.1h.LN	1.39697e-08	7.80629e-09	0.0367635
PBC	CD8.1h.LN	-3.61558e-09	2.22031e-08	0.564678
RA	CD8.1h.LN	8.17316e-09	5.85023e-09	0.0811967
AOA	CD8.24h.LN	-1.08308e-09	1.51913e-09	0.762065
B-ALL	CD8.24h.LN	2.56787e-09	2.01758e-09	0.101554
CD	CD8.24h.LN	8.55046e-08	5.27399e-08	0.0524819
HT	CD8.24h.LN	8.7897e-10	2.45031e-09	0.359903
IBD	CD8.24h.LN	1.61234e-08	1.35553e-08	0.11713
MS	CD8.24h.LN	7.4813e-09	8.29969e-09	0.183689
PBC	CD8.24h.LN	-2.18369e-09	2.26663e-08	0.538375
RA	CD8.24h.LN	1.51089e-09	7.56717e-09	0.420872
AOA	CD8.48h.LN	-7.28363e-10	1.56697e-09	0.678971
B-ALL	CD8.48h.LN	9.13634e-10	2.19394e-09	0.338546
CD	CD8.48h.LN	-4.85775e-08	4.6066e-08	0.854178
HT	CD8.48h.LN	7.36937e-09	4.349e-09	0.0450852
IBD	CD8.48h.LN	-1.215e-08	1.27604e-08	0.829493
MS	CD8.48h.LN	1.48137e-08	8.30873e-09	0.0373002
PBC	CD8.48h.LN	-8.05921e-09	2.35848e-08	0.633716
RA	CD8.48h.LN	1.17065e-08	7.03175e-09	0.0479758
AOA	CD8.5h.LN	4.09398e-10	1.64705e-09	0.401849
B-ALL	CD8.5h.LN	9.35354e-10	1.34929e-09	0.244086
CD	CD8.5h.LN	1.39141e-07	5.59369e-08	0.00643302
HT	CD8.5h.LN	1.36961e-09	2.39197e-09	0.283463
IBD	CD8.5h.LN	3.35455e-08	1.34457e-08	0.00629984
MS	CD8.5h.LN	2.05549e-08	9.66365e-09	0.0167086
PBC	CD8.5h.LN	2.60168e-08	2.75841e-08	0.172794
RA	CD8.5h.LN	5.88124e-09	7.21259e-09	0.207418
AOA	CD8.96h.LN	2.91603e-11	1.91502e-09	0.493925
B-ALL	CD8.96h.LN	9.29614e-10	1.07167e-09	0.192849
CD	CD8.96h.LN	6.7362e-08	4.5462e-08	0.0692071
HT	CD8.96h.LN	3.60328e-09	2.20334e-09	0.0509856
IBD	CD8.96h.LN	4.92063e-09	1.16291e-08	0.3361
MS	CD8.96h.LN	1.07496e-08	7.72972e-09	0.082161
PBC	CD8.96h.LN	1.07571e-08	2.03227e-08	0.298293
RA	CD8.96h.LN	5.56357e-09	5.51055e-09	0.156338
AOA	CD8.CTR.LN	-1.12023e-09	1.51931e-09	0.76954
B-ALL	CD8.CTR.LN	6.18811e-10	1.09541e-09	0.286066
CD	CD8.CTR.LN	4.69956e-08	3.88189e-08	0.113017
HT	CD8.CTR.LN	2.5286e-09	2.51183e-09	0.157046
IBD	CD8.CTR.LN	1.04226e-08	1.10841e-08	0.173528
MS	CD8.CTR.LN	1.61081e-08	8.57753e-09	0.0301943
PBC	CD8.CTR.LN	-2.10362e-09	2.17178e-08	0.538582
RA	CD8.CTR.LN	2.57636e-10	4.48954e-09	0.477119
AOA	DC.103+11b-.Lu	-1.19173e-09	1.31354e-09	0.817866
B-ALL	DC.103+11b-.Lu	-2.43569e-10	1.24237e-09	0.577715
CD	DC.103+11b-.Lu	1.0701e-07	4.66603e-08	0.0109131
HT	DC.103+11b-.Lu	3.3096e-09	1.99895e-09	0.0488939
IBD	DC.103+11b-.Lu	1.11535e-08	1.08752e-08	0.152543
MS	DC.103+11b-.Lu	2.08529e-09	6.39101e-09	0.372105
PBC	DC.103+11b-.Lu	-8.4436e-09	2.34084e-08	0.640841
RA	DC.103+11b-.Lu	2.35061e-09	4.43832e-09	0.298189
AOA	DC.103+11b-.Lv	-3.11959e-09	1.2258e-09	0.994535
B-ALL	DC.103+11b-.Lv	-6.00073e-10	1.15994e-09	0.697537
CD	DC.103+11b-.Lv	4.41869e-08	3.93007e-08	0.130437
HT	DC.103+11b-.Lv	1.61419e-09	1.93945e-09	0.202621
IBD	DC.103+11b-.Lv	1.12562e-08	1.01667e-08	0.13411
MS	DC.103+11b-.Lv	6.29358e-09	6.04616e-09	0.148956
PBC	DC.103+11b-.Lv	1.58573e-08	1.88423e-08	0.200012
RA	DC.103+11b-.Lv	2.57807e-09	4.50557e-09	0.283595
AOA	DC.103-11b+24+.Lu	1.67691e-09	1.93603e-09	0.193202
B-ALL	DC.103-11b+24+.Lu	-3.6173e-10	1.24586e-09	0.614225
CD	DC.103-11b+24+.Lu	1.99205e-07	4.86686e-08	2.12842e-05
HT	DC.103-11b+24+.Lu	1.25898e-09	1.93371e-09	0.257501
IBD	DC.103-11b+24+.Lu	3.25405e-08	1.11654e-08	0.0017819
MS	DC.103-11b+24+.Lu	1.36253e-08	7.02886e-09	0.026282
PBC	DC.103-11b+24+.Lu	1.59689e-09	2.10278e-08	0.469733
RA	DC.103-11b+24+.Lu	8.8496e-09	4.47247e-09	0.0239259
AOA	DC.103-11b+F4_80lo.Kd	-5.30161e-10	1.45601e-09	0.642116
B-ALL	DC.103-11b+F4_80lo.Kd	-4.08311e-10	1.29598e-09	0.623641
CD	DC.103-11b+F4_80lo.Kd	1.25368e-07	4.75013e-08	0.00415441
HT	DC.103-11b+F4_80lo.Kd	1.44895e-09	1.96454e-09	0.230393
IBD	DC.103-11b+F4_80lo.Kd	1.83381e-08	1.0881e-08	0.0459626
MS	DC.103-11b+F4_80lo.Kd	1.51486e-08	7.26969e-09	0.0185888
PBC	DC.103-11b+F4_80lo.Kd	-6.81223e-09	1.85444e-08	0.64332
RA	DC.103-11b+F4_80lo.Kd	7.02789e-09	4.68236e-09	0.0666869
AOA	DC.11b-.AT.v2	3.07485e-10	1.19586e-09	0.398541
B-ALL	DC.11b-.AT.v2	-8.94131e-10	1.12371e-09	0.786895
CD	DC.11b-.AT.v2	5.95945e-08	4.36157e-08	0.085914
HT	DC.11b-.AT.v2	1.11575e-09	2.04106e-09	0.292309
IBD	DC.11b-.AT.v2	4.1127e-09	9.95147e-09	0.339702
MS	DC.11b-.AT.v2	5.59093e-09	7.75689e-09	0.235525
PBC	DC.11b-.AT.v2	-2.52673e-09	2.19377e-08	0.545848
RA	DC.11b-.AT.v2	-2.04322e-09	4.18009e-09	0.687507
AOA	DC.11b+.AT.v2	-8.36552e-10	1.31161e-09	0.7382
B-ALL	DC.11b+.AT.v2	-1.0713e-10	1.02239e-09	0.541726
CD	DC.11b+.AT.v2	6.77403e-08	4.55303e-08	0.0684007
HT	DC.11b+.AT.v2	-1.64583e-09	1.79007e-09	0.821062
IBD	DC.11b+.AT.v2	1.12983e-08	1.06296e-08	0.143912
MS	DC.11b+.AT.v2	-1.75264e-09	6.18425e-09	0.611567
PBC	DC.11b+.AT.v2	-1.27009e-08	1.91474e-08	0.746437
RA	DC.11b+.AT.v2	-5.16456e-09	4.07642e-09	0.897411
AOA	DC.4+.MLN	-1.34455e-09	1.19092e-09	0.870552
B-ALL	DC.4+.MLN	8.3196e-10	1.25056e-09	0.252938
CD	DC.4+.MLN	1.15441e-07	4.75032e-08	0.0075459
HT	DC.4+.MLN	3.93279e-11	1.37374e-09	0.488581
IBD	DC.4+.MLN	2.94247e-08	1.1788e-08	0.00627756
MS	DC.4+.MLN	9.18136e-09	6.0326e-09	0.06401
PBC	DC.4+.MLN	4.8283e-09	1.84131e-08	0.396576
RA	DC.4+.MLN	8.56806e-09	4.30476e-09	0.023275
AOA	DC.4+.SLN	-5.32692e-10	1.3783e-09	0.650431
B-ALL	DC.4+.SLN	9.99649e-10	1.26265e-09	0.214266
CD	DC.4+.SLN	5.1334e-08	4.86488e-08	0.145667
HT	DC.4+.SLN	-2.71289e-09	1.45518e-09	0.96886
IBD	DC.4+.SLN	9.13118e-09	1.09682e-08	0.20256
MS	DC.4+.SLN	1.84756e-08	7.02445e-09	0.00426699
PBC	DC.4+.SLN	9.47176e-09	1.99338e-08	0.317336
RA	DC.4+.SLN	9.31755e-09	4.29506e-09	0.0150275
AOA	DC.4+.Sp.ST	-8.37378e-10	1.25013e-09	0.748518
B-ALL	DC.4+.Sp.ST	-3.55855e-10	1.33949e-09	0.604752
CD	DC.4+.Sp.ST	1.21754e-07	4.53587e-08	0.00363458
HT	DC.4+.Sp.ST	8.46112e-10	1.78295e-09	0.317551
IBD	DC.4+.Sp.ST	3.16345e-08	1.10861e-08	0.00216177
MS	DC.4+.Sp.ST	1.3434e-08	6.45996e-09	0.0187821
PBC	DC.4+.Sp.ST	3.76137e-08	1.95857e-08	0.0273993
RA	DC.4+.Sp.ST	1.12035e-08	4.52812e-09	0.0066765
AOA	DC.8-.Th	-3.4896e-09	1.16562e-09	0.998622
B-ALL	DC.8-.Th	-2.86515e-10	1.29572e-09	0.587502
CD	DC.8-.Th	1.2299e-07	4.30961e-08	0.00215953
HT	DC.8-.Th	1.46673e-09	1.62418e-09	0.183247
IBD	DC.8-.Th	2.81677e-08	1.12781e-08	0.00625277
MS	DC.8-.Th	7.28032e-09	7.36609e-09	0.161489
PBC	DC.8-.Th	-5.86383e-09	2.2573e-08	0.60248
RA	DC.8-.Th	9.80628e-09	4.94836e-09	0.0237551
AOA	DC.8+.MLN	-3.38698e-09	1.2367e-09	0.996916
B-ALL	DC.8+.MLN	-1.51073e-09	1.26819e-09	0.883222
CD	DC.8+.MLN	8.95678e-08	4.45594e-08	0.0222116
HT	DC.8+.MLN	1.17473e-09	2.05824e-09	0.284086
IBD	DC.8+.MLN	1.44997e-08	1.0972e-08	0.0931635
MS	DC.8+.MLN	7.19519e-09	7.2092e-09	0.159126
PBC	DC.8+.MLN	-1.94084e-08	2.27158e-08	0.803559
RA	DC.8+.MLN	2.8962e-09	4.99658e-09	0.28108
AOA	DC.8+.SLN	-2.02286e-09	1.29416e-09	0.940981
B-ALL	DC.8+.SLN	-1.48382e-09	1.26496e-09	0.879606
CD	DC.8+.SLN	1.28339e-07	4.52359e-08	0.00227631
HT	DC.8+.SLN	2.08168e-09	1.97588e-09	0.146046
IBD	DC.8+.SLN	2.404e-08	1.07919e-08	0.0129539
MS	DC.8+.SLN	7.29191e-09	7.32395e-09	0.159716
PBC	DC.8+.SLN	-6.67291e-09	1.96874e-08	0.632674
RA	DC.8+.SLN	6.55903e-09	4.6272e-09	0.0781694
AOA	DC.8+.Sp.ST	-2.87002e-09	1.30787e-09	0.985898
B-ALL	DC.8+.Sp.ST	-1.00571e-09	1.18747e-09	0.801485
CD	DC.8+.Sp.ST	9.36255e-08	4.58903e-08	0.0206651
HT	DC.8+.Sp.ST	2.24636e-09	2.0155e-09	0.132523
IBD	DC.8+.Sp.ST	1.7063e-08	1.03553e-08	0.0497007
MS	DC.8+.Sp.ST	8.0985e-09	6.66907e-09	0.112309
PBC	DC.8+.Sp.ST	-9.08608e-09	2.13818e-08	0.664561
RA	DC.8+.Sp.ST	5.33801e-09	4.80152e-09	0.133126
AOA	DC.8+.Th	-3.95428e-09	1.12957e-09	0.999768
B-ALL	DC.8+.Th	-9.5445e-10	1.26044e-09	0.775545
CD	DC.8+.Th	1.0182e-07	4.22967e-08	0.00803578
HT	DC.8+.Th	1.05906e-09	1.64396e-09	0.259717
IBD	DC.8+.Th	1.61983e-08	1.05761e-08	0.0628112
MS	DC.8+.Th	3.76622e-09	7.14414e-09	0.299035
PBC	DC.8+.Th	-2.7769e-09	2.09904e-08	0.552624
RA	DC.8+.Th	2.56074e-09	4.92153e-09	0.301422
AOA	DC.8-4-11b-.MLN	-7.53914e-11	1.22468e-09	0.524543
B-ALL	DC.8-4-11b-.MLN	-1.11847e-09	1.31528e-09	0.802441
CD	DC.8-4-11b-.MLN	7.41917e-08	4.89569e-08	0.0648291
HT	DC.8-4-11b-.MLN	2.10844e-09	1.90845e-09	0.134625
IBD	DC.8-4-11b-.MLN	1.34821e-08	1.27197e-08	0.144587
MS	DC.8-4-11b-.MLN	1.33863e-08	6.5495e-09	0.0204835
PBC	DC.8-4-11b-.MLN	1.91117e-08	2.18028e-08	0.190359
RA	DC.8-4-11b-.MLN	1.00598e-08	4.46116e-09	0.0120678
AOA	DC.8-4-11b-.SLN	-8.23675e-10	1.26799e-09	0.742022
B-ALL	DC.8-4-11b-.SLN	2.04116e-10	1.40279e-09	0.442156
CD	DC.8-4-11b-.SLN	1.85451e-07	5.31471e-08	0.000242062
HT	DC.8-4-11b-.SLN	1.16881e-09	1.62117e-09	0.235466
IBD	DC.8-4-11b-.SLN	3.50631e-08	1.29085e-08	0.00330094
MS	DC.8-4-11b-.SLN	1.992e-08	7.30666e-09	0.00320267
PBC	DC.8-4-11b-.SLN	4.05416e-08	2.55307e-08	0.0561483
RA	DC.8-4-11b-.SLN	1.34824e-08	4.67761e-09	0.00197372
AOA	DC.8-4-11b-.Sp	-2.73704e-09	1.30442e-09	0.98206
B-ALL	DC.8-4-11b-.Sp	2.60313e-10	1.27002e-09	0.418799
CD	DC.8-4-11b-.Sp	8.45738e-08	4.20158e-08	0.0220623
HT	DC.8-4-11b-.Sp	1.89678e-09	1.90832e-09	0.160124
IBD	DC.8-4-11b-.Sp	1.97203e-08	1.03459e-08	0.0283184
MS	DC.8-4-11b-.Sp	1.03222e-08	6.71405e-09	0.0620975
PBC	DC.8-4-11b-.Sp	1.369e-08	2.06943e-08	0.254135
RA	DC.8-4-11b-.Sp	3.62564e-09	4.51245e-09	0.21085
AOA	DC.8-4-11b+.MLN	5.0065e-10	1.23479e-09	0.342572
B-ALL	DC.8-4-11b+.MLN	-3.61561e-10	1.45409e-09	0.598185
CD	DC.8-4-11b+.MLN	1.2527e-07	5.02681e-08	0.00635061
HT	DC.8-4-11b+.MLN	3.26455e-09	1.99985e-09	0.0512979
IBD	DC.8-4-11b+.MLN	2.99569e-08	1.25233e-08	0.00837621
MS	DC.8-4-11b+.MLN	1.92474e-08	6.78345e-09	0.0022741
PBC	DC.8-4-11b+.MLN	3.49711e-08	2.25929e-08	0.0608255
RA	DC.8-4-11b+.MLN	1.26426e-08	4.62726e-09	0.00314565
AOA	DC.8-4-11b+.SLN	8.84431e-10	1.24113e-09	0.238046
B-ALL	DC.8-4-11b+.SLN	3.98634e-10	1.42418e-09	0.389776
CD	DC.8-4-11b+.SLN	1.02804e-07	4.69802e-08	0.0143262
HT	DC.8-4-11b+.SLN	-2.43309e-10	1.57179e-09	0.561509
IBD	DC.8-4-11b+.SLN	2.11904e-08	1.16617e-08	0.0346017
MS	DC.8-4-11b+.SLN	1.78133e-08	7.00247e-09	0.00548172
PBC	DC.8-4-11b+.SLN	2.29727e-08	2.22615e-08	0.151048
RA	DC.8-4-11b+.SLN	1.42082e-08	4.66512e-09	0.00116101
AOA	DC.8-4-11b+.Sp	-1.01149e-09	1.26219e-09	0.788543
B-ALL	DC.8-4-11b+.Sp	5.72114e-10	1.17098e-09	0.31257
CD	DC.8-4-11b+.Sp	2.8164e-08	4.2718e-08	0.254851
HT	DC.8-4-11b+.Sp	2.05648e-09	2.6815e-09	0.221566
IBD	DC.8-4-11b+.Sp	7.45367e-09	1.06948e-08	0.242918
MS	DC.8-4-11b+.Sp	1.13839e-08	6.4565e-09	0.0389366
PBC	DC.8-4-11b+.Sp	2.38385e-09	1.86837e-08	0.449237
RA	DC.8-4-11b+.Sp	6.49433e-09	4.5709e-09	0.0776878
AOA	DC.IIhilang+103+11blo.SLN	-1.43831e-09	1.19817e-09	0.885012
B-ALL	DC.IIhilang+103+11blo.SLN	1.01941e-10	1.32116e-09	0.469248
CD	DC.IIhilang+103+11blo.SLN	1.48078e-07	5.23336e-08	0.00233104
HT	DC.IIhilang+103+11blo.SLN	1.19258e-09	1.81516e-09	0.255587
IBD	DC.IIhilang+103+11blo.SLN	2.67724e-08	1.32881e-08	0.0219645
MS	DC.IIhilang+103+11blo.SLN	1.32852e-08	7.2085e-09	0.0326657
PBC	DC.IIhilang+103+11blo.SLN	2.19131e-08	2.39062e-08	0.179669
RA	DC.IIhilang+103+11blo.SLN	1.28715e-08	4.79017e-09	0.00360412
AOA	DC.IIhilang+103-11b+.SLN	5.29115e-10	1.20175e-09	0.329865
B-ALL	DC.IIhilang+103-11b+.SLN	6.76226e-10	1.15613e-09	0.279306
CD	DC.IIhilang+103-11b+.SLN	8.93077e-08	4.00771e-08	0.0129271
HT	DC.IIhilang+103-11b+.SLN	2.30792e-09	2.6389e-09	0.190902
IBD	DC.IIhilang+103-11b+.SLN	2.02873e-08	1.0132e-08	0.0226266
MS	DC.IIhilang+103-11b+.SLN	8.27419e-09	6.36718e-09	0.0968854
PBC	DC.IIhilang+103-11b+.SLN	2.10767e-08	2.26743e-08	0.176304
RA	DC.IIhilang+103-11b+.SLN	1.26673e-08	4.1209e-09	0.00105637
AOA	DC.IIhilang-103-11b+.SLN	6.32157e-10	1.29391e-09	0.312575
B-ALL	DC.IIhilang-103-11b+.SLN	-3.66236e-10	1.35379e-09	0.606622
CD	DC.IIhilang-103-11b+.SLN	1.03697e-07	4.42142e-08	0.00950534
HT	DC.IIhilang-103-11b+.SLN	1.70414e-09	2.15469e-09	0.214502
IBD	DC.IIhilang-103-11b+.SLN	2.26741e-08	1.13561e-08	0.0229316
MS	DC.IIhilang-103-11b+.SLN	1.64797e-08	6.96599e-09	0.00899711
PBC	DC.IIhilang-103-11b+.SLN	2.60744e-08	2.14542e-08	0.112116
RA	DC.IIhilang-103-11b+.SLN	1.2127e-08	4.7634e-09	0.00545021
AOA	DC.IIhilang-103-11blo.SLN	4.66636e-10	1.17605e-09	0.345764
B-ALL	DC.IIhilang-103-11blo.SLN	1.30821e-10	1.30645e-09	0.460119
CD	DC.IIhilang-103-11blo.SLN	7.87896e-08	4.34603e-08	0.0349228
HT	DC.IIhilang-103-11blo.SLN	6.40637e-10	1.5255e-09	0.33726
IBD	DC.IIhilang-103-11blo.SLN	1.40355e-08	1.11866e-08	0.104799
MS	DC.IIhilang-103-11blo.SLN	9.66461e-09	6.97202e-09	0.082843
PBC	DC.IIhilang-103-11blo.SLN	2.41601e-08	2.5314e-08	0.169937
RA	DC.IIhilang-103-11blo.SLN	1.64271e-08	4.66564e-09	0.000215072
AOA	DC.LC.Sk	2.3614e-09	1.56175e-09	0.0652643
B-ALL	DC.LC.Sk	6.96557e-10	1.1293e-09	0.268682
CD	DC.LC.Sk	5.23533e-08	4.23113e-08	0.107981
HT	DC.LC.Sk	1.08714e-09	2.14859e-09	0.306436
IBD	DC.LC.Sk	1.2058e-08	1.11247e-08	0.139205
MS	DC.LC.Sk	5.85664e-09	6.94749e-09	0.199618
PBC	DC.LC.Sk	3.63437e-08	2.70728e-08	0.0897262
RA	DC.LC.Sk	6.99842e-09	4.88763e-09	0.0760916
AOA	DC.pDC.8-.Sp	-3.13863e-09	1.28845e-09	0.992574
B-ALL	DC.pDC.8-.Sp	-3.83365e-10	1.23091e-09	0.62227
CD	DC.pDC.8-.Sp	-1.19286e-08	4.49825e-08	0.604566
HT	DC.pDC.8-.Sp	-1.86409e-09	1.70101e-09	0.863433
IBD	DC.pDC.8-.Sp	-8.10327e-09	1.11151e-08	0.76701
MS	DC.pDC.8-.Sp	6.64728e-09	7.1003e-09	0.174586
PBC	DC.pDC.8-.Sp	9.55165e-09	1.95646e-08	0.312701
RA	DC.pDC.8-.Sp	1.5294e-09	5.25649e-09	0.385543
AOA	DC.pDC.8+.MLN	-2.21352e-09	1.27442e-09	0.958796
B-ALL	DC.pDC.8+.MLN	-4.94508e-10	1.29229e-09	0.649014
CD	DC.pDC.8+.MLN	1.09215e-09	4.50749e-08	0.490335
HT	DC.pDC.8+.MLN	-1.87644e-09	1.7012e-09	0.864989
IBD	DC.pDC.8+.MLN	-4.44055e-09	1.10816e-08	0.655684
MS	DC.pDC.8+.MLN	1.27081e-08	7.45938e-09	0.0442241
PBC	DC.pDC.8+.MLN	4.48659e-09	2.01118e-08	0.411736
RA	DC.pDC.8+.MLN	1.00024e-09	5.29278e-09	0.425054
AOA	DC.pDC.8+.SLN	-2.36793e-09	1.28178e-09	0.967654
B-ALL	DC.pDC.8+.SLN	-2.77056e-10	1.31637e-09	0.583349
CD	DC.pDC.8+.SLN	-1.09958e-08	4.6408e-08	0.593648
HT	DC.pDC.8+.SLN	-2.15873e-09	1.704e-09	0.897397
IBD	DC.pDC.8+.SLN	-6.16835e-09	1.15132e-08	0.703939
MS	DC.pDC.8+.SLN	1.61932e-08	7.46212e-09	0.0150015
PBC	DC.pDC.8+.SLN	1.89972e-08	2.25556e-08	0.199828
RA	DC.pDC.8+.SLN	7.22093e-10	5.24423e-09	0.445242
AOA	DC.pDC.8+.Sp	-2.56432e-09	1.32416e-09	0.973601
B-ALL	DC.pDC.8+.Sp	-3.77185e-10	1.22792e-09	0.620644
CD	DC.pDC.8+.Sp	-3.68862e-09	4.53522e-08	0.532411
HT	DC.pDC.8+.Sp	-9.2353e-10	1.72596e-09	0.703703
IBD	DC.pDC.8+.Sp	-4.93789e-09	1.11961e-08	0.670407
MS	DC.pDC.8+.Sp	1.12889e-08	6.82201e-09	0.0489846
PBC	DC.pDC.8+.Sp	-9.09329e-10	1.85973e-08	0.519499
RA	DC.pDC.8+.Sp	5.2267e-09	5.2144e-09	0.158085
AOA	DN.SLN.CFA.d6.v2	1.07208e-09	1.06985e-09	0.158151
B-ALL	DN.SLN.CFA.d6.v2	1.59692e-09	1.02043e-09	0.0587985
CD	DN.SLN.CFA.d6.v2	-4.70435e-08	3.36271e-08	0.91909
HT	DN.SLN.CFA.d6.v2	-2.80777e-10	1.36989e-09	0.581199
IBD	DN.SLN.CFA.d6.v2	-4.1815e-09	8.28505e-09	0.693117
MS	DN.SLN.CFA.d6.v2	-3.63373e-09	5.1591e-09	0.759388
PBC	DN.SLN.CFA.d6.v2	-1.47873e-08	1.49621e-08	0.8385
RA	DN.SLN.CFA.d6.v2	-5.35683e-09	3.25883e-09	0.94989
AOA	DN.SLN.v2	4.85923e-10	1.07144e-09	0.325085
B-ALL	DN.SLN.v2	9.08406e-10	1.06023e-09	0.195778
CD	DN.SLN.v2	-6.31395e-08	3.10526e-08	0.978989
HT	DN.SLN.v2	-1.13505e-09	1.41315e-09	0.789072
IBD	DN.SLN.v2	-7.09051e-09	8.20254e-09	0.806324
MS	DN.SLN.v2	-6.73533e-09	5.14184e-09	0.904886
PBC	DN.SLN.v2	-1.51119e-08	1.49241e-08	0.844371
RA	DN.SLN.v2	-6.17402e-09	3.22859e-09	0.972081
AOA	EO.AT.v2	8.68276e-10	1.3183e-09	0.255065
B-ALL	EO.AT.v2	9.6017e-10	1.07837e-09	0.186629
CD	EO.AT.v2	-3.49371e-08	3.62431e-08	0.832468
HT	EO.AT.v2	-2.81023e-09	1.42169e-09	0.975962
IBD	EO.AT.v2	-3.49984e-09	9.88165e-09	0.638396
MS	EO.AT.v2	-1.0442e-08	6.28135e-09	0.951782
PBC	EO.AT.v2	3.48895e-08	2.08527e-08	0.0471498
RA	EO.AT.v2	-7.84031e-09	3.85794e-09	0.978936
AOA	Eo.BL.v2	1.71911e-09	1.09971e-09	0.058997
B-ALL	Eo.BL.v2	2.90235e-10	8.90511e-10	0.372242
CD	Eo.BL.v2	-5.06267e-08	3.19995e-08	0.943188
HT	Eo.BL.v2	-2.18768e-09	1.39166e-09	0.942023
IBD	Eo.BL.v2	-3.03184e-09	8.3653e-09	0.641485
MS	Eo.BL.v2	1.20672e-09	6.40723e-09	0.425306
PBC	Eo.BL.v2	9.75401e-09	1.84887e-08	0.2989
RA	Eo.BL.v2	-3.15765e-09	4.03839e-09	0.782866
AOA	Ep.5wk.MEC.Sca1+.Th	3.23037e-11	1.04701e-09	0.487693
B-ALL	Ep.5wk.MEC.Sca1+.Th	1.02397e-09	1.08285e-09	0.172171
CD	Ep.5wk.MEC.Sca1+.Th	-4.25761e-08	2.87293e-08	0.930827
HT	Ep.5wk.MEC.Sca1+.Th	-4.73761e-10	1.25179e-09	0.647459
IBD	Ep.5wk.MEC.Sca1+.Th	-4.48518e-09	7.37159e-09	0.728553
MS	Ep.5wk.MEC.Sca1+.Th	-2.52341e-09	5.05232e-09	0.691271
PBC	Ep.5wk.MEC.Sca1+.Th	-9.43541e-09	1.40097e-08	0.749682
RA	Ep.5wk.MEC.Sca1+.Th	-6.11459e-09	3.22438e-09	0.971044
AOA	Ep.5wk.MEChi.Th	2.69458e-10	1.05253e-09	0.398971
B-ALL	Ep.5wk.MEChi.Th	3.80655e-10	1.06535e-09	0.360432
CD	Ep.5wk.MEChi.Th	-6.28218e-09	3.47114e-08	0.57181
HT	Ep.5wk.MEChi.Th	-1.0433e-09	1.27936e-09	0.792603
IBD	Ep.5wk.MEChi.Th	5.54657e-09	9.20048e-09	0.273302
MS	Ep.5wk.MEChi.Th	-5.59186e-09	4.77298e-09	0.879314
PBC	Ep.5wk.MEChi.Th	-2.15295e-09	1.43536e-08	0.559615
RA	Ep.5wk.MEChi.Th	-3.82891e-09	3.24494e-09	0.880992
AOA	Ep.5wk.MEClo.Th	-1.53633e-11	9.62369e-10	0.506368
B-ALL	Ep.5wk.MEClo.Th	4.47377e-10	1.00842e-09	0.32865
CD	Ep.5wk.MEClo.Th	-9.15685e-08	2.75196e-08	0.999562
HT	Ep.5wk.MEClo.Th	-2.03811e-09	1.32511e-09	0.937984
IBD	Ep.5wk.MEClo.Th	-1.18318e-08	7.3446e-09	0.946404
MS	Ep.5wk.MEClo.Th	-6.43894e-09	4.69624e-09	0.914826
PBC	Ep.5wk.MEClo.Th	-1.37626e-08	1.38599e-08	0.83964
RA	Ep.5wk.MEClo.Th	-1.07631e-08	3.16696e-09	0.999661
AOA	Ep.8wk.CEC.Sca1+.Th	-1.27087e-09	1.02254e-09	0.89304
B-ALL	Ep.8wk.CEC.Sca1+.Th	5.90835e-10	1.14121e-09	0.302325
CD	Ep.8wk.CEC.Sca1+.Th	-6.47399e-08	2.83582e-08	0.988783
HT	Ep.8wk.CEC.Sca1+.Th	-1.94951e-09	1.32066e-09	0.93005
IBD	Ep.8wk.CEC.Sca1+.Th	-1.12912e-08	7.30147e-09	0.939
MS	Ep.8wk.CEC.Sca1+.Th	-1.07652e-09	5.2968e-09	0.580526
PBC	Ep.8wk.CEC.Sca1+.Th	1.69987e-08	1.6292e-08	0.148387
RA	Ep.8wk.CEC.Sca1+.Th	-7.24698e-09	3.46026e-09	0.981886
AOA	Ep.8wk.CEChi.Th	-1.16826e-09	1.18898e-09	0.837091
B-ALL	Ep.8wk.CEChi.Th	7.42348e-10	1.11909e-09	0.253554
CD	Ep.8wk.CEChi.Th	-6.68846e-08	3.53368e-08	0.970806
HT	Ep.8wk.CEChi.Th	-1.04618e-09	1.38232e-09	0.775423
IBD	Ep.8wk.CEChi.Th	-1.41394e-08	8.60481e-09	0.949829
MS	Ep.8wk.CEChi.Th	-2.74632e-09	5.41286e-09	0.694052
PBC	Ep.8wk.CEChi.Th	-6.55015e-09	1.56252e-08	0.662467
RA	Ep.8wk.CEChi.Th	-6.00135e-09	3.61219e-09	0.951685
AOA	Ep.8wk.MEChi.Th	-1.38997e-10	1.08157e-09	0.551129
B-ALL	Ep.8wk.MEChi.Th	9.03832e-10	1.07925e-09	0.201167
CD	Ep.8wk.MEChi.Th	-3.27241e-08	3.44533e-08	0.828896
HT	Ep.8wk.MEChi.Th	-8.33052e-10	1.29346e-09	0.740228
IBD	Ep.8wk.MEChi.Th	-5.85036e-11	8.89004e-09	0.502625
MS	Ep.8wk.MEChi.Th	-8.67914e-09	4.74779e-09	0.966228
PBC	Ep.8wk.MEChi.Th	-4.58708e-09	1.43996e-08	0.624968
RA	Ep.8wk.MEChi.Th	-4.85245e-09	3.29707e-09	0.929455
AOA	Ep.8wk.MEClo.Th	-6.53381e-10	9.59983e-10	0.751943
B-ALL	Ep.8wk.MEClo.Th	1.37809e-09	1.07163e-09	0.0992245
CD	Ep.8wk.MEClo.Th	-8.32822e-08	3.08899e-08	0.996492
HT	Ep.8wk.MEClo.Th	-1.29059e-09	1.37095e-09	0.826746
IBD	Ep.8wk.MEClo.Th	-1.17584e-08	7.92544e-09	0.931046
MS	Ep.8wk.MEClo.Th	-4.86128e-09	4.61604e-09	0.853859
PBC	Ep.8wk.MEClo.Th	-2.39679e-11	1.28915e-08	0.500742
RA	Ep.8wk.MEClo.Th	-8.71878e-09	3.25787e-09	0.996277
AOA	Ep.MEChi.Th	1.28184e-09	1.04008e-09	0.108891
B-ALL	Ep.MEChi.Th	-1.09933e-09	9.72649e-10	0.870812
CD	Ep.MEChi.Th	-2.82348e-08	3.14647e-08	0.815234
HT	Ep.MEChi.Th	-8.71086e-10	1.90152e-09	0.67656
IBD	Ep.MEChi.Th	2.65011e-09	8.43731e-09	0.376725
MS	Ep.MEChi.Th	-9.22464e-09	4.93286e-09	0.969261
PBC	Ep.MEChi.Th	1.01953e-08	1.60146e-08	0.262186
RA	Ep.MEChi.Th	-4.45951e-10	3.94469e-09	0.545005
AOA	Fi.MTS15+.Th	1.69244e-09	1.12311e-09	0.0659151
B-ALL	Fi.MTS15+.Th	8.80295e-10	1.03426e-09	0.197346
CD	Fi.MTS15+.Th	-1.65745e-08	3.12045e-08	0.702346
HT	Fi.MTS15+.Th	-1.16793e-10	1.83169e-09	0.52542
IBD	Fi.MTS15+.Th	-2.39944e-09	8.39099e-09	0.612543
MS	Fi.MTS15+.Th	3.87457e-09	5.40693e-09	0.236813
PBC	Fi.MTS15+.Th	-2.66613e-08	1.59176e-08	0.953029
RA	Fi.MTS15+.Th	-4.23614e-09	4.04184e-09	0.852698
AOA	Fi.Sk	6.71297e-10	1.13624e-09	0.277325
B-ALL	Fi.Sk	1.60289e-09	1.14394e-09	0.0805769
CD	Fi.Sk	-2.98535e-08	3.31569e-08	0.816038
HT	Fi.Sk	-2.65752e-09	1.33197e-09	0.976988
IBD	Fi.Sk	1.97204e-09	8.88451e-09	0.412171
MS	Fi.Sk	-4.77539e-10	5.94157e-09	0.53203
PBC	Fi.Sk	-1.83232e-08	1.47629e-08	0.892728
RA	Fi.Sk	-5.91589e-09	3.22473e-09	0.966713
AOA	FRC.Cad11.WT.v2	1.47353e-09	1.17078e-09	0.104088
B-ALL	FRC.Cad11.WT.v2	7.31754e-10	1.13182e-09	0.258969
CD	FRC.Cad11.WT.v2	-5.33099e-08	3.14943e-08	0.954742
HT	FRC.Cad11.WT.v2	-1.38899e-09	1.30997e-09	0.855501
IBD	FRC.Cad11.WT.v2	-2.593e-09	7.99105e-09	0.627215
MS	FRC.Cad11.WT.v2	5.30097e-10	5.70431e-09	0.46298
PBC	FRC.Cad11.WT.v2	-1.45701e-08	1.47297e-08	0.838709
RA	FRC.Cad11.WT.v2	-6.68975e-09	3.38786e-09	0.975845
AOA	FRC.MLN	-4.16396e-10	1.21598e-09	0.633989
B-ALL	FRC.MLN	1.47914e-10	1.12529e-09	0.447711
CD	FRC.MLN	-1.40975e-08	3.70665e-08	0.64815
HT	FRC.MLN	-2.57083e-09	1.34454e-09	0.972065
IBD	FRC.MLN	-1.0733e-09	9.27747e-09	0.546051
MS	FRC.MLN	2.38222e-10	6.16502e-09	0.484588
PBC	FRC.MLN	-5.93343e-09	1.49252e-08	0.654517
RA	FRC.MLN	-4.55511e-09	3.55229e-09	0.900132
AOA	FRC.SLN	5.04432e-10	1.15641e-09	0.331344
B-ALL	FRC.SLN	7.11748e-10	1.09406e-09	0.257666
CD	FRC.SLN	-5.29935e-08	3.32085e-08	0.944731
HT	FRC.SLN	-2.06671e-09	1.41834e-09	0.927461
IBD	FRC.SLN	-3.38689e-09	8.65563e-09	0.65221
MS	FRC.SLN	-2.19312e-09	6.03521e-09	0.641842
PBC	FRC.SLN	-9.25974e-09	1.50774e-08	0.730441
RA	FRC.SLN	-6.01702e-09	3.41093e-09	0.961138
AOA	FRC.SLN.CFA.d6.v2	1.50704e-09	1.15772e-09	0.0965033
B-ALL	FRC.SLN.CFA.d6.v2	8.83157e-10	1.07246e-09	0.205116
CD	FRC.SLN.CFA.d6.v2	-5.82014e-08	3.20376e-08	0.965366
HT	FRC.SLN.CFA.d6.v2	-8.58054e-10	1.3226e-09	0.741755
IBD	FRC.SLN.CFA.d6.v2	-2.6662e-09	8.19775e-09	0.627499
MS	FRC.SLN.CFA.d6.v2	-2.39421e-09	5.68853e-09	0.66308
PBC	FRC.SLN.CFA.d6.v2	-7.86942e-09	1.61502e-08	0.686965
RA	FRC.SLN.CFA.d6.v2	-6.62368e-09	3.44185e-09	0.972851
AOA	FRC.SLN.OT	3.93808e-10	1.25596e-09	0.376931
B-ALL	FRC.SLN.OT	7.19013e-10	1.10758e-09	0.258114
CD	FRC.SLN.OT	-6.74386e-08	3.51325e-08	0.972542
HT	FRC.SLN.OT	-2.02427e-09	1.43997e-09	0.920104
IBD	FRC.SLN.OT	-9.17449e-09	9.42306e-09	0.834878
MS	FRC.SLN.OT	1.46254e-09	6.29255e-09	0.408105
PBC	FRC.SLN.OT	-2.89057e-09	1.5726e-08	0.572918
RA	FRC.SLN.OT	-6.65659e-09	3.63595e-09	0.966433
AOA	FRC.SLN.v2	1.08125e-09	1.18845e-09	0.181465
B-ALL	FRC.SLN.v2	1.8337e-10	1.13676e-09	0.435925
CD	FRC.SLN.v2	-5.19537e-08	3.31416e-08	0.941516
HT	FRC.SLN.v2	-8.86168e-10	1.29815e-09	0.752582
IBD	FRC.SLN.v2	-3.89327e-09	8.62838e-09	0.674083
MS	FRC.SLN.v2	-1.93639e-09	5.92751e-09	0.628044
PBC	FRC.SLN.v2	-4.16613e-09	1.56822e-08	0.604749
RA	FRC.SLN.v2	-6.09137e-09	3.48385e-09	0.959808
AOA	GN.Arth.BM	3.82224e-10	1.75944e-09	0.41401
B-ALL	GN.Arth.BM	-1.09092e-09	1.2021e-09	0.817932
CD	GN.Arth.BM	1.20445e-07	4.71315e-08	0.00530165
HT	GN.Arth.BM	5.74787e-09	3.56774e-09	0.0535824
IBD	GN.Arth.BM	2.96597e-08	1.17245e-08	0.00570774
MS	GN.Arth.BM	1.4174e-08	9.29844e-09	0.0637124
PBC	GN.Arth.BM	-2.41252e-08	2.52833e-08	0.830008
RA	GN.Arth.BM	6.84187e-09	5.02177e-09	0.0865292
AOA	GN.Arth.SynF	5.21909e-10	1.17052e-09	0.327843
B-ALL	GN.Arth.SynF	-4.82268e-11	1.18998e-09	0.516164
CD	GN.Arth.SynF	4.81309e-08	4.29296e-08	0.13111
HT	GN.Arth.SynF	3.70664e-09	3.17699e-09	0.121663
IBD	GN.Arth.SynF	1.29551e-08	1.06592e-08	0.112109
MS	GN.Arth.SynF	1.16166e-08	7.96529e-09	0.0723654
PBC	GN.Arth.SynF	-1.00162e-08	2.01672e-08	0.690284
RA	GN.Arth.SynF	6.78968e-11	4.58065e-09	0.494087
AOA	GN.Bl	7.58299e-10	1.58206e-09	0.315859
B-ALL	GN.Bl	-6.37314e-10	1.28871e-09	0.689537
CD	GN.Bl	3.357e-08	4.23839e-08	0.214167
HT	GN.Bl	2.05174e-09	2.06365e-09	0.160056
IBD	GN.Bl	1.0334e-08	1.07462e-08	0.168115
MS	GN.Bl	6.86191e-09	8.24047e-09	0.202504
PBC	GN.Bl	-8.04473e-09	2.48703e-08	0.626829
RA	GN.Bl	3.78305e-09	5.51536e-09	0.246384
AOA	GN.Bl.v2	-2.02418e-09	1.29973e-09	0.940311
B-ALL	GN.Bl.v2	-1.36615e-09	1.06063e-09	0.901137
CD	GN.Bl.v2	1.53234e-09	4.13431e-08	0.485217
HT	GN.Bl.v2	1.12463e-09	1.42397e-09	0.214826
IBD	GN.Bl.v2	5.11629e-09	1.11106e-08	0.322584
MS	GN.Bl.v2	-5.65874e-09	7.11025e-09	0.786942
PBC	GN.Bl.v2	-3.82803e-08	1.94046e-08	0.975738
RA	GN.Bl.v2	6.67124e-10	4.72946e-09	0.443912
AOA	GN.BM	2.24932e-09	1.77458e-09	0.102484
B-ALL	GN.BM	-1.15733e-09	1.19175e-09	0.834255
CD	GN.BM	1.20969e-07	4.54853e-08	0.00391248
HT	GN.BM	5.22338e-09	2.93384e-09	0.0375057
IBD	GN.BM	2.7847e-08	1.17723e-08	0.00900367
MS	GN.BM	1.68655e-09	7.77211e-09	0.414104
PBC	GN.BM	-3.37709e-08	2.41367e-08	0.919116
RA	GN.BM	6.93021e-09	6.01952e-09	0.124806
AOA	GN.Thio.PC	6.37045e-10	2.04411e-09	0.377654
B-ALL	GN.Thio.PC	-2.19669e-09	1.21465e-09	0.964735
CD	GN.Thio.PC	1.67102e-07	6.11708e-08	0.00315016
HT	GN.Thio.PC	4.63594e-09	3.79297e-09	0.110808
IBD	GN.Thio.PC	3.77609e-08	1.35291e-08	0.0026265
MS	GN.Thio.PC	1.03618e-09	8.64128e-09	0.452277
PBC	GN.Thio.PC	-7.18541e-09	2.4569e-08	0.615032
RA	GN.Thio.PC	4.44171e-09	5.25704e-09	0.199081
AOA	GN.UrAc.PC	1.68728e-09	1.87582e-09	0.184195
B-ALL	GN.UrAc.PC	-1.41211e-09	1.16662e-09	0.886943
CD	GN.UrAc.PC	8.36064e-08	4.94637e-08	0.0454892
HT	GN.UrAc.PC	8.58499e-10	2.09328e-09	0.340858
IBD	GN.UrAc.PC	2.58654e-08	1.18635e-08	0.0146197
MS	GN.UrAc.PC	-1.38995e-09	7.90124e-09	0.56982
PBC	GN.UrAc.PC	4.48728e-09	2.04445e-08	0.413136
RA	GN.UrAc.PC	-6.56183e-10	5.11719e-09	0.551017
AOA	ILC1.CD127+.SI	1.09585e-09	1.44954e-09	0.224826
B-ALL	ILC1.CD127+.SI	-2.1725e-09	1.09726e-09	0.976144
CD	ILC1.CD127+.SI	1.05636e-07	4.99645e-08	0.0172481
HT	ILC1.CD127+.SI	-2.47839e-10	1.63913e-09	0.560092
IBD	ILC1.CD127+.SI	2.58377e-08	1.23824e-08	0.0184601
MS	ILC1.CD127+.SI	8.36649e-09	7.23957e-09	0.12391
PBC	ILC1.CD127+.SI	7.65839e-09	2.2517e-08	0.366885
RA	ILC1.CD127+.SI	4.76588e-09	4.2951e-09	0.133584
AOA	ILC1.CD127+.Sp	9.75412e-11	1.59437e-09	0.475609
B-ALL	ILC1.CD127+.Sp	-9.55819e-10	9.07185e-10	0.853969
CD	ILC1.CD127+.Sp	1.12784e-08	4.00985e-08	0.389252
HT	ILC1.CD127+.Sp	-1.84531e-09	1.21635e-09	0.935378
IBD	ILC1.CD127+.Sp	5.44124e-09	1.06799e-08	0.305206
MS	ILC1.CD127+.Sp	2.38533e-09	6.17177e-09	0.349567
PBC	ILC1.CD127+.Sp	1.90448e-08	1.72467e-08	0.13474
RA	ILC1.CD127+.Sp	-4.04056e-09	3.82463e-09	0.85462
AOA	ILC1.CD49b-.Lv	9.61195e-11	1.33601e-09	0.471323
B-ALL	ILC1.CD49b-.Lv	-1.18878e-09	1.02719e-09	0.876427
CD	ILC1.CD49b-.Lv	-6.084e-08	4.06903e-08	0.932568
HT	ILC1.CD49b-.Lv	-2.84175e-09	1.33797e-09	0.983162
IBD	ILC1.CD49b-.Lv	-6.08988e-09	1.02337e-08	0.724105
MS	ILC1.CD49b-.Lv	-1.42282e-08	5.22557e-09	0.996763
PBC	ILC1.CD49b-.Lv	-5.86092e-09	1.78804e-08	0.628463
RA	ILC1.CD49b-.Lv	-9.69933e-09	4.15489e-09	0.990214
AOA	ILC2.SI	-5.49258e-11	1.07825e-09	0.520313
B-ALL	ILC2.SI	-1.12112e-09	9.6828e-10	0.876537
CD	ILC2.SI	-1.93491e-08	3.2299e-08	0.725434
HT	ILC2.SI	-2.70788e-09	1.4438e-09	0.96964
IBD	ILC2.SI	-3.79359e-09	7.58668e-09	0.691474
MS	ILC2.SI	-5.4145e-09	5.60022e-09	0.833187
PBC	ILC2.SI	1.87469e-09	1.64768e-08	0.454707
RA	ILC2.SI	-4.58732e-09	4.30926e-09	0.856455
AOA	ILC3.NKp46-.4-.SI	1.66637e-09	1.6766e-09	0.160137
B-ALL	ILC3.NKp46-.4-.SI	2.50967e-09	1.91405e-09	0.0948985
CD	ILC3.NKp46-.4-.SI	-1.96768e-08	3.6742e-08	0.703862
HT	ILC3.NKp46-.4-.SI	6.42752e-10	1.44725e-09	0.328478
IBD	ILC3.NKp46-.4-.SI	1.07933e-08	9.0693e-09	0.117004
MS	ILC3.NKp46-.4-.SI	5.69183e-10	6.28297e-09	0.463909
PBC	ILC3.NKp46-.4-.SI	-4.15695e-09	1.66913e-08	0.598338
RA	ILC3.NKp46-.4-.SI	-1.46475e-09	3.91288e-09	0.645924
AOA	ILC3.NKp46-.4+.SI	2.50382e-09	1.57757e-09	0.0562409
B-ALL	ILC3.NKp46-.4+.SI	2.42802e-09	1.73839e-09	0.0812501
CD	ILC3.NKp46-.4+.SI	-3.55149e-08	3.59822e-08	0.838182
HT	ILC3.NKp46-.4+.SI	-1.29462e-09	1.23047e-09	0.85363
IBD	ILC3.NKp46-.4+.SI	4.08322e-09	8.36654e-09	0.31276
MS	ILC3.NKp46-.4+.SI	5.23326e-09	6.38261e-09	0.206129
PBC	ILC3.NKp46-.4+.SI	3.76866e-09	1.59777e-08	0.406767
RA	ILC3.NKp46-.4+.SI	-3.53975e-09	3.85222e-09	0.820922
AOA	ILC3.NKp46+.Rorgthi.SI	2.03468e-09	1.58237e-09	0.0992496
B-ALL	ILC3.NKp46+.Rorgthi.SI	-1.77535e-09	1.08579e-09	0.948984
CD	ILC3.NKp46+.Rorgthi.SI	-1.29687e-08	3.62432e-08	0.639762
HT	ILC3.NKp46+.Rorgthi.SI	1.41072e-09	1.69715e-09	0.202921
IBD	ILC3.NKp46+.Rorgthi.SI	5.24094e-09	8.93361e-09	0.278718
MS	ILC3.NKp46+.Rorgthi.SI	4.89512e-09	6.5749e-09	0.228282
PBC	ILC3.NKp46+.Rorgthi.SI	3.18266e-08	1.99994e-08	0.0557619
RA	ILC3.NKp46+.Rorgthi.SI	2.30044e-09	4.08954e-09	0.286882
AOA	LEC.SLN	-1.54638e-11	1.29155e-09	0.504776
B-ALL	LEC.SLN	1.86244e-09	1.15815e-09	0.0539048
CD	LEC.SLN	-8.16204e-08	3.32474e-08	0.992955
HT	LEC.SLN	-2.18725e-09	1.42223e-09	0.937964
IBD	LEC.SLN	-3.73483e-09	8.77833e-09	0.664749
MS	LEC.SLN	3.42362e-09	5.99788e-09	0.284066
PBC	LEC.SLN	-1.10316e-08	1.54465e-08	0.762443
RA	LEC.SLN	-2.11287e-09	3.5822e-09	0.722346
AOA	LEC.SLN.CFA.d6.v2	1.90234e-10	1.02801e-09	0.426595
B-ALL	LEC.SLN.CFA.d6.v2	1.09193e-09	1.04953e-09	0.149078
CD	LEC.SLN.CFA.d6.v2	-9.83429e-08	3.2193e-08	0.998874
HT	LEC.SLN.CFA.d6.v2	-3.72886e-10	1.48544e-09	0.599104
IBD	LEC.SLN.CFA.d6.v2	-1.32039e-08	8.32386e-09	0.943661
MS	LEC.SLN.CFA.d6.v2	-4.29848e-09	5.41893e-09	0.786179
PBC	LEC.SLN.CFA.d6.v2	-3.15166e-08	1.49815e-08	0.982298
RA	LEC.SLN.CFA.d6.v2	-6.03623e-09	3.46155e-09	0.959403
AOA	LEC.SLN.v2	-3.68838e-10	1.16571e-09	0.624152
B-ALL	LEC.SLN.v2	1.00702e-09	1.17131e-09	0.194967
CD	LEC.SLN.v2	-1.04323e-07	3.50756e-08	0.998531
HT	LEC.SLN.v2	-1.41636e-09	1.46266e-09	0.833565
IBD	LEC.SLN.v2	-1.10588e-08	9.10754e-09	0.887673
MS	LEC.SLN.v2	-4.25151e-09	5.68535e-09	0.77271
PBC	LEC.SLN.v2	-4.13972e-08	1.50519e-08	0.997023
RA	LEC.SLN.v2	-8.63637e-09	3.58328e-09	0.992028
AOA	LN.TR.14w.B6	3.15731e-09	1.50893e-09	0.0182007
B-ALL	LN.TR.14w.B6	6.74032e-10	1.38075e-09	0.312716
CD	LN.TR.14w.B6	1.76266e-07	4.93277e-08	0.000176205
HT	LN.TR.14w.B6	7.82345e-09	3.93465e-09	0.0233866
IBD	LN.TR.14w.B6	4.08132e-08	1.22319e-08	0.000424014
MS	LN.TR.14w.B6	1.74101e-08	7.28908e-09	0.00845832
PBC	LN.TR.14w.B6	4.89097e-08	2.03688e-08	0.00817049
RA	LN.TR.14w.B6	1.60568e-08	6.98485e-09	0.010758
AOA	MC.digest.PC	-1.16194e-09	1.11018e-09	0.852364
B-ALL	MC.digest.PC	9.87817e-10	1.78623e-09	0.290126
CD	MC.digest.PC	-7.20581e-09	3.9945e-08	0.571578
HT	MC.digest.PC	-2.89186e-09	1.36196e-09	0.983136
IBD	MC.digest.PC	-5.15586e-09	9.21173e-09	0.71216
MS	MC.digest.PC	5.94807e-09	5.61327e-09	0.144653
PBC	MC.digest.PC	-5.18631e-09	1.41389e-08	0.64312
RA	MC.digest.PC	-4.51339e-09	3.61227e-09	0.894252
AOA	MC.Es	7.09514e-10	1.30333e-09	0.293087
B-ALL	MC.Es	2.47921e-09	1.86259e-09	0.0915849
CD	MC.Es	-3.08665e-08	3.71706e-08	0.796844
HT	MC.Es	-2.40346e-09	1.36499e-09	0.960862
IBD	MC.Es	-8.43665e-09	9.08737e-09	0.823398
MS	MC.Es	6.30295e-10	6.12179e-09	0.458998
PBC	MC.Es	-2.00999e-08	1.68982e-08	0.882872
RA	MC.Es	-5.8604e-09	3.61404e-09	0.947552
AOA	MC.PC	-1.04301e-09	1.1231e-09	0.823473
B-ALL	MC.PC	1.70306e-09	1.82172e-09	0.174929
CD	MC.PC	1.99292e-08	3.73303e-08	0.296719
HT	MC.PC	-3.64288e-09	1.24237e-09	0.998317
IBD	MC.PC	-2.4577e-09	9.06095e-09	0.606897
MS	MC.PC	-2.94999e-09	5.27188e-09	0.712114
PBC	MC.PC	-9.76026e-09	1.64298e-08	0.723763
RA	MC.PC	-5.51071e-09	3.47382e-09	0.94367
AOA	MC.Sk	1.14345e-09	1.46436e-09	0.217444
B-ALL	MC.Sk	2.15656e-09	1.83705e-09	0.120213
CD	MC.Sk	1.34498e-08	4.29223e-08	0.377006
HT	MC.Sk	-2.28065e-09	1.13858e-09	0.977415
IBD	MC.Sk	-9.23326e-09	9.48717e-09	0.834782
MS	MC.Sk	-6.76224e-09	5.62131e-09	0.885505
PBC	MC.Sk	-3.5906e-08	1.74056e-08	0.980439
RA	MC.Sk	-6.65734e-09	3.79605e-09	0.960264
AOA	MC.To	4.20437e-10	1.32923e-09	0.375887
B-ALL	MC.To	1.19062e-09	1.87381e-09	0.262584
CD	MC.To	-2.34684e-08	4.3202e-08	0.706513
HT	MC.To	-3.28504e-09	1.2406e-09	0.995951
IBD	MC.To	-8.18462e-09	9.73911e-09	0.799654
MS	MC.To	3.13228e-09	6.02606e-09	0.301605
PBC	MC.To	-5.19476e-08	1.62412e-08	0.999309
RA	MC.To	-5.94827e-09	4.12713e-09	0.925244
AOA	MC.Tr	1.15968e-09	1.52784e-09	0.223918
B-ALL	MC.Tr	2.74281e-09	1.91747e-09	0.0762964
CD	MC.Tr	3.9758e-08	4.18629e-08	0.171128
HT	MC.Tr	-2.31374e-09	1.42817e-09	0.947392
IBD	MC.Tr	3.52581e-09	1.04217e-08	0.367564
MS	MC.Tr	1.94303e-09	5.70474e-09	0.366703
PBC	MC.Tr	-3.83306e-08	1.74116e-08	0.986148
RA	MC.Tr	-2.16979e-09	4.15318e-09	0.699318
AOA	MEChi.GFP-.Adult	1.32738e-09	1.47387e-09	0.183898
B-ALL	MEChi.GFP-.Adult	2.4934e-10	1.01632e-09	0.403098
CD	MEChi.GFP-.Adult	-1.74839e-08	3.30924e-08	0.701367
HT	MEChi.GFP-.Adult	-2.3105e-09	1.26826e-09	0.965756
IBD	MEChi.GFP-.Adult	9.59726e-09	8.52518e-09	0.130135
MS	MEChi.GFP-.Adult	-6.90225e-09	5.01349e-09	0.915703
PBC	MEChi.GFP-.Adult	-4.02814e-09	1.38106e-08	0.614731
RA	MEChi.GFP-.Adult	-4.18956e-09	3.20817e-09	0.904207
AOA	MEChi.GFP+.Adult	8.38969e-10	1.10759e-09	0.224383
B-ALL	MEChi.GFP+.Adult	3.33023e-10	1.05802e-09	0.376472
CD	MEChi.GFP+.Adult	-3.46815e-08	3.59891e-08	0.832393
HT	MEChi.GFP+.Adult	-2.39761e-09	1.29969e-09	0.967463
IBD	MEChi.GFP+.Adult	-1.57742e-09	9.2121e-09	0.56798
MS	MEChi.GFP+.Adult	-9.40397e-09	4.67626e-09	0.977837
PBC	MEChi.GFP+.Adult	5.02795e-09	1.4767e-08	0.366746
RA	MEChi.GFP+.Adult	-4.09201e-09	3.4218e-09	0.884125
AOA	MEChi.GFP+.Adult.KO	-6.94819e-10	1.14396e-09	0.728201
B-ALL	MEChi.GFP+.Adult.KO	2.92268e-10	1.04034e-09	0.38938
CD	MEChi.GFP+.Adult.KO	-2.22e-08	3.27611e-08	0.750998
HT	MEChi.GFP+.Adult.KO	-1.04937e-09	1.30708e-09	0.788967
IBD	MEChi.GFP+.Adult.KO	-2.41652e-10	8.46988e-09	0.511381
MS	MEChi.GFP+.Adult.KO	8.31574e-10	5.45404e-09	0.439408
PBC	MEChi.GFP+.Adult.KO	2.54613e-08	1.53206e-08	0.0482669
RA	MEChi.GFP+.Adult.KO	-1.00702e-10	2.94124e-09	0.513656
AOA	MF.103-11b+.Lu	1.36375e-09	1.9537e-09	0.242578
B-ALL	MF.103-11b+.Lu	6.05009e-10	1.08054e-09	0.287769
CD	MF.103-11b+.Lu	9.40168e-08	4.1e-08	0.0109213
HT	MF.103-11b+.Lu	1.15964e-09	2.25655e-09	0.303661
IBD	MF.103-11b+.Lu	2.03079e-08	1.08232e-08	0.0303054
MS	MF.103-11b+.Lu	1.77104e-08	6.76043e-09	0.00440008
PBC	MF.103-11b+.Lu	-1.01132e-09	1.95221e-08	0.520658
RA	MF.103-11b+.Lu	5.35885e-09	4.03366e-09	0.0920008
AOA	MF.103-11b+.Salm3.SI	-4.55424e-10	1.32085e-09	0.634876
B-ALL	MF.103-11b+.Salm3.SI	-9.89092e-10	1.28861e-09	0.778627
CD	MF.103-11b+.Salm3.SI	7.73565e-08	4.11389e-08	0.0300286
HT	MF.103-11b+.Salm3.SI	-1.4373e-09	1.34893e-09	0.856677
IBD	MF.103-11b+.Salm3.SI	1.97259e-08	1.11262e-08	0.0381203
MS	MF.103-11b+.Salm3.SI	1.57946e-08	8.16787e-09	0.0265719
PBC	MF.103-11b+.Salm3.SI	6.11421e-09	1.8524e-08	0.370674
RA	MF.103-11b+.Salm3.SI	2.22287e-09	4.24871e-09	0.300422
AOA	MF.103-11b+.SI	-7.2629e-10	1.27749e-09	0.715162
B-ALL	MF.103-11b+.SI	-1.07089e-09	1.23705e-09	0.806668
CD	MF.103-11b+.SI	1.07569e-07	4.60875e-08	0.00979732
HT	MF.103-11b+.SI	-4.77667e-10	1.79553e-09	0.604892
IBD	MF.103-11b+.SI	1.96637e-08	1.19192e-08	0.0494972
MS	MF.103-11b+.SI	1.75531e-08	7.05391e-09	0.00641551
PBC	MF.103-11b+.SI	-5.43998e-09	1.86993e-08	0.614443
RA	MF.103-11b+.SI	3.29068e-09	3.9978e-09	0.205219
AOA	MF.11c-11b+.Lu	2.36012e-10	1.28604e-09	0.427196
B-ALL	MF.11c-11b+.Lu	5.04453e-10	1.09211e-09	0.322075
CD	MF.11c-11b+.Lu	4.07879e-08	3.75681e-08	0.138804
HT	MF.11c-11b+.Lu	-1.17693e-10	1.22415e-09	0.538296
IBD	MF.11c-11b+.Lu	-6.77681e-09	9.54053e-09	0.761247
MS	MF.11c-11b+.Lu	6.21019e-09	7.18066e-09	0.193561
PBC	MF.11c-11b+.Lu	-9.98561e-09	1.83574e-08	0.706764
RA	MF.11c-11b+.Lu	-3.41354e-09	4.22778e-09	0.790284
AOA	MF.11cloSer.Salm3.SI	6.71436e-10	1.33026e-09	0.30687
B-ALL	MF.11cloSer.Salm3.SI	-1.12616e-09	1.29732e-09	0.807321
CD	MF.11cloSer.Salm3.SI	1.58847e-07	4.81375e-08	0.000483663
HT	MF.11cloSer.Salm3.SI	1.06529e-09	1.66838e-09	0.261569
IBD	MF.11cloSer.Salm3.SI	3.26497e-08	1.1703e-08	0.00263656
MS	MF.11cloSer.Salm3.SI	2.70787e-08	8.0203e-09	0.000367384
PBC	MF.11cloSer.Salm3.SI	1.77126e-08	1.93229e-08	0.17966
RA	MF.11cloSer.Salm3.SI	9.88795e-09	4.71524e-09	0.0179959
AOA	MF.11cloSer.SI	1.50348e-09	1.84529e-09	0.207604
B-ALL	MF.11cloSer.SI	-6.95052e-10	1.19266e-09	0.719977
CD	MF.11cloSer.SI	1.2458e-07	4.25046e-08	0.00168949
HT	MF.11cloSer.SI	1.36156e-10	1.77994e-09	0.469513
IBD	MF.11cloSer.SI	1.94038e-08	1.05956e-08	0.0335278
MS	MF.11cloSer.SI	1.49772e-08	7.14489e-09	0.0180316
PBC	MF.11cloSer.SI	-3.72472e-09	1.97038e-08	0.574967
RA	MF.11cloSer.SI	5.25454e-09	4.28737e-09	0.110177
AOA	MF.169+11chi.SLN	-2.26812e-09	1.12933e-09	0.977698
B-ALL	MF.169+11chi.SLN	-4.33156e-10	1.08438e-09	0.655219
CD	MF.169+11chi.SLN	3.48187e-08	4.43453e-08	0.216176
HT	MF.169+11chi.SLN	-5.70992e-10	2.26071e-09	0.599701
IBD	MF.169+11chi.SLN	6.56602e-09	1.02646e-08	0.261192
MS	MF.169+11chi.SLN	8.37476e-09	6.11903e-09	0.0855556
PBC	MF.169+11chi.SLN	-2.35267e-09	1.91518e-08	0.548884
RA	MF.169+11chi.SLN	-7.34264e-10	4.42958e-09	0.565829
AOA	MF.480hi.LV.Naive	-5.92483e-10	1.20051e-09	0.68918
B-ALL	MF.480hi.LV.Naive	2.6305e-11	9.79142e-10	0.489284
CD	MF.480hi.LV.Naive	2.22989e-09	3.66761e-08	0.475759
HT	MF.480hi.LV.Naive	-8.87624e-10	1.36474e-09	0.742283
IBD	MF.480hi.LV.Naive	2.28601e-09	9.76527e-09	0.407455
MS	MF.480hi.LV.Naive	8.049e-09	5.97018e-09	0.0887971
PBC	MF.480hi.LV.Naive	2.38501e-08	1.81974e-08	0.0949906
RA	MF.480hi.LV.Naive	-6.11353e-09	4.05281e-09	0.934282
AOA	MF.480int.LV.Naive	-1.92453e-10	1.14341e-09	0.566832
B-ALL	MF.480int.LV.Naive	1.5855e-10	1.0201e-09	0.438242
CD	MF.480int.LV.Naive	1.1873e-08	3.45234e-08	0.365456
HT	MF.480int.LV.Naive	-8.64571e-10	1.5499e-09	0.711518
IBD	MF.480int.LV.Naive	4.41571e-09	9.24699e-09	0.316492
MS	MF.480int.LV.Naive	7.11228e-09	5.34328e-09	0.0915828
PBC	MF.480int.LV.Naive	1.16322e-08	1.80641e-08	0.259806
RA	MF.480int.LV.Naive	-1.65417e-09	4.21742e-09	0.652554
AOA	MF.Alv.Lu	5.80801e-10	1.7632e-09	0.370926
B-ALL	MF.Alv.Lu	-6.99998e-10	9.44661e-10	0.770655
CD	MF.Alv.Lu	3.19309e-09	4.04788e-08	0.468563
HT	MF.Alv.Lu	-6.94208e-10	1.1963e-09	0.719143
IBD	MF.Alv.Lu	-2.49357e-09	9.7822e-09	0.600603
MS	MF.Alv.Lu	6.37935e-09	6.97833e-09	0.180315
PBC	MF.Alv.Lu	-3.63711e-08	1.8219e-08	0.977051
RA	MF.Alv.Lu	-1.87509e-09	4.53574e-09	0.660344
AOA	MF.AT.v2	1.41818e-10	1.5747e-09	0.46412
B-ALL	MF.AT.v2	-8.78022e-11	1.03092e-09	0.533936
CD	MF.AT.v2	5.38211e-08	4.4968e-08	0.115677
HT	MF.AT.v2	-3.03884e-10	1.3978e-09	0.586052
IBD	MF.AT.v2	6.43759e-09	1.04551e-08	0.269035
MS	MF.AT.v2	9.26874e-10	6.20936e-09	0.44067
PBC	MF.AT.v2	-1.10362e-09	1.77662e-08	0.524766
RA	MF.AT.v2	-4.73648e-09	3.65542e-09	0.902468
AOA	MF.BM	3.30782e-09	2.12448e-09	0.059735
B-ALL	MF.BM	-1.24299e-09	1.40566e-09	0.811727
CD	MF.BM	5.41482e-08	5.14289e-08	0.146199
HT	MF.BM	1.29038e-09	3.65398e-09	0.36199
IBD	MF.BM	1.67717e-09	1.29646e-08	0.448534
MS	MF.BM	-4.64508e-09	9.0924e-09	0.695281
PBC	MF.BM	1.33511e-08	2.49493e-08	0.29628
RA	MF.BM	3.39415e-09	6.26462e-09	0.293979
AOA	MF.F480hi.ctrl.PC	6.89372e-10	1.3783e-09	0.308481
B-ALL	MF.F480hi.ctrl.PC	-1.36862e-09	9.40173e-10	0.927264
CD	MF.F480hi.ctrl.PC	-4.76499e-09	3.54922e-08	0.553399
HT	MF.F480hi.ctrl.PC	4.22545e-10	1.80985e-09	0.407698
IBD	MF.F480hi.ctrl.PC	-2.63929e-10	8.86266e-09	0.511879
MS	MF.F480hi.ctrl.PC	-4.40668e-11	6.58199e-09	0.502671
PBC	MF.F480hi.ctrl.PC	1.81066e-10	1.7816e-08	0.495946
RA	MF.F480hi.ctrl.PC	-1.99245e-10	4.73824e-09	0.516771
AOA	MF.F480hi.Gata6ko.PC	-1.79769e-09	1.23778e-09	0.926797
B-ALL	MF.F480hi.Gata6ko.PC	-7.27789e-10	9.70577e-10	0.773328
CD	MF.F480hi.Gata6ko.PC	-3.49162e-08	3.96493e-08	0.81074
HT	MF.F480hi.Gata6ko.PC	1.8241e-10	1.85295e-09	0.46079
IBD	MF.F480hi.Gata6ko.PC	-5.93518e-09	9.63411e-09	0.731072
MS	MF.F480hi.Gata6ko.PC	4.80088e-09	7.45274e-09	0.259731
PBC	MF.F480hi.Gata6ko.PC	-1.09351e-08	1.81823e-08	0.726218
RA	MF.F480hi.Gata6ko.PC	-2.42688e-09	4.75203e-09	0.69522
AOA	MF.II+480lo.PC	-5.21238e-11	1.6804e-09	0.512373
B-ALL	MF.II+480lo.PC	4.68587e-10	1.17023e-09	0.344422
CD	MF.II+480lo.PC	9.0273e-08	4.82453e-08	0.0306639
HT	MF.II+480lo.PC	3.03308e-09	2.02185e-09	0.0667873
IBD	MF.II+480lo.PC	2.35056e-08	1.18966e-08	0.0240874
MS	MF.II+480lo.PC	1.73688e-08	7.95007e-09	0.0144541
PBC	MF.II+480lo.PC	-6.31669e-09	2.01662e-08	0.622948
RA	MF.II+480lo.PC	2.20871e-09	4.82601e-09	0.323596
AOA	MF.II-480hi.PC	-6.70065e-10	1.35311e-09	0.689771
B-ALL	MF.II-480hi.PC	-2.151e-10	1.07092e-09	0.579594
CD	MF.II-480hi.PC	4.06228e-08	4.26555e-08	0.170461
HT	MF.II-480hi.PC	6.0281e-10	1.82422e-09	0.370531
IBD	MF.II-480hi.PC	3.98786e-09	1.04036e-08	0.350743
MS	MF.II-480hi.PC	1.30781e-08	7.07134e-09	0.0321966
PBC	MF.II-480hi.PC	3.08964e-09	1.97144e-08	0.437733
RA	MF.II-480hi.PC	5.60518e-09	5.19962e-09	0.140517
AOA	MF.Lu	3.12649e-10	1.73245e-09	0.428393
B-ALL	MF.Lu	-5.79969e-10	1.04644e-09	0.710289
CD	MF.Lu	1.48161e-08	3.85772e-08	0.350465
HT	MF.Lu	-1.75898e-09	1.19277e-09	0.929853
IBD	MF.Lu	-3.22533e-09	9.87009e-09	0.628082
MS	MF.Lu	3.95089e-09	7.01879e-09	0.286751
PBC	MF.Lu	-3.88854e-08	1.88131e-08	0.98063
RA	MF.Lu	-1.93813e-09	3.89598e-09	0.69057
AOA	MF.Medl.SLN	-2.46044e-10	1.36974e-09	0.571278
B-ALL	MF.Medl.SLN	4.4377e-10	1.00405e-09	0.329252
CD	MF.Medl.SLN	-4.56207e-08	3.45094e-08	0.906912
HT	MF.Medl.SLN	-6.29488e-10	2.27115e-09	0.609174
IBD	MF.Medl.SLN	-5.90151e-09	8.80474e-09	0.748656
MS	MF.Medl.SLN	4.17712e-11	6.40751e-09	0.497399
PBC	MF.Medl.SLN	-1.59739e-08	1.38332e-08	0.875904
RA	MF.Medl.SLN	-5.09482e-09	3.85224e-09	0.907009
AOA	MF.Microglia.CNS	1.61523e-10	1.32265e-09	0.451402
B-ALL	MF.Microglia.CNS	-4.5638e-10	1.0937e-09	0.661763
CD	MF.Microglia.CNS	1.61585e-08	3.98823e-08	0.342682
HT	MF.Microglia.CNS	-3.35299e-10	1.71331e-09	0.577578
IBD	MF.Microglia.CNS	-2.91241e-09	9.49524e-09	0.620473
MS	MF.Microglia.CNS	1.4844e-08	6.64789e-09	0.0127784
PBC	MF.Microglia.CNS	2.95364e-08	2.06665e-08	0.0764744
RA	MF.Microglia.CNS	6.71246e-09	4.47304e-09	0.0667235
AOA	MF.PPAR-.Lu	7.15003e-10	1.80288e-09	0.345835
B-ALL	MF.PPAR-.Lu	-1.27804e-09	1.04107e-09	0.890204
CD	MF.PPAR-.Lu	-3.9164e-09	4.09376e-08	0.538108
HT	MF.PPAR-.Lu	-1.82442e-09	1.30068e-09	0.919642
IBD	MF.PPAR-.Lu	-8.74703e-10	9.78049e-09	0.535631
MS	MF.PPAR-.Lu	6.28023e-09	7.40835e-09	0.198296
PBC	MF.PPAR-.Lu	-2.96618e-08	1.90435e-08	0.940333
RA	MF.PPAR-.Lu	-3.63393e-09	4.30071e-09	0.800933
AOA	MF.RP.Sp	-6.47432e-10	1.21209e-09	0.703379
B-ALL	MF.RP.Sp	-8.88586e-10	1.14726e-09	0.780691
CD	MF.RP.Sp	2.72231e-08	3.91171e-08	0.243234
HT	MF.RP.Sp	5.14844e-10	1.66367e-09	0.378485
IBD	MF.RP.Sp	4.68257e-09	1.02536e-08	0.323952
MS	MF.RP.Sp	1.70224e-08	6.9471e-09	0.00713713
PBC	MF.RP.Sp	1.06515e-08	1.64892e-08	0.259151
RA	MF.RP.Sp	-2.67177e-09	4.36011e-09	0.729988
AOA	MF.Sbcaps.SLN	-1.6265e-09	1.32875e-09	0.889541
B-ALL	MF.Sbcaps.SLN	-8.27917e-10	9.44582e-10	0.809618
CD	MF.Sbcaps.SLN	-4.98483e-08	3.32481e-08	0.9331
HT	MF.Sbcaps.SLN	6.54885e-10	2.26704e-09	0.386339
IBD	MF.Sbcaps.SLN	-5.15337e-09	8.83876e-09	0.720068
MS	MF.Sbcaps.SLN	-2.8525e-09	5.79192e-09	0.688816
PBC	MF.Sbcaps.SLN	-1.15421e-08	1.45497e-08	0.786195
RA	MF.Sbcaps.SLN	-5.66095e-10	3.82849e-09	0.558775
AOA	MF.Thio5.II+480int.PC	6.71427e-10	1.32402e-09	0.306039
B-ALL	MF.Thio5.II+480int.PC	-1.00477e-09	1.07901e-09	0.824124
CD	MF.Thio5.II+480int.PC	2.72218e-08	4.22071e-08	0.259477
HT	MF.Thio5.II+480int.PC	1.29313e-09	1.94062e-09	0.252593
IBD	MF.Thio5.II+480int.PC	-1.51407e-09	1.07873e-08	0.555811
MS	MF.Thio5.II+480int.PC	1.50119e-08	7.57794e-09	0.0237955
PBC	MF.Thio5.II+480int.PC	-9.79518e-09	1.89166e-08	0.697704
RA	MF.Thio5.II+480int.PC	1.8693e-09	5.54212e-09	0.367949
AOA	MF.Thio5.II+480lo.PC	-1.57706e-10	1.42202e-09	0.544154
B-ALL	MF.Thio5.II+480lo.PC	-9.23857e-11	1.12845e-09	0.532625
CD	MF.Thio5.II+480lo.PC	3.31807e-08	4.38387e-08	0.22456
HT	MF.Thio5.II+480lo.PC	2.70587e-09	1.89129e-09	0.0762579
IBD	MF.Thio5.II+480lo.PC	3.9442e-09	1.09646e-08	0.359528
MS	MF.Thio5.II+480lo.PC	1.75679e-08	7.49358e-09	0.00952906
PBC	MF.Thio5.II+480lo.PC	-1.33791e-08	2.03719e-08	0.744327
RA	MF.Thio5.II+480lo.PC	5.90629e-09	4.56488e-09	0.0978581
AOA	MF.Thio5.II-480hi.PC	-1.13453e-09	1.30149e-09	0.808318
B-ALL	MF.Thio5.II-480hi.PC	2.08332e-10	1.12017e-09	0.426229
CD	MF.Thio5.II-480hi.PC	-7.20928e-09	3.86152e-08	0.57405
HT	MF.Thio5.II-480hi.PC	5.99497e-10	1.79198e-09	0.368985
IBD	MF.Thio5.II-480hi.PC	-6.15417e-09	9.54954e-09	0.740357
MS	MF.Thio5.II-480hi.PC	1.26185e-08	6.68716e-09	0.0295815
PBC	MF.Thio5.II-480hi.PC	-1.13928e-08	1.8068e-08	0.735833
RA	MF.Thio5.II-480hi.PC	-1.24672e-09	4.76481e-09	0.603205
AOA	MF.Thio5.II-480int.PC	-6.80998e-10	1.25127e-09	0.706864
B-ALL	MF.Thio5.II-480int.PC	-1.49551e-09	1.09958e-09	0.913096
CD	MF.Thio5.II-480int.PC	2.9692e-08	4.07872e-08	0.233315
HT	MF.Thio5.II-480int.PC	3.27015e-10	1.9096e-09	0.432015
IBD	MF.Thio5.II-480int.PC	2.49119e-09	9.807e-09	0.39974
MS	MF.Thio5.II-480int.PC	1.25052e-08	7.29018e-09	0.0431412
PBC	MF.Thio5.II-480int.PC	-1.87949e-08	2.03203e-08	0.8225
RA	MF.Thio5.II-480int.PC	-4.17629e-09	4.63704e-09	0.816109
AOA	MLP.BM	1.40439e-10	1.28711e-09	0.456557
B-ALL	MLP.BM	1.57661e-09	1.57236e-09	0.158002
CD	MLP.BM	1.02139e-08	4.10696e-08	0.401798
HT	MLP.BM	2.3974e-09	2.22721e-09	0.140871
IBD	MLP.BM	5.8065e-09	1.10188e-08	0.29911
MS	MLP.BM	-9.5889e-09	7.00628e-09	0.91444
PBC	MLP.BM	6.24531e-10	2.00435e-08	0.487571
RA	MLP.BM	5.58448e-09	4.91293e-09	0.127834
AOA	MLP.FL	-4.03845e-10	1.47652e-09	0.60777
B-ALL	MLP.FL	2.53576e-09	3.04334e-09	0.202362
CD	MLP.FL	-2.05914e-08	4.39277e-08	0.680379
HT	MLP.FL	2.56272e-09	3.31778e-09	0.219933
IBD	MLP.FL	-6.55028e-09	1.14349e-08	0.716621
MS	MLP.FL	-2.45568e-10	8.86557e-09	0.511049
PBC	MLP.FL	1.08084e-08	2.48227e-08	0.331627
RA	MLP.FL	2.60938e-09	5.47025e-09	0.316677
AOA	Mo.6+2-.BL	-1.37485e-09	1.21242e-09	0.871597
B-ALL	Mo.6+2-.BL	-8.81761e-10	1.09235e-09	0.79023
CD	Mo.6+2-.BL	7.51794e-10	3.62144e-08	0.491719
HT	Mo.6+2-.BL	4.1713e-10	1.67083e-09	0.401427
IBD	Mo.6+2-.BL	6.68027e-10	9.38193e-09	0.471618
MS	Mo.6+2-.BL	1.33799e-08	8.04405e-09	0.0481233
PBC	Mo.6+2-.BL	5.46958e-09	2.282e-08	0.405288
RA	Mo.6+2-.BL	1.20418e-09	4.0406e-09	0.382845
AOA	Mo.6+2+.BL	-2.52452e-09	1.47957e-09	0.95602
B-ALL	Mo.6+2+.BL	-6.63617e-10	1.16271e-09	0.715916
CD	Mo.6+2+.BL	1.44501e-08	4.29392e-08	0.368238
HT	Mo.6+2+.BL	1.78702e-09	1.86781e-09	0.169347
IBD	Mo.6+2+.BL	5.12653e-09	1.07444e-08	0.316632
MS	Mo.6+2+.BL	2.17696e-08	8.32296e-09	0.00445339
PBC	Mo.6+2+.BL	1.68635e-08	2.06988e-08	0.207619
RA	Mo.6+2+.BL	1.04124e-09	4.61486e-09	0.410746
AOA	Mo.6+2+.MLN	-5.89459e-10	1.302e-09	0.674629
B-ALL	Mo.6+2+.MLN	-1.77461e-09	1.06378e-09	0.952363
CD	Mo.6+2+.MLN	2.43524e-08	3.53122e-08	0.245213
HT	Mo.6+2+.MLN	-2.48192e-09	1.56145e-09	0.944026
IBD	Mo.6+2+.MLN	7.97642e-09	8.75727e-09	0.181191
MS	Mo.6+2+.MLN	1.70407e-08	7.15565e-09	0.00862259
PBC	Mo.6+2+.MLN	-1.05102e-08	1.69185e-08	0.732773
RA	Mo.6+2+.MLN	2.21825e-09	4.30264e-09	0.303083
AOA	Mo.6+2+.SLN	-1.66768e-09	1.18542e-09	0.920261
B-ALL	Mo.6+2+.SLN	-5.73454e-10	1.07101e-09	0.703825
CD	Mo.6+2+.SLN	5.36624e-08	3.87377e-08	0.0829839
HT	Mo.6+2+.SLN	-1.60426e-09	1.4165e-09	0.871298
IBD	Mo.6+2+.SLN	1.09892e-08	1.0101e-08	0.138311
MS	Mo.6+2+.SLN	1.30861e-08	7.22124e-09	0.0349801
PBC	Mo.6+2+.SLN	-6.82783e-09	1.61355e-08	0.663909
RA	Mo.6+2+.SLN	1.17057e-09	4.19026e-09	0.389986
AOA	Mo.6C+II-.Bl	-3.09116e-09	1.37398e-09	0.987769
B-ALL	Mo.6C+II-.Bl	8.15936e-10	1.205e-09	0.249163
CD	Mo.6C+II-.Bl	5.22011e-09	4.07096e-08	0.448984
HT	Mo.6C+II-.Bl	5.59322e-10	1.75885e-09	0.37524
IBD	Mo.6C+II-.Bl	8.30939e-09	1.07734e-08	0.220268
MS	Mo.6C+II-.Bl	1.3964e-08	7.2632e-09	0.0272674
PBC	Mo.6C+II-.Bl	7.56466e-09	2.21102e-08	0.366125
RA	Mo.6C+II-.Bl	2.63027e-09	4.92192e-09	0.296533
AOA	Mo.6C+II-.BM	4.68915e-10	1.44253e-09	0.372566
B-ALL	Mo.6C+II-.BM	9.23317e-10	1.24479e-09	0.229121
CD	Mo.6C+II-.BM	4.98336e-08	4.94686e-08	0.156877
HT	Mo.6C+II-.BM	-1.35552e-10	1.58565e-09	0.534063
IBD	Mo.6C+II-.BM	1.5679e-08	1.15813e-08	0.087897
MS	Mo.6C+II-.BM	8.28671e-09	9.65532e-09	0.195376
PBC	Mo.6C+II-.BM	-2.77491e-09	2.69012e-08	0.541079
RA	Mo.6C+II-.BM	1.24779e-08	5.61209e-09	0.0130945
AOA	Mo.6C+II-.LN	-1.64238e-09	1.2797e-09	0.900326
B-ALL	Mo.6C+II-.LN	-1.34574e-10	1.30024e-09	0.541217
CD	Mo.6C+II-.LN	1.0349e-07	4.30462e-08	0.00810503
HT	Mo.6C+II-.LN	-5.54525e-10	1.55605e-09	0.639217
IBD	Mo.6C+II-.LN	2.7967e-08	1.03018e-08	0.00331601
MS	Mo.6C+II-.LN	2.0034e-08	8.05484e-09	0.00643772
PBC	Mo.6C+II-.LN	3.12188e-09	2.3987e-08	0.448224
RA	Mo.6C+II-.LN	8.68958e-09	4.9275e-09	0.0389094
AOA	Mo.6C+II+.Bl	-3.33597e-09	1.43857e-09	0.989801
B-ALL	Mo.6C+II+.Bl	-4.17988e-10	1.20541e-09	0.635614
CD	Mo.6C+II+.Bl	1.47023e-08	3.95539e-08	0.355056
HT	Mo.6C+II+.Bl	5.10192e-10	1.8875e-09	0.393465
IBD	Mo.6C+II+.Bl	7.31765e-09	1.0473e-08	0.242365
MS	Mo.6C+II+.Bl	1.70577e-08	7.08025e-09	0.00799389
PBC	Mo.6C+II+.Bl	-1.6015e-08	2.03448e-08	0.784411
RA	Mo.6C+II+.Bl	1.59659e-09	4.68687e-09	0.366683
AOA	Mo.6C-II-.Bl	-1.64555e-09	1.43883e-09	0.87362
B-ALL	Mo.6C-II-.Bl	-5.92339e-10	1.20509e-09	0.688475
CD	Mo.6C-II-.Bl	2.41507e-08	4.67482e-08	0.302713
HT	Mo.6C-II-.Bl	1.23828e-09	2.04148e-09	0.272072
IBD	Mo.6C-II-.Bl	1.09162e-08	1.15907e-08	0.173144
MS	Mo.6C-II-.Bl	5.6569e-09	7.0678e-09	0.211746
PBC	Mo.6C-II-.Bl	-2.71975e-08	2.06928e-08	0.905635
RA	Mo.6C-II-.Bl	5.86848e-09	4.62489e-09	0.10224
AOA	Mo.6C-II-.BM	1.3065e-09	1.59341e-09	0.206126
B-ALL	Mo.6C-II-.BM	7.97889e-10	1.23048e-09	0.258352
CD	Mo.6C-II-.BM	3.72722e-08	3.95014e-08	0.172696
HT	Mo.6C-II-.BM	-1.71954e-09	1.60618e-09	0.85782
IBD	Mo.6C-II-.BM	1.17967e-08	1.09095e-08	0.139776
MS	Mo.6C-II-.BM	4.65933e-09	8.76329e-09	0.297471
PBC	Mo.6C-II-.BM	-1.3187e-08	2.99935e-08	0.66991
RA	Mo.6C-II-.BM	4.82539e-09	5.82034e-09	0.203536
AOA	Mo.6C-II+.Bl	-7.09614e-10	1.27811e-09	0.710624
B-ALL	Mo.6C-II+.Bl	6.86021e-10	1.10172e-09	0.266747
CD	Mo.6C-II+.Bl	-6.69057e-08	3.63062e-08	0.967322
HT	Mo.6C-II+.Bl	1.20784e-09	2.33144e-09	0.302206
IBD	Mo.6C-II+.Bl	-5.85145e-09	8.68143e-09	0.74985
MS	Mo.6C-II+.Bl	1.84266e-09	5.80305e-09	0.375419
PBC	Mo.6C-II+.Bl	-2.07796e-08	1.66569e-08	0.893895
RA	Mo.6C-II+.Bl	-1.71614e-09	4.61203e-09	0.645091
AOA	Mo.6C-IIint.Bl	-1.98788e-09	1.40595e-09	0.921304
B-ALL	Mo.6C-IIint.Bl	-4.59939e-10	1.21934e-09	0.646989
CD	Mo.6C-IIint.Bl	6.96877e-08	4.71831e-08	0.0698425
HT	Mo.6C-IIint.Bl	2.26423e-09	1.96283e-09	0.124341
IBD	Mo.6C-IIint.Bl	1.30815e-08	1.16095e-08	0.129915
MS	Mo.6C-IIint.Bl	8.98036e-09	7.89213e-09	0.127584
PBC	Mo.6C-IIint.Bl	7.26488e-09	2.27007e-08	0.374473
RA	Mo.6C-IIint.Bl	7.35436e-09	4.60114e-09	0.0549796
AOA	Mo.Lu	-2.72239e-09	1.41082e-09	0.973175
B-ALL	Mo.Lu	-8.59852e-10	1.13522e-09	0.775605
CD	Mo.Lu	5.4284e-08	4.34031e-08	0.105523
HT	Mo.Lu	8.16637e-10	1.83479e-09	0.328129
IBD	Mo.Lu	5.13893e-09	1.12422e-08	0.323796
MS	Mo.Lu	1.65635e-08	7.87516e-09	0.0177218
PBC	Mo.Lu	-1.50411e-08	2.02379e-08	0.771325
RA	Mo.Lu	1.44213e-09	4.43785e-09	0.372605
AOA	NK.49CI-.Sp	1.80321e-09	1.42988e-09	0.103639
B-ALL	NK.49CI-.Sp	-1.55182e-10	1.04008e-09	0.559302
CD	NK.49CI-.Sp	6.67367e-08	3.89392e-08	0.0432762
HT	NK.49CI-.Sp	4.84677e-10	1.50221e-09	0.373482
IBD	NK.49CI-.Sp	1.23805e-08	9.50559e-09	0.0963832
MS	NK.49CI-.Sp	1.50626e-08	7.16611e-09	0.01778
PBC	NK.49CI-.Sp	4.9385e-08	2.27852e-08	0.0151015
RA	NK.49CI-.Sp	6.90633e-09	4.69458e-09	0.0706283
AOA	NK.49CI+.Sp	2.08121e-09	1.48314e-09	0.0802722
B-ALL	NK.49CI+.Sp	7.01429e-10	1.1811e-09	0.276298
CD	NK.49CI+.Sp	2.26852e-08	3.72444e-08	0.271232
HT	NK.49CI+.Sp	2.79424e-11	1.56096e-09	0.492859
IBD	NK.49CI+.Sp	5.08265e-09	9.90469e-09	0.303921
MS	NK.49CI+.Sp	3.50304e-09	7.11969e-09	0.311352
PBC	NK.49CI+.Sp	1.00584e-08	2.44176e-08	0.340195
RA	NK.49CI+.Sp	5.5033e-09	5.36876e-09	0.152667
AOA	NK.49H-.Sp	2.56675e-09	1.70095e-09	0.0656482
B-ALL	NK.49H-.Sp	1.1603e-09	1.16304e-09	0.159226
CD	NK.49H-.Sp	1.3611e-07	5.29529e-08	0.00507913
HT	NK.49H-.Sp	3.88401e-10	1.70324e-09	0.409809
IBD	NK.49H-.Sp	3.42796e-08	1.19779e-08	0.00210551
MS	NK.49H-.Sp	1.50573e-08	8.97091e-09	0.0466287
PBC	NK.49H-.Sp	1.90172e-08	2.53204e-08	0.226307
RA	NK.49H-.Sp	4.5909e-09	5.69598e-09	0.210124
AOA	NK.49H+.Sp	1.98497e-09	1.83533e-09	0.13973
B-ALL	NK.49H+.Sp	-6.22239e-10	1.31336e-09	0.682171
CD	NK.49H+.Sp	1.16103e-07	5.49643e-08	0.0173284
HT	NK.49H+.Sp	4.34437e-10	1.69406e-09	0.398803
IBD	NK.49H+.Sp	3.06656e-08	1.20635e-08	0.00551076
MS	NK.49H+.Sp	8.71623e-09	8.68649e-09	0.157828
PBC	NK.49H+.Sp	2.2463e-08	2.48006e-08	0.182535
RA	NK.49H+.Sp	5.91419e-09	5.22477e-09	0.128827
AOA	NK.b2m-.Sp	2.81347e-09	1.63038e-09	0.0422053
B-ALL	NK.b2m-.Sp	3.54843e-10	1.08319e-09	0.37161
CD	NK.b2m-.Sp	1.16829e-07	4.05615e-08	0.0019866
HT	NK.b2m-.Sp	2.69733e-09	2.41084e-09	0.131605
IBD	NK.b2m-.Sp	2.62661e-08	9.39443e-09	0.00258759
MS	NK.b2m-.Sp	1.81119e-08	7.7156e-09	0.0094515
PBC	NK.b2m-.Sp	4.9759e-08	2.71108e-08	0.0332235
RA	NK.b2m-.Sp	1.03336e-08	5.0217e-09	0.0198054
AOA	NK.CD127-.SI	2.02196e-09	1.48409e-09	0.0865322
B-ALL	NK.CD127-.SI	-1.79027e-09	1.09417e-09	0.9491
CD	NK.CD127-.SI	-2.66963e-09	4.39832e-08	0.5242
HT	NK.CD127-.SI	-8.25315e-10	2.02589e-09	0.658137
IBD	NK.CD127-.SI	-2.33554e-10	1.06384e-08	0.508758
MS	NK.CD127-.SI	-2.21569e-09	6.59136e-09	0.631622
PBC	NK.CD127-.SI	2.42489e-08	2.12246e-08	0.126626
RA	NK.CD127-.SI	6.65636e-09	4.67862e-09	0.0774088
AOA	NK.CD127-.Sp	5.58294e-10	1.45688e-09	0.350781
B-ALL	NK.CD127-.Sp	-1.34944e-09	9.82715e-10	0.915152
CD	NK.CD127-.Sp	-1.16403e-08	4.019e-08	0.613951
HT	NK.CD127-.Sp	-2.11147e-09	1.21212e-09	0.959242
IBD	NK.CD127-.Sp	5.50165e-10	1.01141e-08	0.47831
MS	NK.CD127-.Sp	-3.27786e-09	5.46067e-09	0.725836
PBC	NK.CD127-.Sp	1.21184e-08	1.7946e-08	0.249751
RA	NK.CD127-.Sp	-2.84891e-09	4.05079e-09	0.759065
AOA	NK.CD49b+.Lv	-1.07834e-09	1.45077e-09	0.771346
B-ALL	NK.CD49b+.Lv	-1.31607e-09	1.06167e-09	0.892443
CD	NK.CD49b+.Lv	-2.33631e-08	3.79251e-08	0.731064
HT	NK.CD49b+.Lv	-3.5291e-09	1.44343e-09	0.992756
IBD	NK.CD49b+.Lv	-3.76453e-09	1.03075e-08	0.642527
MS	NK.CD49b+.Lv	-1.42661e-09	6.0985e-09	0.592479
PBC	NK.CD49b+.Lv	2.32951e-08	1.84267e-08	0.103079
RA	NK.CD49b+.Lv	-1.92005e-09	4.2445e-09	0.674495
AOA	NK.DAP10-.Sp	2.85288e-10	1.54269e-09	0.426642
B-ALL	NK.DAP10-.Sp	1.5279e-09	1.33596e-09	0.12638
CD	NK.DAP10-.Sp	1.09394e-07	4.81745e-08	0.0115797
HT	NK.DAP10-.Sp	5.17134e-09	3.14338e-09	0.0499693
IBD	NK.DAP10-.Sp	1.69072e-08	1.08523e-08	0.0596243
MS	NK.DAP10-.Sp	1.03221e-08	7.66999e-09	0.0891882
PBC	NK.DAP10-.Sp	3.97131e-08	2.46978e-08	0.0539217
RA	NK.DAP10-.Sp	8.54736e-09	4.83332e-09	0.0384951
AOA	NK.DAP12-.Sp	1.6178e-09	1.44217e-09	0.130977
B-ALL	NK.DAP12-.Sp	1.60078e-09	1.18257e-09	0.0879251
CD	NK.DAP12-.Sp	8.57614e-08	4.32791e-08	0.0237625
HT	NK.DAP12-.Sp	1.04791e-09	1.47369e-09	0.238518
IBD	NK.DAP12-.Sp	2.32791e-08	1.06794e-08	0.0146358
MS	NK.DAP12-.Sp	8.98207e-09	6.73249e-09	0.0910795
PBC	NK.DAP12-.Sp	1.3214e-08	2.3802e-08	0.289392
RA	NK.DAP12-.Sp	2.31418e-09	4.44889e-09	0.301472
AOA	NK.H+.MCMV1.Sp	2.49789e-10	1.86427e-09	0.446706
B-ALL	NK.H+.MCMV1.Sp	9.75197e-10	1.5599e-09	0.265931
CD	NK.H+.MCMV1.Sp	1.00367e-07	5.13956e-08	0.0254195
HT	NK.H+.MCMV1.Sp	2.33327e-09	1.95329e-09	0.116135
IBD	NK.H+.MCMV1.Sp	2.34484e-08	1.29122e-08	0.0346867
MS	NK.H+.MCMV1.Sp	1.58774e-08	7.58553e-09	0.0181693
PBC	NK.H+.MCMV1.Sp	2.15084e-08	2.25076e-08	0.169636
RA	NK.H+.MCMV1.Sp	1.65597e-09	5.13683e-09	0.373586
AOA	NK.MCMV1.Sp	-1.23264e-09	1.72115e-09	0.763058
B-ALL	NK.MCMV1.Sp	2.0968e-09	1.49288e-09	0.0800804
CD	NK.MCMV1.Sp	7.0218e-08	4.3195e-08	0.052017
HT	NK.MCMV1.Sp	3.95601e-09	1.81272e-09	0.0145415
IBD	NK.MCMV1.Sp	1.2343e-08	1.08424e-08	0.127476
MS	NK.MCMV1.Sp	1.82185e-08	7.48079e-09	0.00743826
PBC	NK.MCMV1.Sp	4.37411e-08	1.99033e-08	0.0139861
RA	NK.MCMV1.Sp	1.18894e-08	5.22361e-09	0.0114205
AOA	NK.MCMV7.Sp	1.77716e-09	1.56098e-09	0.127457
B-ALL	NK.MCMV7.Sp	8.71534e-10	1.19338e-09	0.232602
CD	NK.MCMV7.Sp	1.04578e-07	4.60586e-08	0.0115875
HT	NK.MCMV7.Sp	6.75557e-10	1.61471e-09	0.337835
IBD	NK.MCMV7.Sp	9.00791e-09	1.08987e-08	0.204256
MS	NK.MCMV7.Sp	1.39002e-08	7.45927e-09	0.0311975
PBC	NK.MCMV7.Sp	2.1494e-08	2.43266e-08	0.188467
RA	NK.MCMV7.Sp	9.01972e-09	4.9605e-09	0.0345084
AOA	NK.Sp	1.65241e-10	1.55798e-09	0.457767
B-ALL	NK.Sp	7.05405e-10	1.35452e-09	0.301261
CD	NK.Sp	8.48521e-08	3.91519e-08	0.0151077
HT	NK.Sp	3.66227e-09	2.67319e-09	0.0853437
IBD	NK.Sp	1.75498e-08	9.69984e-09	0.035203
MS	NK.Sp	8.49521e-09	8.29225e-09	0.152805
PBC	NK.Sp	1.15e-08	2.3134e-08	0.309558
RA	NK.Sp	4.78903e-09	4.62065e-09	0.149998
AOA	NKT.4-.Lv	2.80321e-09	1.49866e-09	0.0307091
B-ALL	NKT.4-.Lv	4.32748e-10	1.28399e-09	0.368045
CD	NKT.4-.Lv	1.8247e-07	5.37656e-08	0.000344641
HT	NKT.4-.Lv	4.60412e-09	2.18051e-09	0.0173652
IBD	NKT.4-.Lv	4.03611e-08	1.35246e-08	0.0014213
MS	NKT.4-.Lv	1.62972e-08	7.46855e-09	0.0145507
PBC	NKT.4-.Lv	2.29533e-08	1.94753e-08	0.119282
RA	NKT.4-.Lv	1.07255e-08	5.11321e-09	0.0179703
AOA	NKT.4-.Sp	3.83279e-09	1.57899e-09	0.00760428
B-ALL	NKT.4-.Sp	1.0103e-09	1.15732e-09	0.191341
CD	NKT.4-.Sp	1.54918e-07	5.04109e-08	0.00105921
HT	NKT.4-.Sp	4.03966e-09	2.05348e-09	0.0245784
IBD	NKT.4-.Sp	3.30288e-08	1.26542e-08	0.00452584
MS	NKT.4-.Sp	6.60188e-09	7.72207e-09	0.196293
PBC	NKT.4-.Sp	8.57556e-09	2.44458e-08	0.36287
RA	NKT.4-.Sp	1.09477e-08	5.23323e-09	0.0182208
AOA	NKT.4+.Lv	2.99132e-09	1.4924e-09	0.0225153
B-ALL	NKT.4+.Lv	1.15017e-09	1.16376e-09	0.161498
CD	NKT.4+.Lv	1.31447e-07	4.8771e-08	0.00351753
HT	NKT.4+.Lv	3.60218e-09	2.03699e-09	0.0384982
IBD	NKT.4+.Lv	3.01974e-08	1.21419e-08	0.00644046
MS	NKT.4+.Lv	1.61614e-08	8.42135e-09	0.0274858
PBC	NKT.4+.Lv	1.71276e-08	2.33053e-08	0.231193
RA	NKT.4+.Lv	1.58976e-08	5.39426e-09	0.00160365
AOA	NKT.4+.Sp	2.96554e-09	1.82648e-09	0.0522264
B-ALL	NKT.4+.Sp	5.1467e-10	1.32679e-09	0.349043
CD	NKT.4+.Sp	2.21375e-09	4.79241e-08	0.481578
HT	NKT.4+.Sp	7.36842e-09	3.44126e-09	0.016129
IBD	NKT.4+.Sp	6.40854e-09	1.23233e-08	0.30152
MS	NKT.4+.Sp	4.04003e-09	8.62609e-09	0.319767
PBC	NKT.4+.Sp	3.48765e-08	2.63643e-08	0.0929397
RA	NKT.4+.Sp	1.43246e-08	6.31599e-09	0.0116651
AOA	NKT.44+NK1.1+.Th	1.74559e-09	1.70711e-09	0.153263
B-ALL	NKT.44+NK1.1+.Th	3.4903e-10	1.23734e-09	0.38894
CD	NKT.44+NK1.1+.Th	1.39846e-07	5.30726e-08	0.00420687
HT	NKT.44+NK1.1+.Th	3.05865e-09	1.63559e-09	0.0307377
IBD	NKT.44+NK1.1+.Th	3.11995e-08	1.26684e-08	0.0068932
MS	NKT.44+NK1.1+.Th	1.32231e-08	8.04222e-09	0.0500662
PBC	NKT.44+NK1.1+.Th	3.43913e-08	2.06474e-08	0.0478915
RA	NKT.44+NK1.1+.Th	1.14604e-08	5.14539e-09	0.0129635
AOA	preT.DN2A.Th	1.00239e-09	1.71855e-09	0.279853
B-ALL	preT.DN2A.Th	3.36952e-09	2.06579e-09	0.0514337
CD	preT.DN2A.Th	2.56585e-08	5.2189e-08	0.311485
HT	preT.DN2A.Th	5.61466e-09	3.71632e-09	0.0654181
IBD	preT.DN2A.Th	1.08486e-08	1.35771e-08	0.212134
MS	preT.DN2A.Th	6.06216e-09	8.71484e-09	0.243336
PBC	preT.DN2A.Th	1.64937e-08	2.64718e-08	0.26662
RA	preT.DN2A.Th	1.09093e-08	6.46687e-09	0.0458061
AOA	preT.DN3-4.Th	8.7045e-12	1.56155e-09	0.497776
B-ALL	preT.DN3-4.Th	3.13991e-09	2.20143e-09	0.0768903
CD	preT.DN3-4.Th	4.28167e-08	5.35804e-08	0.212113
HT	preT.DN3-4.Th	3.45165e-09	2.39309e-09	0.0746038
IBD	preT.DN3-4.Th	7.22294e-09	1.36423e-08	0.298246
MS	preT.DN3-4.Th	2.82677e-09	8.15294e-09	0.364401
PBC	preT.DN3-4.Th	-7.70462e-09	2.37441e-08	0.627215
RA	preT.DN3-4.Th	1.60677e-09	5.74487e-09	0.389859
AOA	preT.DN3A.Th	-5.8393e-10	1.48683e-09	0.652742
B-ALL	preT.DN3A.Th	7.10899e-10	1.29416e-09	0.291395
CD	preT.DN3A.Th	4.32314e-08	4.86684e-08	0.187194
HT	preT.DN3A.Th	5.75298e-09	3.8902e-09	0.0695917
IBD	preT.DN3A.Th	1.1642e-09	1.16912e-08	0.460339
MS	preT.DN3A.Th	-1.95053e-09	8.05313e-09	0.59569
PBC	preT.DN3A.Th	2.31301e-08	2.46832e-08	0.174359
RA	preT.DN3A.Th	1.93412e-08	8.13653e-09	0.00872503
AOA	preT.DN3B.Th	5.27774e-10	1.6883e-09	0.377289
B-ALL	preT.DN3B.Th	3.46231e-09	2.28096e-09	0.0645172
CD	preT.DN3B.Th	6.372e-08	5.32432e-08	0.115698
HT	preT.DN3B.Th	6.33704e-09	3.18345e-09	0.0232612
IBD	preT.DN3B.Th	1.78595e-08	1.32558e-08	0.0889427
MS	preT.DN3B.Th	3.51064e-10	8.36111e-09	0.483254
PBC	preT.DN3B.Th	7.63547e-09	2.72088e-08	0.389499
RA	preT.DN3B.Th	7.74829e-09	7.79356e-09	0.160065
AOA	preT.ETP.Th	2.59228e-09	2.66765e-09	0.165589
B-ALL	preT.ETP.Th	2.39505e-09	1.82117e-09	0.0942355
CD	preT.ETP.Th	1.95093e-08	4.93888e-08	0.346416
HT	preT.ETP.Th	2.35594e-09	3.39655e-09	0.243958
IBD	preT.ETP.Th	1.18654e-09	1.17006e-08	0.459613
MS	preT.ETP.Th	-9.79033e-09	8.12432e-09	0.885911
PBC	preT.ETP.Th	2.98236e-08	2.49048e-08	0.115555
RA	preT.ETP.Th	1.01053e-08	6.07888e-09	0.0482202
AOA	preT.ETP-2A.Th	2.12544e-09	2.50838e-09	0.198404
B-ALL	preT.ETP-2A.Th	7.04951e-10	1.12589e-09	0.265616
CD	preT.ETP-2A.Th	2.12898e-08	4.59367e-08	0.321517
HT	preT.ETP-2A.Th	1.91045e-09	3.29607e-09	0.281088
IBD	preT.ETP-2A.Th	1.83029e-10	1.0117e-08	0.492783
MS	preT.ETP-2A.Th	7.22724e-09	7.69008e-09	0.173657
PBC	preT.ETP-2A.Th	3.21168e-08	2.18928e-08	0.0711875
RA	preT.ETP-2A.Th	1.22313e-08	5.70978e-09	0.0160903
AOA	proB.CLP.FL	1.46584e-10	1.54239e-09	0.462143
B-ALL	proB.CLP.FL	2.27984e-09	1.80948e-09	0.103846
CD	proB.CLP.FL	7.758e-09	4.28331e-08	0.428136
HT	proB.CLP.FL	4.1395e-09	3.26075e-09	0.102133
IBD	proB.CLP.FL	6.85269e-09	1.15176e-08	0.27593
MS	proB.CLP.FL	7.16653e-09	8.17576e-09	0.190363
PBC	proB.CLP.FL	2.05204e-08	2.36969e-08	0.193258
RA	proB.CLP.FL	3.38323e-09	5.49028e-09	0.268874
AOA	proB.FrA.FL	2.99657e-10	1.32816e-09	0.41075
B-ALL	proB.FrA.FL	2.33621e-09	1.78014e-09	0.0946974
CD	proB.FrA.FL	-4.87918e-08	4.21327e-08	0.876578
HT	proB.FrA.FL	3.39532e-09	2.15531e-09	0.0575901
IBD	proB.FrA.FL	-3.4356e-09	1.10613e-08	0.621946
MS	proB.FrA.FL	1.22315e-09	7.62885e-09	0.43631
PBC	proB.FrA.FL	9.38325e-09	2.37245e-08	0.346234
RA	proB.FrA.FL	1.00492e-09	5.40929e-09	0.42631
AOA	proB.FrBC.FL	-1.23713e-09	1.4962e-09	0.795838
B-ALL	proB.FrBC.FL	2.5407e-09	2.11264e-09	0.114561
CD	proB.FrBC.FL	-3.09078e-08	4.4385e-08	0.756897
HT	proB.FrBC.FL	2.47476e-09	2.06552e-09	0.115433
IBD	proB.FrBC.FL	1.68819e-10	1.21325e-08	0.494449
MS	proB.FrBC.FL	3.38002e-09	8.6084e-09	0.347292
PBC	proB.FrBC.FL	1.90609e-08	2.95178e-08	0.259223
RA	proB.FrBC.FL	3.23021e-09	5.22213e-09	0.268103
AOA	SC.CDP.BM	-1.9073e-09	1.55992e-09	0.889277
B-ALL	SC.CDP.BM	2.71408e-09	1.94803e-09	0.0817735
CD	SC.CDP.BM	-1.69315e-08	5.12078e-08	0.629543
HT	SC.CDP.BM	1.44786e-09	2.10488e-09	0.245771
IBD	SC.CDP.BM	-1.30515e-08	1.29648e-08	0.842957
MS	SC.CDP.BM	-1.48359e-08	8.79505e-09	0.954184
PBC	SC.CDP.BM	6.17076e-09	3.20242e-08	0.423601
RA	SC.CDP.BM	8.02354e-10	5.46088e-09	0.441595
AOA	SC.CMP.BM.DR	-4.22673e-10	1.24056e-09	0.63334
B-ALL	SC.CMP.BM.DR	2.26982e-09	2.51986e-09	0.183854
CD	SC.CMP.BM.DR	4.52092e-08	4.33165e-08	0.148313
HT	SC.CMP.BM.DR	1.2816e-09	2.80542e-09	0.323897
IBD	SC.CMP.BM.DR	7.74407e-09	1.08101e-08	0.236881
MS	SC.CMP.BM.DR	1.71801e-09	7.72956e-09	0.412054
PBC	SC.CMP.BM.DR	-2.0225e-08	2.09168e-08	0.833209
RA	SC.CMP.BM.DR	-2.60188e-09	4.32966e-09	0.726061
AOA	SC.GMP.BM	-1.73263e-09	1.56179e-09	0.866368
B-ALL	SC.GMP.BM	-6.93589e-10	1.41997e-09	0.687385
CD	SC.GMP.BM	5.92394e-08	5.68539e-08	0.148715
HT	SC.GMP.BM	-1.9805e-09	1.69052e-09	0.879308
IBD	SC.GMP.BM	-5.85016e-09	1.42207e-08	0.659604
MS	SC.GMP.BM	-7.80181e-09	1.01477e-08	0.779002
PBC	SC.GMP.BM	-2.80193e-08	3.05315e-08	0.820617
RA	SC.GMP.BM	-7.68995e-09	6.04036e-09	0.898508
AOA	SC.LT34F.BM	8.75012e-10	1.23362e-09	0.239068
B-ALL	SC.LT34F.BM	1.00237e-09	1.938e-09	0.302502
CD	SC.LT34F.BM	-7.36825e-08	3.62721e-08	0.978892
HT	SC.LT34F.BM	5.87205e-10	2.367e-09	0.402036
IBD	SC.LT34F.BM	-2.72846e-08	9.18928e-09	0.998507
MS	SC.LT34F.BM	2.88191e-09	6.15744e-09	0.319879
PBC	SC.LT34F.BM	-3.58791e-09	1.67523e-08	0.584794
RA	SC.LT34F.BM	3.10092e-09	4.77267e-09	0.257935
AOA	SC.LTSL.FL	-2.8816e-10	1.12845e-09	0.600777
B-ALL	SC.LTSL.FL	1.6042e-09	2.18182e-09	0.231091
CD	SC.LTSL.FL	-1.04114e-07	3.95421e-08	0.995768
HT	SC.LTSL.FL	2.90429e-09	2.90066e-09	0.158353
IBD	SC.LTSL.FL	-2.28658e-08	9.73047e-09	0.990611
MS	SC.LTSL.FL	6.73774e-10	6.49106e-09	0.458664
PBC	SC.LTSL.FL	-1.66624e-08	1.90426e-08	0.809214
RA	SC.LTSL.FL	-2.3727e-09	4.47351e-09	0.702079
AOA	SC.MDP.BM	-5.42144e-10	1.43357e-09	0.647351
B-ALL	SC.MDP.BM	1.85278e-09	2.05936e-09	0.184144
CD	SC.MDP.BM	2.43459e-08	5.25174e-08	0.321475
HT	SC.MDP.BM	3.35978e-09	3.00215e-09	0.131544
IBD	SC.MDP.BM	9.65355e-09	1.42423e-08	0.248947
MS	SC.MDP.BM	-7.19425e-09	9.23116e-09	0.782111
PBC	SC.MDP.BM	3.61814e-09	2.73983e-08	0.44747
RA	SC.MDP.BM	-2.31798e-09	5.58444e-09	0.660957
AOA	SC.MEP.BM	4.6527e-10	1.5707e-09	0.383532
B-ALL	SC.MEP.BM	1.01411e-09	3.06088e-09	0.370204
CD	SC.MEP.BM	-1.3418e-09	4.61361e-08	0.511601
HT	SC.MEP.BM	3.0178e-10	2.91056e-09	0.45871
IBD	SC.MEP.BM	7.02402e-09	1.22243e-08	0.282782
MS	SC.MEP.BM	-5.11083e-09	8.58409e-09	0.724207
PBC	SC.MEP.BM	1.41488e-08	2.21488e-08	0.261474
RA	SC.MEP.BM	-7.00356e-09	5.15875e-09	0.912706
AOA	SC.MPP34F.BM	2.28434e-09	1.35862e-09	0.0463457
B-ALL	SC.MPP34F.BM	1.58645e-09	1.61725e-09	0.163308
CD	SC.MPP34F.BM	3.41408e-08	4.33433e-08	0.215441
HT	SC.MPP34F.BM	3.73129e-09	2.76449e-09	0.0885525
IBD	SC.MPP34F.BM	4.81659e-09	1.12569e-08	0.33437
MS	SC.MPP34F.BM	5.70368e-10	7.80475e-09	0.470871
PBC	SC.MPP34F.BM	-8.20827e-09	2.16884e-08	0.647457
RA	SC.MPP34F.BM	-1.3042e-09	4.19194e-09	0.622146
AOA	SC.ST34F.BM	9.18031e-10	1.25763e-09	0.232704
B-ALL	SC.ST34F.BM	2.29933e-09	2.3062e-09	0.159377
CD	SC.ST34F.BM	3.56075e-09	4.24847e-08	0.466603
HT	SC.ST34F.BM	1.02229e-09	2.36203e-09	0.33258
IBD	SC.ST34F.BM	-4.27095e-09	1.05112e-08	0.657747
MS	SC.ST34F.BM	3.54768e-10	7.3453e-09	0.480739
PBC	SC.ST34F.BM	-2.62628e-08	1.98207e-08	0.907418
RA	SC.ST34F.BM	-3.01001e-09	4.4245e-09	0.751844
AOA	SC.STSL.BM	1.89389e-09	1.15694e-09	0.0508162
B-ALL	SC.STSL.BM	1.04799e-09	1.22133e-09	0.195427
CD	SC.STSL.BM	1.28751e-08	3.74019e-08	0.365334
HT	SC.STSL.BM	4.5194e-09	2.44369e-09	0.032199
IBD	SC.STSL.BM	-2.12746e-09	9.67415e-09	0.58703
MS	SC.STSL.BM	1.94707e-09	6.42213e-09	0.380876
PBC	SC.STSL.BM	5.67851e-09	1.6927e-08	0.368635
RA	SC.STSL.BM	7.37792e-09	5.03869e-09	0.0715626
AOA	SC.STSL.FL	4.84016e-10	1.18345e-09	0.341274
B-ALL	SC.STSL.FL	2.0249e-09	2.18479e-09	0.17701
CD	SC.STSL.FL	-5.74393e-08	3.66088e-08	0.941676
HT	SC.STSL.FL	3.93512e-09	2.57878e-09	0.0635099
IBD	SC.STSL.FL	-3.98466e-09	9.43349e-09	0.663632
MS	SC.STSL.FL	-3.04476e-09	6.12534e-09	0.690432
PBC	SC.STSL.FL	-2.16634e-08	1.82141e-08	0.882853
RA	SC.STSL.FL	1.99138e-10	4.26571e-09	0.481383
AOA	St.31-38-44-.SLN	6.61313e-10	1.22226e-09	0.294234
B-ALL	St.31-38-44-.SLN	3.71549e-10	1.09229e-09	0.36687
CD	St.31-38-44-.SLN	-4.38379e-08	3.49286e-08	0.895274
HT	St.31-38-44-.SLN	-1.80705e-09	1.39955e-09	0.901677
IBD	St.31-38-44-.SLN	-6.35416e-09	8.66784e-09	0.768243
MS	St.31-38-44-.SLN	-2.83539e-09	5.64312e-09	0.692325
PBC	St.31-38-44-.SLN	-2.10324e-08	1.21853e-08	0.957831
RA	St.31-38-44-.SLN	-7.67873e-09	3.32601e-09	0.98952
AOA	T.4.PLN.BDC	-3.82611e-10	1.49594e-09	0.600934
B-ALL	T.4.PLN.BDC	1.85759e-09	1.54803e-09	0.115075
CD	T.4.PLN.BDC	7.27035e-08	4.72349e-08	0.061879
HT	T.4.PLN.BDC	8.23577e-09	4.41991e-09	0.0312076
IBD	T.4.PLN.BDC	2.28456e-08	1.26354e-08	0.035299
MS	T.4.PLN.BDC	1.34765e-08	9.06385e-09	0.0685278
PBC	T.4.PLN.BDC	3.70904e-08	2.60413e-08	0.0771811
RA	T.4.PLN.BDC	2.4887e-08	7.24512e-09	0.000296268
AOA	T.4+8int.Th	1.57462e-09	1.37677e-09	0.126373
B-ALL	T.4+8int.Th	1.88529e-09	1.31055e-09	0.0751399
CD	T.4+8int.Th	2.10714e-08	4.54006e-08	0.321281
HT	T.4+8int.Th	4.86453e-09	2.24457e-09	0.0151083
IBD	T.4+8int.Th	9.9897e-09	1.13037e-08	0.188415
MS	T.4+8int.Th	9.39705e-09	7.61705e-09	0.10866
PBC	T.4+8int.Th	2.57839e-08	1.93041e-08	0.0908283
RA	T.4+8int.Th	1.00578e-08	5.18843e-09	0.0262808
AOA	T.4Eff49d+11a+.Sp.d8.LCMV	3.07756e-10	1.93116e-09	0.436691
B-ALL	T.4Eff49d+11a+.Sp.d8.LCMV	-7.10375e-12	1.20653e-09	0.502349
CD	T.4Eff49d+11a+.Sp.d8.LCMV	-3.5492e-08	4.98843e-08	0.761609
HT	T.4Eff49d+11a+.Sp.d8.LCMV	3.09439e-09	2.23643e-09	0.0832362
IBD	T.4Eff49d+11a+.Sp.d8.LCMV	-4.92608e-09	1.29497e-08	0.648177
MS	T.4Eff49d+11a+.Sp.d8.LCMV	1.3595e-08	8.5925e-09	0.0568026
PBC	T.4Eff49d+11a+.Sp.d8.LCMV	1.76785e-08	2.52334e-08	0.241776
RA	T.4Eff49d+11a+.Sp.d8.LCMV	7.33093e-09	5.47815e-09	0.0904133
AOA	T.4FP3-.Sp	1.22623e-10	1.19078e-09	0.458991
B-ALL	T.4FP3-.Sp	1.93584e-09	1.39232e-09	0.0822072
CD	T.4FP3-.Sp	8.76646e-08	4.76142e-08	0.0328003
HT	T.4FP3-.Sp	6.42368e-09	3.46588e-09	0.031912
IBD	T.4FP3-.Sp	2.20379e-08	1.26978e-08	0.0413195
MS	T.4FP3-.Sp	1.19371e-08	7.98118e-09	0.0673718
PBC	T.4FP3-.Sp	3.20684e-08	2.49764e-08	0.0995798
RA	T.4FP3-.Sp	1.95676e-08	6.53413e-09	0.00137371
AOA	T.4FP3+25+.Sp	1.3462e-09	1.35496e-09	0.160225
B-ALL	T.4FP3+25+.Sp	7.89315e-10	1.21613e-09	0.258157
CD	T.4FP3+25+.Sp	1.01486e-07	4.14533e-08	0.00717852
HT	T.4FP3+25+.Sp	7.78775e-09	3.4315e-09	0.0116195
IBD	T.4FP3+25+.Sp	2.67404e-08	1.04728e-08	0.00533492
MS	T.4FP3+25+.Sp	1.13281e-08	6.94002e-09	0.0513096
PBC	T.4FP3+25+.Sp	6.53316e-08	2.15266e-08	0.00120297
RA	T.4FP3+25+.Sp	1.81189e-08	6.29792e-09	0.0020076
AOA	T.4Mem.LN	1.10557e-10	1.32617e-09	0.46678
B-ALL	T.4Mem.LN	1.75883e-09	1.27066e-09	0.0831504
CD	T.4Mem.LN	1.14869e-07	5.21063e-08	0.0137439
HT	T.4Mem.LN	6.93888e-09	3.51852e-09	0.0242991
IBD	T.4Mem.LN	2.97114e-08	1.27255e-08	0.00977733
MS	T.4Mem.LN	1.08427e-08	7.66645e-09	0.0786364
PBC	T.4Mem.LN	4.60546e-08	2.45647e-08	0.0304084
RA	T.4Mem.LN	2.11929e-08	5.36302e-09	3.88021e-05
AOA	T.4Mem.Sp	2.92543e-09	1.59312e-09	0.033157
B-ALL	T.4Mem.Sp	1.68545e-09	1.14178e-09	0.0699507
CD	T.4Mem.Sp	1.61494e-07	5.25815e-08	0.00106562
HT	T.4Mem.Sp	6.69034e-09	2.07427e-09	0.000628983
IBD	T.4Mem.Sp	3.71044e-08	1.31957e-08	0.00246289
MS	T.4Mem.Sp	1.41987e-08	8.27148e-09	0.0430275
PBC	T.4Mem.Sp	4.65729e-08	2.49842e-08	0.0311539
RA	T.4Mem.Sp	1.29297e-08	5.92718e-09	0.0145757
AOA	T.4Mem44h62l.Sp	1.43955e-09	1.73018e-09	0.202698
B-ALL	T.4Mem44h62l.Sp	1.45847e-09	1.25089e-09	0.121818
CD	T.4Mem44h62l.Sp	1.47631e-07	5.17738e-08	0.00217596
HT	T.4Mem44h62l.Sp	4.52178e-09	1.7492e-09	0.00486823
IBD	T.4Mem44h62l.Sp	3.08513e-08	1.22394e-08	0.00585697
MS	T.4Mem44h62l.Sp	1.8497e-08	8.0075e-09	0.010445
PBC	T.4Mem44h62l.Sp	5.09318e-08	2.39731e-08	0.0168124
RA	T.4Mem44h62l.Sp	1.64933e-08	5.44486e-09	0.0012262
AOA	T.4Mem49d+11a+.Sp.d30.LCMV	1.61797e-09	1.69345e-09	0.169681
B-ALL	T.4Mem49d+11a+.Sp.d30.LCMV	1.47954e-09	1.2375e-09	0.11593
CD	T.4Mem49d+11a+.Sp.d30.LCMV	-2.2276e-09	4.32344e-08	0.520546
HT	T.4Mem49d+11a+.Sp.d30.LCMV	9.36797e-10	1.96664e-09	0.316915
IBD	T.4Mem49d+11a+.Sp.d30.LCMV	-1.08437e-09	1.17873e-08	0.536649
MS	T.4Mem49d+11a+.Sp.d30.LCMV	6.68259e-09	7.36047e-09	0.181965
PBC	T.4Mem49d+11a+.Sp.d30.LCMV	-1.03334e-08	2.10301e-08	0.688416
RA	T.4Mem49d+11a+.Sp.d30.LCMV	4.69268e-09	5.53478e-09	0.19826
AOA	T.4Nve.MLN	-7.02481e-10	1.28141e-09	0.708226
B-ALL	T.4Nve.MLN	1.98464e-09	1.42484e-09	0.0818271
CD	T.4Nve.MLN	8.10838e-08	4.75953e-08	0.044227
HT	T.4Nve.MLN	4.02209e-09	3.05586e-09	0.0940555
IBD	T.4Nve.MLN	3.18756e-08	1.22055e-08	0.00450621
MS	T.4Nve.MLN	1.3511e-08	7.40921e-09	0.034111
PBC	T.4Nve.MLN	3.08742e-08	2.31367e-08	0.0910323
RA	T.4Nve.MLN	8.45989e-09	5.55716e-09	0.0639618
AOA	T.4Nve.PP	3.10499e-10	1.20098e-09	0.397996
B-ALL	T.4Nve.PP	1.45732e-09	1.24652e-09	0.121179
CD	T.4Nve.PP	7.24369e-08	4.61257e-08	0.0581582
HT	T.4Nve.PP	3.99356e-09	3.09757e-09	0.0986546
IBD	T.4Nve.PP	1.77395e-08	1.12652e-08	0.0576609
MS	T.4Nve.PP	1.05899e-08	7.66756e-09	0.0836199
PBC	T.4Nve.PP	5.23013e-08	2.27429e-08	0.0107333
RA	T.4Nve.PP	1.8095e-08	6.2897e-09	0.00200789
AOA	T.4Nve.Sp	9.6098e-11	1.50682e-09	0.474575
B-ALL	T.4Nve.Sp	2.07185e-09	1.49271e-09	0.0825717
CD	T.4Nve.Sp	1.39721e-07	5.53903e-08	0.00582664
HT	T.4Nve.Sp	8.0404e-09	3.84686e-09	0.0183036
IBD	T.4Nve.Sp	3.66461e-08	1.41574e-08	0.00482014
MS	T.4Nve.Sp	8.58419e-09	8.75709e-09	0.16348
PBC	T.4Nve.Sp	2.04562e-08	2.5594e-08	0.21207
RA	T.4Nve.Sp	1.74233e-08	7.25589e-09	0.00816933
AOA	T.4Nve44-49d-11a-.Sp	3.17367e-09	1.75101e-09	0.0349566
B-ALL	T.4Nve44-49d-11a-.Sp	5.75804e-10	1.20162e-09	0.315902
CD	T.4Nve44-49d-11a-.Sp	1.17627e-07	4.81205e-08	0.0072543
HT	T.4Nve44-49d-11a-.Sp	4.10036e-09	1.928e-09	0.0167208
IBD	T.4Nve44-49d-11a-.Sp	2.63623e-08	1.31865e-08	0.0227944
MS	T.4Nve44-49d-11a-.Sp	2.52896e-08	8.26434e-09	0.00110636
PBC	T.4Nve44-49d-11a-.Sp	2.56331e-08	2.08167e-08	0.109092
RA	T.4Nve44-49d-11a-.Sp	1.3141e-08	6.24311e-09	0.017651
AOA	T.4SP24int.Th	5.78996e-10	1.37125e-09	0.336425
B-ALL	T.4SP24int.Th	1.35875e-09	1.45525e-09	0.175232
CD	T.4SP24int.Th	1.34857e-07	5.62673e-08	0.00827141
HT	T.4SP24int.Th	7.9739e-09	4.14551e-09	0.0272085
IBD	T.4SP24int.Th	2.95155e-08	1.34678e-08	0.0142055
MS	T.4SP24int.Th	1.68413e-08	8.75332e-09	0.0271782
PBC	T.4SP24int.Th	3.63756e-08	2.03646e-08	0.0370321
RA	T.4SP24int.Th	1.66732e-08	6.7861e-09	0.00700597
AOA	T.4SP69+.Th	1.31768e-09	1.46244e-09	0.18379
B-ALL	T.4SP69+.Th	2.06517e-09	1.4546e-09	0.07784
CD	T.4SP69+.Th	1.00578e-07	5.07257e-08	0.0236963
HT	T.4SP69+.Th	6.18683e-09	3.85821e-09	0.0544068
IBD	T.4SP69+.Th	2.9715e-08	1.26543e-08	0.00943169
MS	T.4SP69+.Th	1.69671e-08	9.00321e-09	0.0297447
PBC	T.4SP69+.Th	4.75863e-08	2.73309e-08	0.0408312
RA	T.4SP69+.Th	2.70268e-08	6.81456e-09	3.65381e-05
AOA	T.8Eff.Sp.OT1.12hr.LisOva	2.88353e-11	1.78496e-09	0.493556
B-ALL	T.8Eff.Sp.OT1.12hr.LisOva	-2.95223e-10	1.43392e-09	0.58156
CD	T.8Eff.Sp.OT1.12hr.LisOva	1.46966e-07	5.90653e-08	0.00641954
HT	T.8Eff.Sp.OT1.12hr.LisOva	3.65642e-09	4.07535e-09	0.184805
IBD	T.8Eff.Sp.OT1.12hr.LisOva	2.57109e-08	1.4942e-08	0.0426513
MS	T.8Eff.Sp.OT1.12hr.LisOva	1.29047e-08	7.57576e-09	0.0442447
PBC	T.8Eff.Sp.OT1.12hr.LisOva	4.335e-08	2.16897e-08	0.0228235
RA	T.8Eff.Sp.OT1.12hr.LisOva	1.15732e-08	6.74257e-09	0.043041
AOA	T.8Eff.Sp.OT1.24hr.LisOva	-2.90892e-10	1.72516e-09	0.566951
B-ALL	T.8Eff.Sp.OT1.24hr.LisOva	2.29399e-09	2.14836e-09	0.142808
CD	T.8Eff.Sp.OT1.24hr.LisOva	9.98963e-08	5.94802e-08	0.0465285
HT	T.8Eff.Sp.OT1.24hr.LisOva	4.50426e-09	4.19314e-09	0.141367
IBD	T.8Eff.Sp.OT1.24hr.LisOva	2.33168e-08	1.60677e-08	0.0733677
MS	T.8Eff.Sp.OT1.24hr.LisOva	9.74396e-09	8.13005e-09	0.115359
PBC	T.8Eff.Sp.OT1.24hr.LisOva	1.42695e-08	2.38033e-08	0.274427
RA	T.8Eff.Sp.OT1.24hr.LisOva	5.4291e-09	6.6621e-09	0.207558
AOA	T.8Eff.Sp.OT1.48hr.LisOva	-9.50082e-10	1.78721e-09	0.702499
B-ALL	T.8Eff.Sp.OT1.48hr.LisOva	1.98123e-09	2.4854e-09	0.212683
CD	T.8Eff.Sp.OT1.48hr.LisOva	-3.20278e-08	5.7112e-08	0.712529
HT	T.8Eff.Sp.OT1.48hr.LisOva	2.89783e-09	3.14059e-09	0.178082
IBD	T.8Eff.Sp.OT1.48hr.LisOva	-2.70458e-09	1.47893e-08	0.572552
MS	T.8Eff.Sp.OT1.48hr.LisOva	-1.53847e-09	8.68817e-09	0.570276
PBC	T.8Eff.Sp.OT1.48hr.LisOva	1.21037e-08	2.73368e-08	0.328968
RA	T.8Eff.Sp.OT1.48hr.LisOva	4.08985e-09	7.63705e-09	0.296143
AOA	T.8Eff.Sp.OT1.d10.LisOva	1.08422e-09	1.77317e-09	0.270448
B-ALL	T.8Eff.Sp.OT1.d10.LisOva	1.36918e-09	1.2629e-09	0.139148
CD	T.8Eff.Sp.OT1.d10.LisOva	9.16353e-08	5.45336e-08	0.0464451
HT	T.8Eff.Sp.OT1.d10.LisOva	2.08576e-09	1.89307e-09	0.135278
IBD	T.8Eff.Sp.OT1.d10.LisOva	1.63766e-08	1.31947e-08	0.107276
MS	T.8Eff.Sp.OT1.d10.LisOva	3.83483e-09	8.46381e-09	0.325244
PBC	T.8Eff.Sp.OT1.d10.LisOva	2.82955e-08	2.65313e-08	0.1431
RA	T.8Eff.Sp.OT1.d10.LisOva	6.79405e-09	5.2576e-09	0.0981381
AOA	T.8Eff.Sp.OT1.d15.LisOva	6.86122e-10	1.57341e-09	0.331392
B-ALL	T.8Eff.Sp.OT1.d15.LisOva	9.31019e-10	1.31851e-09	0.240058
CD	T.8Eff.Sp.OT1.d15.LisOva	3.74208e-08	5.15234e-08	0.233831
HT	T.8Eff.Sp.OT1.d15.LisOva	4.68423e-09	2.98426e-09	0.0582486
IBD	T.8Eff.Sp.OT1.d15.LisOva	3.2031e-09	1.21183e-08	0.395767
MS	T.8Eff.Sp.OT1.d15.LisOva	9.70854e-09	8.04548e-09	0.113772
PBC	T.8Eff.Sp.OT1.d15.LisOva	4.37412e-08	2.4787e-08	0.0388085
RA	T.8Eff.Sp.OT1.d15.LisOva	2.31524e-09	4.93395e-09	0.319446
AOA	T.8Eff.Sp.OT1.d15.VSVOva	1.35304e-09	1.65107e-09	0.206253
B-ALL	T.8Eff.Sp.OT1.d15.VSVOva	-1.20652e-09	1.14628e-09	0.853728
CD	T.8Eff.Sp.OT1.d15.VSVOva	-5.75636e-08	4.25791e-08	0.9118
HT	T.8Eff.Sp.OT1.d15.VSVOva	5.58411e-09	2.61903e-09	0.0164981
IBD	T.8Eff.Sp.OT1.d15.VSVOva	-9.75772e-09	1.08137e-08	0.816565
MS	T.8Eff.Sp.OT1.d15.VSVOva	2.62461e-09	6.07093e-09	0.332753
PBC	T.8Eff.Sp.OT1.d15.VSVOva	2.29392e-08	2.01154e-08	0.127065
RA	T.8Eff.Sp.OT1.d15.VSVOva	1.94287e-09	4.46938e-09	0.331888
AOA	T.8Eff.Sp.OT1.d5.VSVOva	1.01877e-09	1.88417e-09	0.294357
B-ALL	T.8Eff.Sp.OT1.d5.VSVOva	2.34247e-09	1.6968e-09	0.0837128
CD	T.8Eff.Sp.OT1.d5.VSVOva	-4.25124e-08	5.52758e-08	0.779082
HT	T.8Eff.Sp.OT1.d5.VSVOva	5.39176e-09	2.76967e-09	0.0257843
IBD	T.8Eff.Sp.OT1.d5.VSVOva	-3.42249e-09	1.40335e-08	0.596338
MS	T.8Eff.Sp.OT1.d5.VSVOva	1.08024e-08	8.46828e-09	0.101044
PBC	T.8Eff.Sp.OT1.d5.VSVOva	2.92846e-08	2.68979e-08	0.138136
RA	T.8Eff.Sp.OT1.d5.VSVOva	7.24823e-09	5.90281e-09	0.109737
AOA	T.8Eff.Sp.OT1.d6.LisOva	-1.72862e-11	1.94377e-09	0.503548
B-ALL	T.8Eff.Sp.OT1.d6.LisOva	2.46182e-09	1.60272e-09	0.0622658
CD	T.8Eff.Sp.OT1.d6.LisOva	2.20486e-09	5.64084e-08	0.48441
HT	T.8Eff.Sp.OT1.d6.LisOva	6.14324e-09	2.66065e-09	0.0104738
IBD	T.8Eff.Sp.OT1.d6.LisOva	-3.19386e-09	1.33764e-08	0.594358
MS	T.8Eff.Sp.OT1.d6.LisOva	-1.81597e-09	7.82142e-09	0.5918
PBC	T.8Eff.Sp.OT1.d6.LisOva	1.61007e-08	2.72793e-08	0.277524
RA	T.8Eff.Sp.OT1.d6.LisOva	1.16497e-08	6.85434e-09	0.0446026
AOA	T.8Eff.Sp.OT1.d8.LisOva	2.27192e-10	1.71047e-09	0.447166
B-ALL	T.8Eff.Sp.OT1.d8.LisOva	2.0093e-09	1.36187e-09	0.0700527
CD	T.8Eff.Sp.OT1.d8.LisOva	5.08487e-08	5.16177e-08	0.162287
HT	T.8Eff.Sp.OT1.d8.LisOva	2.64424e-09	1.99739e-09	0.0927772
IBD	T.8Eff.Sp.OT1.d8.LisOva	5.07746e-10	1.24169e-08	0.483691
MS	T.8Eff.Sp.OT1.d8.LisOva	2.55072e-09	8.30607e-09	0.379387
PBC	T.8Eff.Sp.OT1.d8.LisOva	2.21241e-08	2.82201e-08	0.216524
RA	T.8Eff.Sp.OT1.d8.LisOva	6.14891e-09	5.05354e-09	0.111849
AOA	T.8Eff.Sp.OT1.d8.VSVOva	7.69572e-10	1.72394e-09	0.327653
B-ALL	T.8Eff.Sp.OT1.d8.VSVOva	7.68092e-10	1.24973e-09	0.269407
CD	T.8Eff.Sp.OT1.d8.VSVOva	4.27101e-09	4.93203e-08	0.465496
HT	T.8Eff.Sp.OT1.d8.VSVOva	3.39785e-09	2.17931e-09	0.0594821
IBD	T.8Eff.Sp.OT1.d8.VSVOva	-4.28928e-09	1.16905e-08	0.643154
MS	T.8Eff.Sp.OT1.d8.VSVOva	-1.82471e-09	8.01739e-09	0.590019
PBC	T.8Eff.Sp.OT1.d8.VSVOva	1.13048e-08	2.50509e-08	0.325897
RA	T.8Eff.Sp.OT1.d8.VSVOva	8.10947e-09	5.09019e-09	0.0555624
AOA	T.8Eff.Tbet-.Sp.OT1.d6LisOVA	3.02607e-09	2.53661e-09	0.116443
B-ALL	T.8Eff.Tbet-.Sp.OT1.d6LisOVA	-2.17752e-10	1.3473e-09	0.564198
CD	T.8Eff.Tbet-.Sp.OT1.d6LisOVA	9.07101e-08	5.24405e-08	0.0418356
HT	T.8Eff.Tbet-.Sp.OT1.d6LisOVA	5.05977e-09	2.65198e-09	0.0282006
IBD	T.8Eff.Tbet-.Sp.OT1.d6LisOVA	1.77868e-08	1.40745e-08	0.103159
MS	T.8Eff.Tbet-.Sp.OT1.d6LisOVA	2.33959e-08	9.24828e-09	0.00570705
PBC	T.8Eff.Tbet-.Sp.OT1.d6LisOVA	4.67051e-08	2.73703e-08	0.0439654
RA	T.8Eff.Tbet-.Sp.OT1.d6LisOVA	1.73802e-08	6.59619e-09	0.00420838
AOA	T.8Eff.Tbet+.Sp.OT1.d6LisOVA	1.65918e-09	2.3376e-09	0.238921
B-ALL	T.8Eff.Tbet+.Sp.OT1.d6LisOVA	-5.69044e-10	1.30475e-09	0.66863
CD	T.8Eff.Tbet+.Sp.OT1.d6LisOVA	6.92186e-08	5.78596e-08	0.115786
HT	T.8Eff.Tbet+.Sp.OT1.d6LisOVA	6.24417e-09	2.65682e-09	0.00938061
IBD	T.8Eff.Tbet+.Sp.OT1.d6LisOVA	-6.14831e-10	1.35379e-08	0.518112
MS	T.8Eff.Tbet+.Sp.OT1.d6LisOVA	1.4404e-08	8.97349e-09	0.0542281
PBC	T.8Eff.Tbet+.Sp.OT1.d6LisOVA	8.166e-09	3.0775e-08	0.395372
RA	T.8Eff.Tbet+.Sp.OT1.d6LisOVA	1.34588e-08	6.84785e-09	0.0246833
AOA	T.8EffKLRG1+CD127-.Sp.d8.LisOVA	1.35952e-09	1.31419e-09	0.150453
B-ALL	T.8EffKLRG1+CD127-.Sp.d8.LisOVA	-1.013e-09	9.00204e-10	0.869769
CD	T.8EffKLRG1+CD127-.Sp.d8.LisOVA	-1.50884e-08	3.89949e-08	0.650597
HT	T.8EffKLRG1+CD127-.Sp.d8.LisOVA	-1.67431e-09	1.48334e-09	0.870496
IBD	T.8EffKLRG1+CD127-.Sp.d8.LisOVA	-6.81939e-09	8.67289e-09	0.784151
MS	T.8EffKLRG1+CD127-.Sp.d8.LisOVA	8.22277e-10	5.49305e-09	0.440503
PBC	T.8EffKLRG1+CD127-.Sp.d8.LisOVA	-4.99692e-09	1.61237e-08	0.621686
RA	T.8EffKLRG1+CD127-.Sp.d8.LisOVA	-1.93528e-09	4.25329e-09	0.675448
AOA	T.8Mem.LN	-1.98399e-12	1.54561e-09	0.500512
B-ALL	T.8Mem.LN	-8.0892e-10	1.11686e-09	0.765554
CD	T.8Mem.LN	-2.16464e-08	4.49362e-08	0.684996
HT	T.8Mem.LN	4.23135e-09	3.19699e-09	0.0928275
IBD	T.8Mem.LN	1.79993e-09	1.16187e-08	0.438444
MS	T.8Mem.LN	8.68603e-09	6.96953e-09	0.106329
PBC	T.8Mem.LN	2.64505e-08	1.53882e-08	0.0428182
RA	T.8Mem.LN	9.0575e-09	5.17153e-09	0.0399371
AOA	T.8Mem.Sp	1.84017e-09	1.72118e-09	0.142506
B-ALL	T.8Mem.Sp	2.08921e-09	1.46491e-09	0.0769101
CD	T.8Mem.Sp	9.53644e-08	4.74508e-08	0.0222286
HT	T.8Mem.Sp	6.34496e-09	3.35382e-09	0.0292546
IBD	T.8Mem.Sp	1.67699e-08	1.2746e-08	0.094138
MS	T.8Mem.Sp	6.56637e-09	7.99405e-09	0.205707
PBC	T.8Mem.Sp	3.72562e-08	2.49383e-08	0.0675965
RA	T.8Mem.Sp	1.38891e-08	5.96787e-09	0.00997414
AOA	T.8Mem.Sp.OT1.d100.LisOva	1.10983e-09	1.72449e-09	0.259927
B-ALL	T.8Mem.Sp.OT1.d100.LisOva	1.71421e-09	1.51158e-09	0.128386
CD	T.8Mem.Sp.OT1.d100.LisOva	1.27671e-07	5.44515e-08	0.00952204
HT	T.8Mem.Sp.OT1.d100.LisOva	5.00528e-09	2.75509e-09	0.0346286
IBD	T.8Mem.Sp.OT1.d100.LisOva	1.97891e-08	1.25978e-08	0.0581106
MS	T.8Mem.Sp.OT1.d100.LisOva	1.46267e-08	8.25724e-09	0.0382492
PBC	T.8Mem.Sp.OT1.d100.LisOva	4.97051e-08	2.47409e-08	0.0222673
RA	T.8Mem.Sp.OT1.d100.LisOva	9.32976e-09	5.40387e-09	0.0421292
AOA	T.8Mem.Sp.OT1.d106.VSVOva	7.29828e-10	1.48923e-09	0.312042
B-ALL	T.8Mem.Sp.OT1.d106.VSVOva	1.32179e-09	1.28106e-09	0.151085
CD	T.8Mem.Sp.OT1.d106.VSVOva	6.08991e-08	4.73608e-08	0.0992469
HT	T.8Mem.Sp.OT1.d106.VSVOva	4.39664e-09	2.27997e-09	0.0269038
IBD	T.8Mem.Sp.OT1.d106.VSVOva	9.80553e-09	1.15734e-08	0.198429
MS	T.8Mem.Sp.OT1.d106.VSVOva	5.71147e-09	6.97162e-09	0.206323
PBC	T.8Mem.Sp.OT1.d106.VSVOva	1.98201e-08	2.25236e-08	0.189438
RA	T.8Mem.Sp.OT1.d106.VSVOva	4.39381e-09	4.63311e-09	0.171476
AOA	T.8Mem.Sp.OT1.d45.LisOva	1.14991e-09	1.7953e-09	0.26092
B-ALL	T.8Mem.Sp.OT1.d45.LisOva	3.87906e-10	1.1995e-09	0.3732
CD	T.8Mem.Sp.OT1.d45.LisOva	1.16674e-07	5.39682e-08	0.0153129
HT	T.8Mem.Sp.OT1.d45.LisOva	4.54368e-09	2.52526e-09	0.035986
IBD	T.8Mem.Sp.OT1.d45.LisOva	1.64222e-08	1.3562e-08	0.112968
MS	T.8Mem.Sp.OT1.d45.LisOva	1.22468e-08	8.15402e-09	0.0665578
PBC	T.8Mem.Sp.OT1.d45.LisOva	3.99416e-08	2.64643e-08	0.0656161
RA	T.8Mem.Sp.OT1.d45.LisOva	7.63258e-09	5.33347e-09	0.0762048
AOA	T.8MemKLRG1-CD127+.Sp.d8.LisOVA	5.12729e-10	1.27383e-09	0.343654
B-ALL	T.8MemKLRG1-CD127+.Sp.d8.LisOVA	-8.78057e-10	8.53671e-10	0.848158
CD	T.8MemKLRG1-CD127+.Sp.d8.LisOVA	2.85175e-09	3.96918e-08	0.471362
HT	T.8MemKLRG1-CD127+.Sp.d8.LisOVA	-2.5428e-10	1.55333e-09	0.565016
IBD	T.8MemKLRG1-CD127+.Sp.d8.LisOVA	3.42184e-09	9.16488e-09	0.354438
MS	T.8MemKLRG1-CD127+.Sp.d8.LisOVA	1.40513e-08	6.06427e-09	0.0102503
PBC	T.8MemKLRG1-CD127+.Sp.d8.LisOVA	1.5662e-08	1.77635e-08	0.188972
RA	T.8MemKLRG1-CD127+.Sp.d8.LisOVA	7.39639e-10	4.91893e-09	0.440238
AOA	T.8Nve.PP	5.53668e-10	1.56548e-09	0.361792
B-ALL	T.8Nve.PP	1.10957e-09	1.30273e-09	0.197184
CD	T.8Nve.PP	-5.38939e-08	4.28808e-08	0.895592
HT	T.8Nve.PP	3.44203e-09	2.22915e-09	0.061282
IBD	T.8Nve.PP	-5.96575e-09	1.07347e-08	0.710807
MS	T.8Nve.PP	1.15155e-08	7.0891e-09	0.052146
PBC	T.8Nve.PP	9.3882e-09	1.66424e-08	0.286338
RA	T.8Nve.PP	4.10743e-09	4.11772e-09	0.159261
AOA	T.8Nve.Sp	-1.15044e-09	1.30854e-09	0.810348
B-ALL	T.8Nve.Sp	1.3071e-09	1.32656e-09	0.162231
CD	T.8Nve.Sp	-2.3383e-08	3.86603e-08	0.727355
HT	T.8Nve.Sp	2.54101e-09	2.32905e-09	0.137635
IBD	T.8Nve.Sp	-6.05402e-09	1.01887e-08	0.723807
MS	T.8Nve.Sp	6.92907e-09	5.90857e-09	0.120455
PBC	T.8Nve.Sp	1.87854e-08	1.5855e-08	0.118043
RA	T.8Nve.Sp	1.2981e-08	5.56407e-09	0.00982386
AOA	T.8Nve.Sp.OT1	-5.67933e-10	1.40257e-09	0.657233
B-ALL	T.8Nve.Sp.OT1	1.64002e-09	1.49429e-09	0.136205
CD	T.8Nve.Sp.OT1	9.41315e-08	4.93479e-08	0.0282273
HT	T.8Nve.Sp.OT1	6.67548e-09	3.36392e-09	0.0236037
IBD	T.8Nve.Sp.OT1	1.67736e-08	1.19957e-08	0.0810107
MS	T.8Nve.Sp.OT1	1.30963e-08	8.22644e-09	0.0556949
PBC	T.8Nve.Sp.OT1	1.77549e-08	2.19825e-08	0.209636
RA	T.8Nve.Sp.OT1	1.1525e-08	5.69516e-09	0.0215033
AOA	T.8SP24-.Th	-9.87225e-10	1.60064e-09	0.731306
B-ALL	T.8SP24-.Th	3.47219e-09	2.42005e-09	0.0756776
CD	T.8SP24-.Th	1.02883e-07	5.44708e-08	0.0294611
HT	T.8SP24-.Th	6.89782e-09	3.8735e-09	0.037475
IBD	T.8SP24-.Th	2.59062e-08	1.31508e-08	0.0244232
MS	T.8SP24-.Th	2.23383e-08	8.67853e-09	0.00502694
PBC	T.8SP24-.Th	3.68994e-09	2.32999e-09	0.0566343
RA	T.8SP24-.Th	1.52592e-08	6.27133e-09	0.00748372
AOA	T.DP.69-.e17.Th.v2	-3.8306e-10	1.59165e-09	0.595094
B-ALL	T.DP.69-.e17.Th.v2	2.67429e-09	2.00542e-09	0.0911784
CD	T.DP.69-.e17.Th.v2	-6.39184e-09	4.42163e-08	0.55747
HT	T.DP.69-.e17.Th.v2	6.22787e-09	3.41776e-09	0.0342117
IBD	T.DP.69-.e17.Th.v2	4.52132e-09	1.16366e-08	0.348807
MS	T.DP.69-.e17.Th.v2	1.63549e-08	7.00748e-09	0.00979998
PBC	T.DP.69-.e17.Th.v2	1.11121e-08	1.7161e-08	0.258647
RA	T.DP.69-.e17.Th.v2	8.23693e-09	6.3238e-09	0.0963681
AOA	T.DP.Th	-1.45991e-09	1.3069e-09	0.86802
B-ALL	T.DP.Th	2.57149e-10	1.06165e-09	0.404306
CD	T.DP.Th	-4.95094e-08	4.304e-08	0.874992
HT	T.DP.Th	-3.04137e-11	2.20198e-09	0.50551
IBD	T.DP.Th	-5.94332e-09	1.16143e-08	0.695579
MS	T.DP.Th	9.6395e-09	6.49684e-09	0.0689416
PBC	T.DP.Th	1.25775e-08	1.60294e-08	0.216329
RA	T.DP.Th	7.13302e-09	5.31753e-09	0.0898925
AOA	T.DP69+.Th	1.87933e-10	1.32718e-09	0.443697
B-ALL	T.DP69+.Th	1.2027e-09	1.48688e-09	0.209295
CD	T.DP69+.Th	2.9862e-08	4.78364e-08	0.266231
HT	T.DP69+.Th	4.35534e-09	3.59922e-09	0.113125
IBD	T.DP69+.Th	4.68141e-09	1.14299e-08	0.341058
MS	T.DP69+.Th	2.34448e-08	8.7043e-09	0.0035356
PBC	T.DP69+.Th	4.09363e-08	2.05075e-08	0.0229584
RA	T.DP69+.Th	2.01018e-08	6.62158e-09	0.00119947
AOA	T.DP69+.Th.v2	2.60067e-09	1.51005e-09	0.0425126
B-ALL	T.DP69+.Th.v2	2.72926e-10	1.03729e-09	0.396231
CD	T.DP69+.Th.v2	6.83484e-08	4.22345e-08	0.0527982
HT	T.DP69+.Th.v2	2.25992e-09	2.49733e-09	0.18275
IBD	T.DP69+.Th.v2	2.13851e-08	1.08684e-08	0.024555
MS	T.DP69+.Th.v2	2.60587e-08	8.49327e-09	0.00107691
PBC	T.DP69+.Th.v2	2.57879e-08	2.41083e-08	0.142384
RA	T.DP69+.Th.v2	1.98089e-08	6.95942e-09	0.0022112
AOA	T.ISP.Th	1.14167e-09	1.43916e-09	0.213805
B-ALL	T.ISP.Th	2.28702e-09	1.91837e-09	0.116598
CD	T.ISP.Th	2.67702e-08	4.74967e-08	0.286506
HT	T.ISP.Th	5.60549e-09	2.81576e-09	0.0232538
IBD	T.ISP.Th	1.30712e-08	1.28172e-08	0.153908
MS	T.ISP.Th	1.03215e-08	8.01378e-09	0.0988789
PBC	T.ISP.Th	-1.00831e-08	2.26735e-08	0.671734
RA	T.ISP.Th	5.63128e-09	6.65627e-09	0.198773
AOA	Tgd.Sp	2.96404e-10	1.34142e-09	0.412561
B-ALL	Tgd.Sp	2.8985e-10	1.14267e-09	0.399879
CD	Tgd.Sp	-7.02676e-09	3.68508e-08	0.575612
HT	Tgd.Sp	4.26955e-09	2.93068e-09	0.0725794
IBD	Tgd.Sp	2.61447e-09	9.83872e-09	0.395222
[truncated: 1,911 more rows]

## Sheet: Table S6
Table S5 MAGMA Gene-set analysis
Note: Magma gene-set analysis based on genome-wide pleiotropic results conducted by PLACO; NGENES represents the genes exist in corresponding gene sets; Beta is the estimate value; P is the P values for enrichment analysis; Pbon represents the Bonferronni adjusted P values. Abbreviations: SD is the standard deviation; SE is the standard error of estimation; GlycA, Glycoprotein acetyls; RA, Rheuma…
Trait pairs	Gene Sets	NGENES	BETA	SD	SE	P	Pbon
GlycA-AS	GOMF_MHC_CLASS_II_RECEPTOR_ACTIVITY	9	2.0675	0.045134	0.36868	1.039e-08	0.000176724
GlycA-PsA	GOMF_MHC_CLASS_II_RECEPTOR_ACTIVITY	9	2.1027	0.045745	0.38761	2.9398e-08	0.000500031
GlycA-AS	GOMF_PEPTIDE_ANTIGEN_BINDING	28	0.99496	0.038291	0.18873	6.8361e-08	0.00116268
GlycA-RA	GOBP_CELL_ACTIVATION	1022	0.15691	0.03555	0.030444	1.2883e-07	0.00219127
GlycA-RA	WP_GENES_ASSOCIATED_WITH_THE_DEVELOPMENT_OF_RHEUMATOID_ARTHRITIS	17	1.0929	0.032823	0.21272	1.4051e-07	0.00238979
GlycA-AS	KEGG_ALLOGRAFT_REJECTION	34	0.8862	0.037576	0.17364	1.6841e-07	0.00286415
GlycA-RA	GOBP_REGULATION_OF_CELL_ACTIVATION	608	0.19736	0.034886	0.038863	1.9248e-07	0.00327351
GlycA-PsA	GOBP_PEPTIDE_ANTIGEN_ASSEMBLY_WITH_MHC_CLASS_II_PROTEIN_COMPLEX	14	1.402	0.038036	0.27668	2.0399e-07	0.00346946
GlycA-AS	KEGG_ASTHMA	27	0.95988	0.036276	0.18958	2.0817e-07	0.00354014
GlycA-AS	GOBP_PEPTIDE_ANTIGEN_ASSEMBLY_WITH_MHC_CLASS_II_PROTEIN_COMPLEX	14	1.5085	0.041066	0.30273	3.1608e-07	0.00537494
GlycA-RA	GOBP_POSITIVE_REGULATION_OF_IMMUNE_SYSTEM_PROCESS	923	0.15754	0.034015	0.031852	3.8199e-07	0.00649612
GlycA-PsA	GOBP_PEPTIDE_ANTIGEN_ASSEMBLY_WITH_MHC_PROTEIN_COMPLEX	18	1.1541	0.035499	0.23392	4.0729e-07	0.00692678
GlycA-RA	WP_TCELL_ACTIVATION_SARSCOV2	86	0.49606	0.033447	0.10062	4.1522e-07	0.00706082
GlycA-AS	GOCC_MHC_PROTEIN_COMPLEX	23	1.0574	0.036886	0.21455	4.1832e-07	0.00711311
GlycA-RA	ZHENG_BOUND_BY_FOXP3	472	0.21929	0.034281	0.045669	7.9284e-07	0.0134815
GlycA-AS	KEGG_TYPE_I_DIABETES_MELLITUS	41	0.77725	0.036184	0.16221	8.3454e-07	0.0141897
GlycA-RA	GOBP_ANTIGEN_PROCESSING_AND_PRESENTATION_OF_EXOGENOUS_ANTIGEN	44	0.73394	0.035437	0.15378	9.1609e-07	0.0155763
GlycA-RA	GOBP_ANTIGEN_PROCESSING_AND_PRESENTATION_OF_EXOGENOUS_PEPTIDE_ANTIGEN	35	0.7961	0.03429	0.16728	9.7997e-07	0.0166614
GlycA-RA	GOMF_MHC_CLASS_II_RECEPTOR_ACTIVITY	8	1.9317	0.039807	0.4062	9.9783e-07	0.0169641
GlycA-PsA	GOCC_MHC_CLASS_II_PROTEIN_COMPLEX	15	1.2431	0.03491	0.26154	1.0097e-06	0.017171
GlycA-RA	GOBP_CORNIFICATION	9	1.6106	0.035203	0.34355	1.3899e-06	0.0236283
GlycA-RA	GOBP_NEGATIVE_REGULATION_OF_ANTIGEN_PROCESSING_AND_PRESENTATION	9	1.558	0.034054	0.33505	1.6708e-06	0.0284019
GlycA-RA	GOBP_POSITIVE_REGULATION_OF_CELL_ACTIVATION	361	0.23212	0.031829	0.050283	1.9686e-06	0.0334623
GlycA-AS	GOCC_PROTEIN_LIPID_COMPLEX	38	0.68125	0.030535	0.14867	2.3147e-06	0.0393545
GlycA-RA	GOBP_LYMPHOCYTE_ACTIVATION	728	0.16445	0.031705	0.03615	2.7109e-06	0.0460772
GlycA-RA	GOBP_REGULATION_OF_LYMPHOCYTE_ACTIVATION	473	0.20075	0.031415	0.044275	2.9124e-06	0.0494992
GlycA-PsA	GOBP_POSITIVE_REGULATION_OF_CELL_ADHESION	455	0.19621	0.029994	0.043294	2.9391e-06	0.0499794

## Sheet: Table S7
Table S6 MAGMA tissue-specific analysis
Note: Magma tissue-specific analysis (GTEx tissues) based on genome-wide pleiotropic results conducted by PLACO; NGENES represents the genes exist in corresponding gene sets; Beta is the estimate value; P is the P values for enrichment analysis; Pbon represents the Bonferronni adjusted P values. Abbreviations: SD is the standard deviation; SE is the standard error of estimation; GlycA, Glycoprote…
Trait pairs	Tissues	NGENES	BETA	SD	SE	P	Pbon
GlycA-RA	Whole_Blood	17183	0.022902	0.041373	0.0062065	0.00011248	0.00607392
GlycA-RA	Small_Intestine_Terminal_Ileum	17183	0.038179	0.070091	0.010521	0.00014274	0.00770796
GlycA-RA	Spleen	17183	0.028401	0.056215	0.0080801	0.00022055	0.0119097
GlycA-AS	Liver	17275	0.023709	0.042689	0.0067885	0.00023982	0.0129503
GlycA-RA	Cells_EBV-transformed_lymphocytes	17183	0.018452	0.040258	0.0053968	0.00031491	0.0170051
GlycA-AS	Whole_Blood	17275	0.016227	0.029337	0.0060942	0.0038798	0.209509
GlycA-RA	Lung	17183	0.024714	0.047699	0.010112	0.0072663	0.39238
GlycA-PsA	Liver	17292	0.01609	0.028964	0.0066299	0.0076194	0.411448
GlycA-RA	Liver	17183	0.016944	0.030489	0.0069941	0.0077102	0.416351
GlycA-PsA	Brain_Cerebellum	17292	0.013282	0.02636	0.0065721	0.021652	1
GlycA-PsA	Skin_Not_Sun_Exposed_Suprapubic	17292	0.014285	0.027542	0.0081019	0.038948	1
GlycA-PsA	Esophagus_Mucosa	17292	0.014065	0.027183	0.008001	0.039395	1
GlycA-AS	Spleen	17275	0.013658	0.027058	0.0079455	0.042822	1
GlycA-RA	Colon_Transverse	17183	0.021103	0.038744	0.012665	0.047836	1
GlycA-RA	Thyroid	17183	0.017644	0.034884	0.010666	0.049056	1

## Sheet: Table S8
Table S3 Shared pleiotropic loci idendified by PLACO and coloc
Note: Lead SNPs represents the top SNPs (smallest P-values) in genomic loci; Position represents the physical position of lead SNPs; PPH0, PPH1, PPH2, PPH3, PPH4 present the probabilies calculated with coloc packages. Abbreviations: GlycA, Glycoprotein acetyls; RA, Rheumatoid arthritis; AS, Ankylosing spondylitis; PsA, Psoriatic arthritis..
uniqID	rsID	chr	pos	p	start	end	nSNPs	nGWASSNPs	nIndSigSNPs	IndSigSNPs	nLeadSNPs	LeadSNPs	nsnps	PP.H0.abf	PP.H1.abf	PP.H2.abf	PP.H3.abf	PP.H4.abf	phen1	phen2
21:40465901:C:T	rs4817987	21	40465901	1.67369e-10	40458508	40468838	25	20	1	rs4817987	1	rs4817987	32	0.000203338	0.000565444	0.00442342	0.0113172	0.983491	GlycA	AS
1:154419892:A:G	rs12730935	1	154419892	6.50267e-11	154395212	154428283	36	29	1	rs12730935	1	rs12730935	106	4.1981e-05	0.000792237	0.00137322	0.0249415	0.972851	GlycA	RA
1:154420778:C:T	rs7529229	1	154420778	3.92558e-10	154395212	154428283	36	28	1	rs7529229	1	rs7529229	118	0.000393883	0.00692171	0.00150148	0.0254197	0.965763	GlycA	AS
8:18272881:A:G	rs1495741	8	18272881	1.62318e-09	18255410	18291590	31	27	1	rs1495741	1	rs1495741	233	0.00273239	0.000918197	0.0277494	0.0083647	0.960235	GlycA	RA
2:113841030:A:G	rs6734238	2	113841030	5.99843e-11	113838102	113874467	61	52	1	rs6734238	1	rs6734238	235	6.90615e-05	0.0148613	0.000119499	0.0247546	0.960196	GlycA	RA
2:111876613:C:G	rs72836346	2	111876613	1.52869e-10	111861838	112024305	40	35	3	rs72836346;rs66494224;rs185241389	1	rs72836346	407	8.78393e-05	0.000554864	0.0172363	0.108004	0.874117	GlycA	RA
5:95272429:A:C	rs57471342	5	95272429	1.91201e-08	95217213	95349848	163	124	1	rs57471342	1	rs57471342	220	0.0100455	0.0267931	0.0248788	0.0654836	0.872799	GlycA	RA
9:136149229:C:T	rs505922	9	136149229	8.15515e-10	136132908	136155000	61	35	2	rs505922;rs507666	1	rs505922	158	6.72518e-06	0.246749	7.07899e-07	0.025245	0.727999	GlycA	PsA
16:30198151:A:G	rs1132812	16	30198151	1.77979e-10	29924422	30346692	119	94	2	rs1132812;rs55732507	1	rs1132812	435	8.31366e-05	0.0100554	0.00232471	0.280469	0.707068	GlycA	RA
4:48144525:C:T	rs17470919	4	48144525	3.60196e-08	48126580	48184130	36	33	1	rs17470919	1	rs17470919	180	0.0332509	0.00545039	0.234609	0.0377675	0.688922	GlycA	RA
17:45399047:A:T	rs185129555	17	45399047	6.96621e-09	45311069	45873200	11	11	1	rs185129555	1	rs185129555	1435	0.000279986	7.31086e-05	0.288249	0.0746294	0.636769	GlycA	PsA
14:71350617:C:G	rs36567	14	71350617	3.71721e-09	71350617	71613940	161	128	1	rs36567	1	rs36567	960	0.012766	0.022945	0.126592	0.226921	0.610776	GlycA	AS
6:28411244:A:G	rs13190937	6	28411244	1.03017e-15	27519947	29612334	480	375	21	rs13190937;rs2531805;rs2213806;rs34668037;rs6903989;rs4713211;rs3116835;rs35490225;rs7773534;rs114570214;rs114183654;rs3129128;rs3129180;rs17177618;rs9468532;rs115286515;rs1233392;rs75438822;rs3131854;rs362538;rs3130249	8	rs13190937;rs3116835;rs35490225;rs114570214;rs115286515;rs1233392;rs3131854;rs3130249	6935	2.03869e-43	4.02317e-42	0.0233169	0.459621	0.517062	GlycA	RA
2:163572751:A:G	rs73974051	2	163572751	6.00416e-10	163522976	164230553	8	8	2	rs73974051;rs141272952	1	rs73974051	1714	9.11839e-09	3.4917e-10	0.712444	0.0270211	0.260535	GlycA	PsA
16:70195473:A:G	rs141550381	16	70195473	3.37767e-11	70195473	70461187	2	2	1	rs141550381	1	rs141550381	244	1.12878e-05	0.302241	1.69402e-05	0.453343	0.244388	GlycA	PsA
18:12882359:C:G	rs4797709	18	12882359	9.80866e-10	12773838	12884343	39	34	1	rs4797709	1	rs4797709	327	8.69313e-07	2.17663e-08	0.778154	0.0192812	0.202564	GlycA	RA
3:27783476:A:G	rs4680838	3	27783476	3.68009e-08	27757018	27829161	44	36	1	rs4680838	1	rs4680838	272	0.000195431	2.2931e-06	0.805767	0.00926973	0.184766	GlycA	RA
6:36116634:C:T	rs2859133	6	36116634	9.70265e-11	36097513	36143597	18	14	1	rs2859133	1	rs2859133	94	1.2626e-10	5.28948e-13	0.813264	0.00322354	0.183513	GlycA	AS
8:9181395:A:G	rs2169387	8	9181395	4.03242e-09	9177732	9231661	45	31	2	rs2169387;rs76453951	1	rs2169387	396	1.15858e-17	0.795675	4.12197e-19	0.0281322	0.176192	GlycA	AS
6:26311416:A:C	rs144264189	6	26311416	2.60721e-08	26205539	26311416	2	2	1	rs144264189	1	rs144264189	391	2.58804e-07	1.55656e-08	0.783494	0.0469532	0.169552	GlycA	RA
2:27387429:C:T	rs2384575	2	27387429	3.23372e-10	27387429	27541053	108	75	1	rs2384575	1	rs2384575	394	1.2797e-17	0.807037	4.70873e-19	0.0295319	0.163431	GlycA	AS
6:159506600:C:T	rs2451258	6	159506600	9.30758e-10	159489791	159515309	15	14	1	rs2451258	1	rs2451258	62	6.07414e-07	2.4323e-09	0.836488	0.00318927	0.160322	GlycA	RA
8:8310923:A:G	rs876954	8	8310923	5.69394e-09	8088230	8661534	157	141	2	rs876954;rs2979154	1	rs876954	2839	6.08344e-06	0.666833	1.70463e-06	0.186706	0.146453	GlycA	RA
5:55455645:C:G	rs13186299	5	55455645	2.21359e-10	55453942	55567087	5	5	1	rs13186299	1	rs13186299	357	1.63082e-12	7.45067e-15	0.862772	0.0038083	0.13342	GlycA	RA
1:114451307:C:T	rs1217390	1	114451307	8.75833e-10	114451307	114451307	1	1	1	rs1217390	1	rs1217390	1	1.10124e-11	1.00033e-15	0.916728	0	0.0832725	GlycA	RA
16:71032562:C:T	rs8058197	16	71032562	2.57669e-10	70791349	71035763	8	5	2	rs79206176;rs8058197	2	rs79206176;rs8058197	328	3.80791e-26	0.894841	1.3318e-27	0.0312228	0.0739365	GlycA	RA
19:50036634:G:T	rs79476680	19	50036634	2.44788e-08	50016748	50053790	126	7	1	rs79476680	1	rs79476680	133	1.23618e-22	0.923671	1.56295e-24	0.0116136	0.0647149	GlycA	PsA
16:70829588:C:T	rs78203089	16	70829588	8.26153e-10	69560808	70921184	30	24	5	rs12446907;rs74340438;rs141746704;rs117459919;rs78203089	2	rs12446907;rs78203089	3382	1.90258e-18	0.687759	6.99657e-19	0.252858	0.0593829	GlycA	AS
8:19793581:C:T	rs190118115	8	19793581	3.17337e-08	19793581	19939605	3	2	1	rs190118115	1	rs190118115	616	5.52902e-30	0.914085	1.98392e-31	0.032746	0.0531695	GlycA	PsA
16:72362034:A:G	rs141694782	16	72362034	2.67157e-11	71581439	72913858	146	119	8	rs12149489;rs141694782;rs117431614;rs6499555;rs212174;rs180953756;rs74739802;rs139561666	5	rs12149489;rs141694782;rs212174;rs74739802;rs139561666	2888	2.14242e-209	0.648854	1.02719e-209	0.311056	0.0400898	GlycA	RA
8:9180784:C:T	rs117004555	8	9180784	1.9753e-10	9180784	9369737	5	2	1	rs117004555	1	rs117004555	870	1.04037e-17	0.685981	4.19477e-18	0.276548	0.0374709	GlycA	PsA
2:100835734:A:G	rs10865035	2	100835734	1.76254e-08	100732845	100857017	26	26	1	rs10865035	1	rs10865035	329	2.7648e-09	3.92557e-11	0.958751	0.0135851	0.0276644	GlycA	RA
16:72757436:A:G	rs8059738	16	72757436	1.47768e-11	72523850	72825114	66	21	1	rs8059738	1	rs8059738	418	3.5415e-30	0.923004	2.00719e-31	0.0522878	0.0247086	GlycA	PsA
1:63165652:C:T	rs113142226	1	63165652	6.51301e-09	62900811	63199936	283	194	1	rs113142226	1	rs113142226	378	4.07157e-14	0.954239	9.75387e-16	0.0228369	0.0229237	GlycA	PsA
6:33312308:A:G	rs3130014	6	33312308	2.52833e-12	33203908	33734793	110	40	7	rs9277990;rs3130014;rs4711325;rs201661374;rs12660617;rs55642707;rs764753	5	rs9277990;rs3130014;rs12660617;rs55642707;rs764753	2029	3.81555e-103	1.90865e-103	0.656379	0.328325	0.0152955	GlycA	RA
8:126474356:A:G	rs2980884	8	126474356	1.83773e-10	126474356	126491304	12	1	1	rs2980884	1	rs2980884	105	1.05686e-41	0.977985	7.98132e-44	0.007371	0.0146438	GlycA	AS
6:33335448:C:T	rs3130001	6	33335448	6.52301e-11	33204274	33734793	231	163	7	rs9277952;rs3130001;rs402519;rs407415;rs4713656;rs2967;rs4713669	4	rs9277952;rs3130001;rs402519;rs4713656	2437	6.3746e-122	3.6986e-122	0.623794	0.361916	0.0142903	GlycA	AS
16:71663532:G:T	rs62053104	16	71663532	1.88611e-08	71124608	71912261	31	29	2	rs62053104;rs144798722	1	rs62053104	1647	5.73297e-77	0.543918	4.66766e-77	0.442833	0.0132487	GlycA	PsA
8:126474306:A:G	rs2980885	8	126474306	1.19377e-08	126474306	126491304	13	2	2	rs2980885;rs2980884	1	rs2980885	91	1.06836e-41	0.984555	4.07822e-44	0.00374661	0.0116984	GlycA	RA
8:11673985:C:G	rs78709955	8	11673985	3.27095e-08	11450422	11712639	78	53	3	rs78709955;rs13265201;rs34962960	1	rs78709955	1142	5.0996e-05	0.0336485	0.00144523	0.953588	0.0112674	GlycA	PsA
11:116863042:A:C	rs606343	11	116863042	3.77542e-11	116701535	117100594	289	232	5	rs606343;rs504068;rs1242229;rs236915;rs613808	1	rs606343	1450	1.09874e-20	0.663862	5.3801e-21	0.325057	0.0110811	GlycA	RA
5:158678224:A:T	rs4921200	5	158678224	2.2419e-09	158529343	158744660	56	27	1	rs4921200	1	rs4921200	512	5.25447e-37	5.07088e-39	0.979632	0.00944313	0.0109244	GlycA	PsA
6:24945447:A:T	rs9356949	6	24945447	2.21591e-08	24924875	24950599	33	28	1	rs9356949	1	rs9356949	129	7.75616e-17	1.63392e-19	0.987391	0.0020695	0.010539	GlycA	AS
16:71892498:A:C	rs76535198	16	71892498	2.53119e-12	71452464	72899961	189	123	13	rs148796064;rs74026831;rs117866491;rs76535198;rs8055655;rs11647844;rs12919469;rs77147683;rs140535806;rs78529492;rs7198936;rs11864453;rs12597458	7	rs148796064;rs74026831;rs117866491;rs76535198;rs78529492;rs7198936;rs12597458	4305	1.54649e-209	0.468251	1.72175e-209	0.521306	0.0104424	GlycA	AS
1:113871830:C:T	rs72685699	1	113871830	1.35687e-08	113826039	113919261	15	8	2	rs72685699;rs773556	1	rs72685699	306	1.57358e-30	2.65204e-32	0.975458	0.0164318	0.0081104	GlycA	RA
11:116707338:A:G	rs7116797	11	116707338	1.79126e-09	116528544	117071970	29	20	2	rs11216103;rs7116797	2	rs11216103;rs7116797	1894	2.58731e-61	0.368511	4.37955e-61	0.623772	0.00771694	GlycA	PsA
6:27217236:C:T	rs10946904	6	27217236	3.74774e-15	25685889	29614627	2114	1560	37	rs17270561;rs9348697;rs9393676;rs12216125;rs78833965;rs11753610;rs35212793;rs1796518;rs1977200;rs10946904;rs7756881;rs858975;rs60266855;rs72839454;rs72843729;rs35416932;rs13194984;rs7772827;rs7766356;rs1233585;rs3116835;rs4713207;rs72846794;rs71559077;rs9257858;rs17177618;rs9468532;rs3129128;rs3025671;rs362538;rs3095275;rs4711185;rs2745412;rs3095268;rs9257805;rs1235162;rs7774576	15	rs17270561;rs11753610;rs35212793;rs10946904;rs72839454;rs35416932;rs7772827;rs71559077;rs9257858;rs17177618;rs3025671;rs362538;rs2745412;rs3095268;rs7774576	16076	0	0	0.00879346	0.99085	0.000356178	GlycA	AS
6:29611885:C:T	rs3131854	6	29611885	3.81599e-14	27519947	29614649	231	198	15	rs71559077;rs1029328;rs17177618;rs16894932;rs114183654;rs6931228;rs1233388;rs6933976;rs9257858;rs3095268;rs6903989;rs9257794;rs3131854;rs362538;rs146950657	6	rs71559077;rs17177618;rs1233388;rs3095268;rs3131854;rs146950657	5726	9.77512e-15	1.78243e-13	0.0519789	0.947803	0.000218548	GlycA	PsA
19:19386339:A:G	rs11882123	19	19386339	6.77066e-09	19373689	19657632	171	148	1	rs11882123	1	rs11882123	521	4.1803e-09	0.00356211	1.16928e-06	0.996363	7.3535e-05	GlycA	RA
8:11338383:A:G	rs62489069	8	11338383	9.68388e-13	10837414	11460909	250	227	7	rs62489069;rs7844858;rs2409784;rs4841469;rs6998387;rs34932002;rs12680762	1	rs62489069	2479	1.20202e-12	4.07711e-06	2.94813e-07	0.999974	2.11778e-05	GlycA	RA

[truncated: 4 more sheets: Table S9, Table S10, Table S11, Immunecell_mapping]
